# Supplementary material for: Identification of Differentially Expressed Genes in Pituitary Adenomas by Integrating Analysis of Microarray Data
Source: Int J Endocrinol. 2015 Jan 6;2015:164087. doi: 10.1155/2015/164087 (PMC4302352; doi:10.1155/2015/164087)
Supplement: Supplementary file 1 — The gene symbol, P-value, the average expression value in pituitary adenoma and normal control tissues, and fold change of all DEGs were available in the Supplementary Table 1. [file 164087.f1.xlsx]

## Sheet: Up-regulated genes
#GENE_symbol	GENE_NM	P-value	Pituitary_average_value	control_average_value	Fold change
C7orf62	NM_152706	3.33067e-16	-0.426375	-1.55193	2.1819
STARD9	NM_020759	1.27676e-14	-0.0525187	-0.946991	1.8589
GAL3ST3	NM_033036	1.29008e-13	0.201063	-0.794265	1.9935
KIAA1524	NM_020890	1.0868e-12	-0.237109	-0.671131	1.351
LOC100289187	NM_001195541	2.48557e-12	0.172665	-0.891838	2.0914
CYGB	NM_134268	4.84546e-12	0.0783216	-0.831471	1.8788
C9orf66	NM_152569	1.72879e-11	-0.394169	-0.974403	1.4951
SLC35F4	NM_001080455	1.9131e-11	-0.0801893	-1.26548	2.2741
LPAR5	NM_001142961	3.2598e-11	-0.484875	-0.948725	1.3792
C1orf101	NM_001130957	3.6298e-11	-0.27972	-0.576841	1.2287
LRFN5	NM_152447	3.8024e-11	0.166899	-0.784127	1.9332
WBP2NL	NM_152613	4.7255e-11	-0.494294	-1.10389	1.5258
TCF19	NM_001077511	6.2784e-11	-0.608233	-1.27815	1.591
PCDHGC5	NM_032407	1.0052e-10	-0.417228	-0.800765	1.3045
AQP1	NM_001185060	1.0105e-10	-0.34455	-1.07575	1.66
IGSF5	NM_001080444	1.1775e-10	0.0834693	-0.748606	1.7802
NCKAP5	NM_207363	1.2177e-10	-0.366875	-0.869473	1.4168
MAD2L1	NM_002358	1.4575e-10	0.193554	-0.377004	1.4851
ASB12	NM_130388	2.1079e-10	-0.523203	-1.3192	1.7363
LOC283050	NR_015429	2.3437e-10	-0.446271	-0.925167	1.3937
ANKDD1A	NM_182703	3.7038e-10	-0.380742	-0.679224	1.2298
GNGT2	NM_031498	5.1408e-10	-0.448421	-0.915195	1.382
FAM175A	NM_139076	6.3109e-10	-0.338422	-0.813817	1.3903
OTX1	NM_014562	8.0257e-10	-0.560717	-1.67814	2.1696
ZNF681	NM_138286	8.1088e-10	-0.393931	-0.783749	1.3102
C20orf203	NM_182584	8.9491e-10	-0.4501	-1.00117	1.4652
SPINK6	NM_205841	9.4237e-10	-0.562971	-1.62595	2.0892
CACNA2D4	NM_172364	1.1577e-09	1.16529	-0.294044	2.7498
TAAR8	NM_053278	1.1781e-09	-0.444448	-1.02364	1.494
SLC39A5	NM_173596	1.3842e-09	-0.427273	-0.832053	1.3239
PSD2	NM_032289	1.4125e-09	-0.581028	-1.20482	1.5409
THRSP	NM_003251	1.612e-09	-0.718992	-1.26206	1.4571
INSM2	NM_032594	1.6166e-09	-0.518315	-1.25352	1.6646
SKA3		1.6385e-09	-0.355345	-1.05006	1.6186
HAPLN4	NM_023002	1.8328e-09	-0.598881	-1.33067	1.6607
FAM170A	NM_182761	2.325e-09	-0.561664	-1.30705	1.6764
IPCEF1	NM_001130699	2.361e-09	-0.183409	-0.917085	1.6629
ZNF853	NM_017560	2.4019e-09	0.00136933	-0.532794	1.4481
PSKH2	NM_033126	2.4161e-09	-0.665795	-1.68619	2.0285
C16orf54	NM_175900	2.5355e-09	-0.597147	-1.43087	1.7823
WNT7B	NM_058238	2.5609e-09	-0.566148	-1.59511	2.0406
ZNF596	NM_001042415	3.0558e-09	-0.135014	-0.378417	1.1838
REXO1	NM_020695	3.0613e-09	-0.599977	-1.05385	1.3697
SLITRK2	NM_032539	3.1496e-09	-0.578295	-1.47525	1.8621
SLC46A2	NM_033051	3.3463e-09	-0.643821	-1.67227	2.0398
GLYATL2	NM_145016	3.3606e-09	-0.692435	-1.16745	1.3899
PRCD	NM_001077620	3.6306e-09	0.100671	-0.836429	1.9147
NT5C1A	NM_032526	3.9048e-09	-0.626353	-1.63519	2.0123
FGF19	NM_005117	4.0926e-09	-0.605645	-1.61374	2.0113
ENPP3	NM_005021	4.9279e-09	-0.591877	-1.01127	1.3374
PRKAG3	NM_017431	5.1051e-09	-0.645961	-1.65401	2.0112
ZNF354C	NM_014594	5.4321e-09	-0.578843	-0.927652	1.2735
PHOSPHO1	NM_178500	6.2692e-09	-0.502837	-1.20012	1.6214
TRIM67	NM_001004342	6.7344e-09	-0.376324	-0.93247	1.4703
LIPA	NM_000235	6.8089e-09	-0.377079	-0.856182	1.3939
PPARGC1B	NM_001172698	7.0117e-09	0.587833	-0.464818	2.0743
RHOXF1	NM_139282	7.3734e-09	-0.617256	-1.29344	1.5979
KRTAP3-2	NM_031959	8.0996e-09	-0.586869	-1.35954	1.7084
ACY3	NM_080658	8.4293e-09	-0.477597	-1.0661	1.5037
COL6A5	NM_153264	8.5287e-09	-0.660903	-1.64218	1.9742
ZBTB22	NM_001145338	1.087e-08	-0.0417287	-0.380322	1.2645
HOXC12	NM_173860	1.1479e-08	-0.62328	-1.6297	2.0089
UPP2	NM_001135098	1.3157e-08	-0.600612	-1.11903	1.4324
NLRP9	NM_176820	1.3325e-08	-0.595037	-1.45084	1.8098
ADAM32	NM_145004	1.3414e-08	-0.654364	-1.05031	1.3158
TFAP2E	NM_178548	1.35e-08	-0.271567	-0.597372	1.2534
OTUD7A	NM_130901	1.4534e-08	-0.62163	-1.06912	1.3637
APLF	NM_173545	1.496e-08	-0.6724	-1.07396	1.3209
TSPYL6	NM_001003937	1.4994e-08	-0.649802	-1.65478	2.0069
IL36G	NM_019618	1.5977e-08	-0.648602	-1.63902	1.9868
ARHGAP24	NM_001025616	1.6011e-08	-0.0920256	-0.55469	1.3781
GSG1L	NM_001109763	1.6402e-08	-0.726863	-1.40777	1.6031
DNAJC5B	NM_033105	1.6433e-08	-0.655168	-1.09942	1.3606
SGCZ	NM_139167	1.6867e-08	-0.78783	-1.35254	1.4791
GALNT12	NM_024642	1.7379e-08	0.517138	-0.566577	2.1195
TET1	NM_030625	1.7588e-08	-0.119516	-0.673204	1.4678
SPZ1	NM_032567	1.7624e-08	-0.697787	-1.67997	1.9754
JPH1	NM_020647	1.7921e-08	-0.38787	-0.832187	1.3607
CYSLTR2	NM_020377	1.8671e-08	-0.341702	-1.13358	1.7313
WNT9B	NM_003396	1.903e-08	-0.478021	-0.931725	1.3696
OSBPL7	NM_145798	1.9332e-08	-0.302017	-0.82707	1.439
ULBP3	NM_024518	1.939e-08	-0.629518	-1.57842	1.9304
PCSK9	NM_174936	1.9847e-08	-0.667314	-1.66402	1.9954
IL20	NM_018724	1.9896e-08	-0.652742	-1.55667	1.8712
SERPINB11	NM_080475	2.0713e-08	-0.750038	-1.24945	1.4136
CELA1	NM_001971	2.0947e-08	-0.676568	-1.62194	1.9257
TMEM169	NM_001142310	2.1012e-08	-0.663094	-1.23243	1.4838
KRTAP17-1	NM_031964	2.1166e-08	-0.678872	-1.62364	1.9249
KRTAP4-1	NM_033060	2.1225e-08	-0.687269	-1.66527	1.9697
CCDC155	NM_144688	2.216e-08	-0.540125	-1.41946	1.8395
RXFP2	NM_130806	2.2235e-08	-0.623624	-1.58406	1.9459
GUCA1C	NM_005459	2.3449e-08	-0.326187	-1.08975	1.6977
CLDN2	NM_020384	2.3784e-08	-0.689181	-1.65998	1.9599
OR8G1	NM_001002905	2.395e-08	-0.666318	-1.63762	1.9606
RERG	NM_001190726	2.4279e-08	-0.11085	-0.891349	1.7177
DGAT2	NM_032564	2.4359e-08	-0.190669	-0.99807	1.7501
ERCC8	NM_000082	2.5127e-08	0.089978	-0.226766	1.2455
LCE1E	NM_178353	2.5332e-08	-0.6308	-1.67825	2.0669
KCNQ5	NM_001160130	2.5771e-08	-0.035225	-0.916461	1.842
CDK18	NM_002596	2.5846e-08	0.301867	-0.597558	1.8653
SLC4A9	NM_031467	2.6661e-08	-0.640439	-1.11544	1.3899
PTPLAD2	NM_001010915	2.6769e-08	0.609393	-0.187923	1.7379
NLRP6	NM_138329	2.8592e-08	-0.658942	-1.67944	2.0286
ZNF474	NM_207317	2.8955e-08	-0.603622	-1.04678	1.3596
SCN1A	NM_001165963	2.9295e-08	-0.101914	-0.997376	1.8602
C11orf87	NM_207645	3.0499e-08	-0.422425	-1.14718	1.6526
IFNK	NM_020124	3.0638e-08	-0.630718	-1.5404	1.8786
ASB11	NM_080873	3.0641e-08	-0.695203	-1.65139	1.9402
MYPN	NM_032578	3.0834e-08	-0.489391	-1.24927	1.6934
IDO2	NM_194294	3.1195e-08	-0.682759	-1.6389	1.9401
CLEC4D	NM_080387	3.1828e-08	-0.710713	-1.20057	1.4043
C2orf61	NM_173649	3.2086e-08	-0.358514	-1.05028	1.6153
ZNF519	NM_145287	3.2101e-08	-0.371445	-0.728773	1.2811
FAM9C	NM_174901	3.4055e-08	-0.703984	-1.67455	1.9596
VN1R2	NM_173856	3.4541e-08	-0.665855	-1.56342	1.8629
MRGPRX4	NM_054032	3.5386e-08	-0.685054	-1.14262	1.3732
KIF21B	NM_017596	3.5472e-08	0.283075	-0.610275	1.8575
LIPI	NM_198996	3.6408e-08	-0.703033	-1.10934	1.3253
DPCR1	NM_080870	3.6585e-08	-0.657759	-1.62388	1.9536
TEX19	NM_207459	3.8323e-08	-0.671654	-1.59583	1.8976
C12orf39	NM_030572	3.9229e-08	-0.12143	-1.03341	1.8816
RERGL	NM_024730	3.9368e-08	-0.152871	-0.785913	1.5508
P2RY13	NM_176894	4.0122e-08	-0.307073	-0.913728	1.5227
WFDC12	NM_080869	4.2364e-08	-0.529177	-1.58005	2.0718
FAM46D	NM_152630	4.2918e-08	-0.671819	-1.64301	1.9605
SPC24		4.3156e-08	-0.426549	-1.31222	1.8476
C11orf40	NM_144663	4.3766e-08	-0.598584	-1.65256	2.0763
IL31RA	NM_139017	4.4215e-08	-0.653779	-1.63449	1.9734
LCE1B	NM_178349	4.4372e-08	-0.684195	-1.61182	1.9021
MND1	NM_032117	4.4552e-08	-0.499254	-1.00309	1.418
LINGO1	NM_032808	4.4936e-08	-0.167241	-0.721386	1.4683
ZNF560	NM_152476	4.605e-08	-0.680028	-1.67211	1.989
SLC7A13	NM_138817	4.6073e-08	-0.692921	-1.6157	1.8958
GPR174	NM_032553	4.6308e-08	-0.670923	-1.56783	1.8621
NUP210L	NM_001159484	4.6465e-08	-0.816094	-1.35789	1.4558
SERPINA12	NM_173850	4.6575e-08	-0.717121	-1.16711	1.366
DEFB125	NM_153325	4.7086e-08	-0.658147	-1.54487	1.849
LOC100132167	XM_001715998	4.7107e-08	0.0775239	-0.42199	1.4137
PSMA8	NM_144662	4.7422e-08	-0.691745	-1.62093	1.9042
ITGA4	NM_000885	4.7889e-08	-0.110257	-0.70547	1.5107
ABCG8	NM_022437	4.9036e-08	-0.678551	-1.61271	1.9108
CCDC63	NM_152591	4.9225e-08	-0.654619	-1.57752	1.8959
DEFB127	NM_139074	4.9732e-08	-0.706679	-1.67335	1.9543
IFLTD1	NM_152590	5.0012e-08	-0.654378	-1.58263	1.903
SP7	NM_152860	5.1678e-08	-0.628262	-1.58787	1.9448
PBK	NM_018492	5.2252e-08	-0.387318	-1.06454	1.5991
LOC284373		5.342e-08	-0.36638	-0.655722	1.2221
KRTAP9-3	NM_031962	5.385e-08	-0.557789	-1.52399	1.9537
DCAF4L2	NM_152418	5.4552e-08	-0.655147	-1.61715	1.948
C17orf64	NM_181707	5.4706e-08	-0.648129	-1.4767	1.7759
MCHR2	NM_001040179	5.5952e-08	-0.663878	-1.64562	1.9749
CCDC116	NM_152612	5.7051e-08	-0.398711	-0.967037	1.4828
IL36A	NM_014440	5.771e-08	-0.466344	-0.983364	1.431
GRK7		5.8964e-08	-0.714882	-1.67309	1.9429
ASB17	NM_080868	5.9847e-08	-0.700925	-1.63177	1.9064
PRUNE	NM_021222	6.0705e-08	-0.157777	-0.52357	1.2886
SFTA2	NM_205854	6.0748e-08	-0.642369	-1.49886	1.8106
REG3G	NM_001008387	6.0751e-08	-0.705838	-1.67365	1.9559
KRTAP3-3	NM_033185	6.0768e-08	-0.668929	-1.57307	1.8714
HORMAD2	NM_152510	6.0777e-08	-0.545215	-1.18809	1.5614
ANKS4B	NM_145865	6.0821e-08	-0.683075	-1.60023	1.8884
CACNG7	NM_031896	6.0908e-08	-0.637877	-1.2473	1.5256
LY6K	NM_017527	6.1503e-08	-0.68046	-1.56244	1.8429
RGAG1	NM_020769	6.1565e-08	-0.220899	-0.644706	1.3415
ARL9	NM_206919	6.1904e-08	-0.699559	-1.31033	1.5271
WDR88	NM_173479	6.2118e-08	-0.688644	-1.59224	1.8707
ENTHD1	NM_152512	6.2319e-08	-0.71691	-1.67847	1.9474
KRT27	NM_181537	6.2626e-08	-0.69727	-1.61851	1.8937
ZNF804A	NM_194250	6.3135e-08	0.156233	-0.968666	2.1809
WFDC9	NM_147198	6.3847e-08	-0.653939	-1.02755	1.2956
PASD1	NM_173493	6.4116e-08	-0.476705	-1.59158	2.1658
KIAA1211	NM_020722	6.4408e-08	0.0709848	-0.598532	1.5905
NLRP13	NM_176810	6.4785e-08	-0.716013	-1.68272	1.9544
ASZ1	NM_130768	6.523e-08	-0.714554	-1.66533	1.9329
CCDC105	NM_173482	6.5408e-08	-0.651379	-1.49723	1.7973
HOXC9	NM_006897	6.6041e-08	-0.695402	-1.60623	1.8801
PDILT	NM_174924	6.6611e-08	-0.607083	-1.58717	1.9726
FRMD7	NM_194277	6.7683e-08	-0.718601	-1.68637	1.9558
TAAR1	NM_138327	6.8018e-08	-0.711765	-1.65633	1.9246
FSCB	NM_032135	6.8393e-08	-0.698332	-1.63505	1.9142
PLA2G12B	NM_032562	6.856e-08	-0.716001	-1.68208	1.9535
RNF133	NM_139175	6.8641e-08	-0.696867	-1.60505	1.8767
KRT74	NM_175053	6.9743e-08	-0.589887	-1.38349	1.7334
TEDDM1	NM_172000	7.0088e-08	-0.707973	-1.66668	1.9436
CARD18	NM_021571	7.0652e-08	-0.634104	-1.50148	1.8243
TAAR9	NM_175057	7.1473e-08	-0.710897	-1.68321	1.962
KRT82	NM_033033	7.163e-08	-0.642591	-1.54392	1.8678
GTSF1L	NM_001008901	7.2116e-08	-0.673847	-1.61459	1.9195
ZPLD1	NM_175056	7.2752e-08	-0.701864	-1.68328	1.9744
SERPINB12	NM_080474	7.3125e-08	-0.715674	-1.68084	1.9523
PDZD9	NM_173806	7.5784e-08	-0.705519	-1.6243	1.8905
LOC728730	XR_109973	7.8392e-08	-0.0407592	-0.615527	1.4894
BTD	NM_000060	7.8479e-08	0.0895801	-0.330434	1.3379
C1orf110	NM_178550	7.9818e-08	-0.366008	-1.2097	1.7946
C1orf65	NM_152610	8.0206e-08	-0.699777	-1.67288	1.9631
2014-09-01	NM_052838	8.0378e-08	-0.734702	-1.2691	1.4483
CASK	NM_001126054	8.1329e-08	-0.111608	-0.599399	1.4023
HS3ST5	NM_153612	8.5148e-08	-0.620622	-1.17803	1.4716
OR2C3	NM_198074	8.5756e-08	-0.697289	-1.60427	1.8751
HOXA13	NM_000522	8.5762e-08	-0.681645	-1.55177	1.8278
GALP	NM_033106	8.7908e-08	-0.589457	-1.66681	2.1102
CNGA1	NM_000087	8.8262e-08	0.0493839	-0.619448	1.5898
UGT3A1	NM_001171873	8.8563e-08	-0.791374	-1.26109	1.3848
PLAC1L	NM_173801	8.9884e-08	-0.700511	-1.59841	1.8633
APOA1BP	NM_144772	9.0243e-08	1.79165	1.49653	1.227
SPERT	NM_152719	9.0703e-08	-0.646113	-1.60371	1.9421
USH1G	NM_173477	9.0921e-08	-0.711374	-1.33719	1.5431
GPR111	NM_153839	9.2313e-08	-0.686242	-1.65226	1.9534
TMPRSS12	NM_182559	9.2333e-08	-0.670741	-1.58616	1.8861
TXNDC8	NM_001003936	9.2809e-08	-0.648786	-1.14332	1.4089
AGXT2	NM_031900	9.41e-08	-0.693004	-1.63112	1.916
C20orf166	NM_178463	9.427e-08	-0.654135	-1.47055	1.761
SIAH3	NM_198849	9.5414e-08	-0.660683	-1.5609	1.8663
FLJ45983	NR_024255	9.8307e-08	0.0249145	-0.9379	1.9491
FAM5C	NM_199051	1.0233e-07	0.267609	-0.885768	2.2243
ASAH2B	NM_001079516	1.053e-07	-0.294997	-0.748124	1.369
CLDN20	NM_001001346	1.0821e-07	-0.668666	-1.18618	1.4315
FAM122B	NM_001166599	1.1097e-07	-0.275198	-0.577798	1.2334
MRGPRX3	NM_054031	1.1102e-07	-0.544705	-1.56187	2.0239
POC5	NM_001099271	1.1496e-07	0.0850131	-0.278345	1.2864
CLCNKB	NM_000085	1.1578e-07	-0.370203	-1.17457	1.7464
LOC100506555	XR_108462	1.168e-07	-0.613471	-0.997579	1.3051
C14orf178	NM_001173978	1.2447e-07	-0.60195	-1.1967	1.5102
DCDC2	NM_001195610	1.2557e-07	-0.56507	-1.01183	1.363
RNF157	NM_052916	1.3043e-07	0.71481	0.0251469	1.6129
CD99L2	NM_001184808	1.311e-07	-0.56907	-1.26627	1.6214
C17orf103	NM_152914	1.3326e-07	-0.412898	-0.70209	1.222
TAS2R41	NM_176883	1.3416e-07	-0.686504	-1.62552	1.9172
CLEC3A	NM_005752	1.3444e-07	-0.70633	-1.63021	1.8972
CENPH	NM_022909	1.3524e-07	-0.271022	-0.758368	1.4019
NCRNA00086	NR_024359	1.3804e-07	1.86427	0.892045	1.9619
C2orf16	NM_032266	1.4941e-07	-0.815857	-1.35742	1.4555
C12orf50	NM_152589	1.5014e-07	-0.686091	-1.57518	1.852
SP6	NM_199262	1.5499e-07	-0.766295	-1.36063	1.5098
ANKRD50	NM_001167882	1.5857e-07	0.125211	-0.556429	1.604
LCTL	NM_207338	1.6367e-07	-0.53356	-0.903819	1.2926
TMC8	NM_152468	1.6647e-07	-0.395024	-1.11788	1.6504
TAS2R50	NM_176890	1.687e-07	-0.710791	-1.16676	1.3717
C17orf66	NM_152781	1.6994e-07	-0.376492	-1.3337	1.9415
KLHL32	NM_052904	1.7367e-07	-0.107662	-0.577489	1.3849
GSTA5	NM_153699	1.7808e-07	-0.651859	-1.59198	1.9187
FIBCD1	NM_032843	1.8164e-07	-0.369637	-0.8114	1.3583
SDR9C7	NM_148897	1.8276e-07	-0.672446	-1.61959	1.928
SLC35F1	NM_001029858	1.8609e-07	0.700146	-0.38471	2.1212
PRSS55	NM_001197020	1.8858e-07	-0.680512	-1.1862	1.4198
C3orf56	XR_108480	1.9036e-07	-0.584954	-0.967	1.3032
MOV10L1	NM_018995	2.0101e-07	-0.630581	-1.42871	1.7389
DNHD1	NM_144666	2.2001e-07	-0.628356	-0.98861	1.2837
ERVFRD-1	NM_207582	2.2738e-07	-0.670042	-1.53425	1.8203
EFCAB5	NM_001145053	2.2753e-07	-0.642182	-1.0837	1.358
LYPD6B	NM_177964	2.3024e-07	-0.367884	-1.11625	1.6799
APOBEC3F	NM_001006666	2.3563e-07	0.0911578	-0.565067	1.576
KRT79	NM_175834	2.3855e-07	-0.832707	-1.36127	1.4425
HSF2	NM_001135564	2.5159e-07	-0.0705881	-0.388597	1.2466
CXorf58	NM_001169574	2.5226e-07	-0.777668	-1.1983	1.3385
ZNF684	NM_152373	2.7865e-07	-0.357075	-0.639742	1.2164
DNAJB8	NM_153330	3.0207e-07	-0.817951	-1.32405	1.4202
PAQR7	NM_178422	3.0232e-07	-0.230761	-0.425593	1.1446
FAM83D	NM_030919	3.026e-07	-0.728809	-1.3254	1.5121
C9orf41	NM_152420	3.0636e-07	-0.482367	-0.878645	1.3161
ANKRD30A	NM_052997	3.1275e-07	-0.418602	-1.57387	2.2273
C10orf111	NM_153244	3.1467e-07	-0.434222	-0.91557	1.396
OR52D1	NM_001005163	3.1502e-07	-0.753654	-1.38327	1.5472
ZNF582	NM_144690	3.214e-07	-0.263159	-0.449453	1.1378
BEND6	NM_152731	3.2646e-07	-0.227264	-0.708009	1.3955
SLC25A2	NM_031947	3.352e-07	-0.776171	-1.24262	1.3817
BBS1	NM_005700	3.4145e-07	-0.347089	-0.738545	1.3117
SPRR4	NM_173080	3.4218e-07	-0.745674	-1.21874	1.3881
OLIG1	NM_138983	3.4341e-07	-0.651825	-1.16314	1.4253
FEV	NM_017521	3.4402e-07	0.092256	-0.584036	1.598
FAM83A	NM_032899	3.4735e-07	-0.833724	-1.31807	1.399
ZCCHC18	NM_001143978	3.5608e-07	0.622294	-0.162202	1.7225
CALHM1	NM_001001412	3.6018e-07	-0.641629	-1.02588	1.3052
UNC13C	NM_001080534	3.6489e-07	-0.1357	-0.997637	1.8175
RBM45	NM_152945	4.0055e-07	-0.182318	-0.559099	1.2984
SPHKAP	NM_001142644	4.1219e-07	-0.598277	-1.27295	1.5962
FOXR2	NM_198451	4.1575e-07	-0.425784	-1.09735	1.5928
DNAH12	NM_178504	4.3204e-07	-0.195861	-0.554839	1.2825
CDH8	NM_001796	4.3403e-07	0.0768523	-0.729245	1.7485
TTLL6	NM_173623	4.4135e-07	0.0448203	-1.01605	2.0862
C2orf48	NM_182626	4.5542e-07	-0.694851	-1.57653	1.8425
DLX3	NM_005220	4.5841e-07	-0.640604	-1.40212	1.6953
XAGE5	NM_130775	4.6505e-07	-0.585882	-1.25665	1.5919
GLIPR1L1	NM_152779	4.7433e-07	-0.812122	-1.29897	1.4014
NFAM1	NM_145912	4.996e-07	-0.711632	-1.24541	1.4477
NMUR2	NM_020167	5.2214e-07	-0.755156	-1.22587	1.3858
YIPF7	NM_182592	5.2439e-07	-0.562349	-1.20692	1.5633
CMTM2	NM_144673	5.5898e-07	-0.390062	-1.54593	2.2282
TMCO5A	NM_152453	5.5925e-07	-0.693726	-1.10593	1.3307
HIPK4	NM_144685	5.6326e-07	-0.783196	-1.20406	1.3387
DEFB118	NM_054112	5.7399e-07	0.439374	-1.59606	4.0994
ZBTB39	NM_014830	5.9694e-07	-0.275261	-0.566042	1.2233
PTGFRN	NM_020440	6.3195e-07	-0.483022	-0.923775	1.3573
TMEM207	NM_207316	6.6625e-07	-0.497732	-1.31145	1.7577
UROC1	NM_144639	6.716e-07	-0.663517	-1.62339	1.9451
PDE7B	NM_018945	7.021e-07	0.0856983	-0.337564	1.341
LRRC7	NM_020794	7.4739e-07	-0.495164	-1.17555	1.6026
NUF2	NM_031423	7.5601e-07	-0.635645	-1.03029	1.3146
OTUB2	NM_023112	8.1449e-07	-0.472413	-0.933759	1.3768
MYOM3	NM_152372	8.2295e-07	-0.843744	-1.34026	1.4108
KLHL30	NM_198582	8.2417e-07	-0.488245	-0.901238	1.3314
TAS2R20	NM_176889	8.4076e-07	-0.718012	-1.61541	1.8627
APOBEC4	NM_203454	9.2668e-07	-0.723029	-1.22362	1.4148
SLC8A1	NM_001112800	9.4523e-07	0.00549188	-0.618714	1.5414
TTLL9	NM_001008409	9.8825e-07	-0.226444	-0.69989	1.3884
PLEKHA7	NM_175058	1.0164e-06	-0.418036	-0.816429	1.318
STMN4	NM_030795	1.0351e-06	-0.27112	-1.078	1.7494
LYZL4	NM_144634	1.0393e-06	-0.929297	-1.47575	1.4605
TSGA13	NM_052933	1.0449e-06	-0.763434	-1.2537	1.4047
PRMT8	NM_019854	1.092e-06	-0.574195	-1.30634	1.6611
ZFPM2	NM_012082	1.1475e-06	0.384527	-0.405429	1.729
P2RY12	NM_022788	1.1595e-06	0.0173827	-0.712667	1.6587
TONSL	NM_013432	1.1796e-06	-0.128488	-0.893603	1.6995
ZCCHC13	NM_203303	1.2184e-06	-0.617683	-1.24077	1.5402
CCDC109A	NM_138357	1.2434e-06	0.654313	0.0899246	1.4788
FHL5	NM_001170807	1.2567e-06	-0.486284	-0.99635	1.4241
BEX1	NM_018476	1.2867e-06	5.22609	2.71553	5.6984
OLIG3	NM_175747	1.3374e-06	0.878901	-1.66059	5.8139
KCNH7	NM_033272	1.3414e-06	-0.654208	-1.18248	1.4422
C22orf42	NM_001010859	1.3531e-06	0.264608	-0.861249	2.1823
ODF3L1	NM_175881	1.3735e-06	-0.547391	-1.20868	1.5815
FAM66C	NR_026788	1.4103e-06	-0.500162	-0.900199	1.3195
ADC	NM_052998	1.4446e-06	0.0858441	-0.136678	1.1668
FAM71D	NM_173526	1.4817e-06	-0.741095	-1.17682	1.3526
MRAP2	NM_138409	1.5056e-06	1.29621	0.39022	1.8738
HSFX1	NM_016153	1.5212e-06	0.17669	-0.842387	2.0266
TTC16	NM_144965	1.5861e-06	-0.299186	-0.820833	1.4356
SGOL1	NM_001012409	1.6004e-06	-0.855206	-1.33051	1.3902
OSR1	NM_145260	1.6758e-06	-0.959878	-1.48421	1.4383
MCART6	NM_001012755	1.6866e-06	-0.5842	-1.16462	1.4953
KLHL10	NM_152467	1.6922e-06	-0.855279	-1.37412	1.4328
SLC25A48	NM_145282	1.704e-06	-0.844534	-1.28831	1.3602
ATL2	NM_001135673	1.7334e-06	-0.490909	-0.878753	1.3084
C20orf103	NM_012261	1.7357e-06	1.08135	-0.246413	2.5101
MAGEB10	NM_182506	1.7359e-06	-0.713816	-1.60266	1.8517
RSRC1	NM_016625	1.7575e-06	-0.210159	-0.731971	1.4358
GSDMA	NM_178171	1.7837e-06	-0.529741	-1.04549	1.4297
OR1D5	NM_014566	1.8292e-06	-0.456386	-1.08583	1.547
BUB1B	NM_001211	1.8398e-06	-0.159088	-0.470116	1.2406
CAPZA3	NM_033328	1.9028e-06	-0.815926	-1.31462	1.4129
DLL4	NM_019074	1.9961e-06	-0.855751	-1.31629	1.3761
LOC100506354	XR_110841	2.0684e-06	-0.583115	-1.01725	1.3511
ZNF543	NM_213598	2.0733e-06	-0.487076	-0.961601	1.3895
EPHA6	NM_001080448	2.1264e-06	-0.885223	-1.41094	1.4397
KRTAP9-2	NM_031961	2.1618e-06	-0.719639	-1.58141	1.8173
LOC100507187	XR_109041	2.186e-06	-0.606897	-1.23275	1.5431
CTTNBP2NL	NM_018704	2.2248e-06	-0.443923	-0.712777	1.2049
SPATA16	NM_031955	2.2498e-06	-0.778665	-1.27698	1.4126
REG4	NM_001159352	2.28e-06	-0.696566	-1.32402	1.5448
KIRREL2	NM_032123	2.3003e-06	-0.646593	-1.02899	1.3035
LOC100129175	XM_001714355	2.3311e-06	0.0820661	-0.485112	1.4816
TMEFF2	NM_016192	2.3437e-06	-0.756211	-1.21187	1.3714
CLEC4F	NM_173535	2.3907e-06	-0.643278	-1.18488	1.4556
ST6GALNAC1	NM_018414	2.401e-06	-0.405557	-1.10026	1.6186
ATP5B	NM_001686	2.5001e-06	3.28671	1.40793	3.6776
LASS6	NM_203463	2.5892e-06	0.0243822	-0.564955	1.5046
TMED6	NM_144676	2.5932e-06	-0.431775	-1.17546	1.6744
ZAK	NM_016653	2.683e-06	-0.385081	-0.780607	1.3154
GJC3	NM_181538	2.7034e-06	-0.484694	-0.847594	1.286
NRIP2	NM_031474	2.7785e-06	-0.0786315	-0.971195	1.8565
ACTRT1	NM_138289	2.9911e-06	-0.71748	-1.59878	1.842
DIEXF	NM_014388	2.9912e-06	-0.554598	-1.54006	1.9799
TRIM74	NM_198853	3.0724e-06	0.419663	0.0435572	1.2978
LOC158402		3.0872e-06	-0.0592217	-0.512612	1.3693
BTNL9	NM_152547	3.2441e-06	-0.658098	-1.07576	1.3358
MPL	NM_005373	3.2664e-06	-0.29276	-0.677594	1.3057
TMEM31	NM_182541	3.4145e-06	-0.425633	-0.918595	1.4073
CACNG2	NM_006078	3.426e-06	-0.469849	-0.998735	1.4428
KLHL14	NM_020805	3.5008e-06	-0.70046	-1.13061	1.3474
WDR33	NM_001006622	3.5322e-06	-0.410547	-1.04235	1.5495
STBD1	NM_003943	3.543e-06	-0.546172	-0.957573	1.33
FAM181B	NM_175885	3.5673e-06	0.568238	-0.352728	1.8934
GSG2	NM_031965	3.6228e-06	-0.83406	-1.31388	1.3946
LOC100507635	XR_110580	3.6323e-06	0.170862	-0.36157	1.4464
GRIA4	NM_000829	3.6468e-06	0.138752	-0.643942	1.7203
SMYD1	NM_198274	3.6747e-06	-0.677713	-1.34226	1.5851
FRMPD1	NM_014907	3.7249e-06	-0.160229	-0.588963	1.3461
OR2V2	NM_206880	3.7426e-06	-0.682669	-1.50781	1.7717
TMEM74	NM_153015	3.7543e-06	-0.847067	-1.31835	1.3863
PVRL3	NM_015480	3.777e-06	0.335062	-0.310405	1.5642
OR7G3	NM_001001958	3.927e-06	-0.714373	-1.51097	1.737
CLDN19	NM_001123395	3.9374e-06	-0.924314	-1.41016	1.4004
LOC401134	NR_033976	3.9989e-06	-0.602788	-0.925695	1.2508
TPI1P2	NR_002187	4.0393e-06	1.82905	1.35017	1.3937
C7orf25	NM_024054	4.0767e-06	0.63688	0.0990353	1.4518
FLJ44342	XR_109412	4.3386e-06	-0.327553	-0.775299	1.3639
KCNK18	NM_181840	4.3866e-06	-0.735417	-1.54969	1.7584
HMGA2	NM_003483	4.3866e-06	-0.262509	-0.84073	1.493
OR1L3	NM_001005234	4.4023e-06	-0.732922	-1.55688	1.7703
PKN3	NM_013355	4.4969e-06	-0.601321	-1.2696	1.5892
KBTBD4	NM_016506	4.5529e-06	-0.00473095	-0.367691	1.2861
FITM1	NM_203402	4.5566e-06	-0.723458	-1.12697	1.3227
SLC30A8	NM_001172811	4.6738e-06	-0.79486	-1.18742	1.3127
MIF4GD	NM_020679	4.6744e-06	-0.242589	-0.729778	1.4017
PCDHGA5	NM_032054	4.8266e-06	-0.68748	-1.60518	1.8891
ATOH7	NM_145178	4.8579e-06	-0.750677	-1.18824	1.3543
TRPC7	NM_001167576	4.9758e-06	-0.487512	-1.09719	1.5259
C14orf177	NM_182560	1.50585e-05	-0.725647	-1.68149	1.9397
LOC100506719	XR_110359	1.50793e-05	-0.171988	-0.516442	1.2697
ZNF530		1.50853e-05	-0.460778	-0.725981	1.2018
TAAR6	NM_175067	1.52784e-05	-0.681567	-1.60859	1.9013
ARHGAP30	NM_001025598	1.53039e-05	-0.655086	-1.00991	1.2788
NRIP3	NM_020645	1.53975e-05	-0.0997003	-0.650055	1.4644
BIRC8	NM_033341	1.54293e-05	-0.768764	-1.61842	1.8021
FAM194B	NM_182542	1.55017e-05	-0.766732	-1.61302	1.7979
HIGD1B	NM_016438	1.55368e-05	-0.209368	-0.967571	1.6914
IP6K3	NM_001142883	1.56462e-05	-0.741727	-1.14203	1.3198
CLCNKA	NM_000085	1.56664e-05	0.282728	-0.564407	1.7989
ATP2B2	NM_001001331	1.57038e-05	-0.205293	-0.578852	1.2955
CSMD1	NM_033225	1.57188e-05	-0.565263	-1.09257	1.4412
SPACA7	NM_145248	1.57615e-05	-0.607103	-1.6108	2.0051
LOC100509550	XR_112369	1.59855e-05	-0.621301	-1.00277	1.3027
FAM18A	NM_001079512	1.63953e-05	-0.208926	-0.549893	1.2666
FAM64A	NM_019013	1.65272e-05	-0.136628	-0.559202	1.3403
NCRNA00277	NR_026949	1.65663e-05	-0.78723	-1.39087	1.5195
FGFBP2	NM_031950	1.66873e-05	-0.340956	-0.867288	1.4403
SHCBP1	NM_024745	1.67209e-05	-0.560729	-1.03578	1.39
FAM72D	NM_207418	1.67969e-05	-0.490141	-0.856638	1.2892
FILIP1L	NM_001042459	1.69205e-05	0.355969	-0.220875	1.4916
BPIFB6	NM_174897	1.69385e-05	-0.735708	-1.55137	1.7601
SPATA19	NM_174927	1.72429e-05	-0.661861	-1.33977	1.5998
KRT28	NM_181535	1.72806e-05	-0.597595	-1.1537	1.4703
FAM154B	NM_001008226	1.74947e-05	-0.388158	-0.704036	1.2448
SLC22A16	NM_033125	1.76722e-05	-0.814135	-1.26161	1.3637
ZFYVE20	NM_022340	1.77108e-05	-0.56584	-0.976968	1.3297
KANSL2	NM_017822	1.77557e-05	-0.00696331	-0.292129	1.2186
NCS1	NM_001128826	1.79526e-05	-0.541363	-1.02242	1.3958
NLRP10	NM_176821	1.79696e-05	-0.861888	-1.32036	1.3741
ZSCAN4	NM_152677	1.81348e-05	-0.81824	-1.24734	1.3464
KCNK3	NM_002246	1.81728e-05	0.0236635	-0.347676	1.2936
CCDC157	NM_001017437	1.82496e-05	-0.663454	-0.955119	1.2241
MBD3L1	NM_145208	1.83906e-05	-0.790302	-1.24963	1.3749
C16orf78	NM_144602	1.84705e-05	-0.448701	-0.773481	1.2525
RIMKLB	NM_020734	1.86517e-05	-0.394264	-0.872543	1.3931
NECAB1	NM_022351	1.88895e-05	0.506285	-0.611755	2.1705
SLC23A3	NM_001144889	1.89508e-05	-0.741502	-1.20074	1.3748
LOC284952	XM_001126137	1.89796e-05	-0.495465	-0.954469	1.3746
C5orf25	NM_198567	1.91887e-05	1.37196	0.957217	1.3331
SH2D4B	NM_001145719	1.92012e-05	-0.837438	-1.27537	1.3547
ARNTL2	NM_020183	1.92133e-05	-0.517719	-1.06248	1.4588
DZIP1L	NM_001170538	1.92384e-05	-0.720629	-1.12729	1.3256
ELK1	NM_001114123	1.92429e-05	-0.149739	-0.62342	1.3886
SLC27A4	NM_005094	1.95579e-05	-0.167352	-0.444863	1.2121
NKAPL	NM_001007531	1.9794e-05	-0.544813	-0.916679	1.294
GOT1L1	NM_152413	1.98441e-05	-0.855911	-1.31605	1.3757
LOC100133116		1.98558e-05	-0.341253	-0.723406	1.3033
NR1H2	NM_007121	1.99218e-05	0.22582	-2.76308e-05	1.1695
KIAA1456	NM_020844	1.99294e-05	-0.185739	-0.813013	1.5446
FAM3D	NM_138805	1.99428e-05	-0.370286	-0.897026	1.4407
KCP	NM_001135914	1.99632e-05	-0.844065	-1.30093	1.3726
SASS6	NM_194292	2.0144e-05	0.272878	-0.305584	1.4933
HMGN2P46	NR_022014	2.0363e-05	2.79437	2.54441	1.1892
ZNF747	NM_023931	2.0409e-05	-0.0709803	-0.303378	1.1748
VANGL2	NM_020335	2.0518e-05	0.340253	-0.21781	1.4723
MPP4	NM_033066	2.1506e-05	-0.735009	-1.11527	1.3016
EXOSC5	NM_020158	2.1518e-05	-0.051088	-0.416669	1.2884
FOXN4	NM_213596	2.1788e-05	-0.593701	-1.10985	1.4301
BCAS4	NM_001010974	2.2005e-05	0.0304188	-0.203261	1.1758
MCOLN2	NM_153259	2.2151e-05	-0.517788	-0.945266	1.3449
LOC285178		2.2326e-05	-0.0454976	-0.502303	1.3725
FNDC3A	NM_001079673	2.236e-05	0.224616	-0.564142	1.7276
PCDHAC1	NM_018898	2.2494e-05	-0.671632	-1.08413	1.331
LRRC28	NM_144598	2.2599e-05	-0.197433	-0.650579	1.369
SPOCK3	NM_001040159	2.2749e-05	0.0221426	-0.735591	1.6908
LOC100289610	XM_002343178	2.2842e-05	-0.202482	-0.603864	1.3208
RRP7A	NM_015703	2.2849e-05	-0.25011	-0.583294	1.2598
LATS1	NM_004690	2.2849e-05	-0.456973	-0.754237	1.2288
C9orf130	NR_023389	2.3198e-05	-0.247697	-0.575498	1.2551
KIF4A	NM_012310	2.3561e-05	-0.00271265	-0.696665	1.6177
SUCNR1	NM_033050	2.36e-05	-0.88466	-1.36972	1.3996
KCTD14	NM_023930	2.3706e-05	-0.0151188	-0.445686	1.3478
LOC100507248	XR_110066	2.3917e-05	0.404741	-0.46745	1.8304
TCN2	NM_000355	2.3968e-05	0.0564088	-0.352963	1.3281
C9orf84	NM_001080551	2.4137e-05	-0.824655	-1.21512	1.3108
NYNRIN	NM_025081	2.4364e-05	0.0337292	-0.473485	1.4213
TMEM199	NM_152464	2.457e-05	0.429011	0.174446	1.193
AGBL4	NM_032785	2.4583e-05	-0.71549	-1.19955	1.3987
SSBP2	NM_012446	2.4626e-05	0.375318	-0.117464	1.4072
GDEP	NR_026555	3.5587e-05	-0.299158	-1.24601	1.9277
CUL3	NM_003590	3.5678e-05	-0.149771	-0.454419	1.2351
BCMO1	NM_017429	3.568e-05	-0.489914	-0.910621	1.3386
GSK3B	NM_001146156	3.5792e-05	-0.096469	-0.4795	1.3041
ELFN2	NM_052906	3.6106e-05	-0.830596	-1.21411	1.3045
PHF12	NM_001033561	3.6162e-05	-0.510384	-1.40869	1.8639
DAG1	NM_001165928	3.6906e-05	0.0742173	-0.3529	1.3445
CNTN6	NM_014461	3.7315e-05	-0.195284	-0.78781	1.5079
ADRA2A	NM_000681	3.7531e-05	0.222587	-0.539635	1.6961
LANCL3	NM_001170331	3.7879e-05	-0.300268	-0.801169	1.4151
SLCO6A1	NM_173488	3.8037e-05	-0.838213	-1.26553	1.3447
PGBD1	NM_001184743	3.8213e-05	-0.414016	-0.752699	1.2646
RHOT1	NM_001033566	3.8978e-05	-0.0216695	-0.478131	1.3722
ACER1	NM_133492	3.9091e-05	-0.350916	-0.620337	1.2053
ZSCAN23	NM_001012455	3.9324e-05	-0.764868	-1.10321	1.2643
MYO18B	NM_032608	3.9716e-05	-0.763368	-1.24034	1.3918
CSPG5	NM_006574	3.9743e-05	-0.0095482	-0.397899	1.3089
CENPW	NM_001012507	3.9812e-05	-0.0410888	-0.479413	1.355
C5orf64	NM_173667	3.9897e-05	-0.610789	-1.14318	1.4463
CST2	NM_001322	4.0207e-05	0.604781	-1.05137	3.1518
LOC100286999		4.0434e-05	-0.431899	-0.578477	1.1069
OIT3	NM_152635	4.0493e-05	-0.864495	-1.33708	1.3876
GPR55	NM_005683	4.0632e-05	-0.771813	-1.25777	1.4005
HIST2H2BC	NR_036461	4.1283e-05	0.84307	0.594535	1.188
DUS2L	NM_017803	4.183e-05	-0.248545	-0.472485	1.1679
SLC17A8	NM_001145288	4.1948e-05	-0.248772	-0.783627	1.4488
CHST4	NM_001166395	4.2045e-05	0.094576	-0.424132	1.4327
COBLL1	NM_014900	4.2291e-05	-0.232604	-0.681704	1.3652
EPHB1	NM_004441	4.246e-05	0.284686	-0.245151	1.4438
LRRC71	NM_144702	4.2574e-05	-0.460281	-1.18918	1.6574
LOC338651	NR_021489	4.287e-05	-0.911107	-1.22262	1.241
C10orf91	NM_173541	4.3365e-05	-0.370041	-0.698002	1.2552
C7orf64	NM_032120	4.3463e-05	0.0134612	-0.295277	1.2386
OR51B2	NM_033180	4.3519e-05	-0.849301	-1.31078	1.3769
NDUFC2	NM_004549	4.3877e-05	1.36701	0.173922	2.2864
PDE6H	NM_006205	4.41e-05	-0.262141	-1.04543	1.7211
DPF3	NM_012074	4.4271e-05	0.0358577	-0.56475	1.5164
NCRNA00094	NR_015427	4.4319e-05	0.0567244	-0.362582	1.3373
FCF1	NM_015962	4.4609e-05	-0.474265	-0.869823	1.3155
LOC652993	XR_018000	5.548e-05	-0.562603	-0.806877	1.1845
KNTC1	NM_014708	5.5703e-05	-0.072738	-0.365928	1.2253
LOC285181		5.5773e-05	-0.751754	-1.09407	1.2678
CABP1	NM_001033677	5.5858e-05	-0.201196	-0.842685	1.5599
FATE1	NM_033085	5.5959e-05	-0.912266	-1.3528	1.3571
CCDC36	NM_001135197	5.5974e-05	-0.808561	-1.26313	1.3704
CYP11A1	NM_000781	5.6286e-05	-0.0556108	-0.644197	1.5038
MBD5	NM_018328	5.641e-05	-0.0452991	-0.328907	1.2172
SCAND3	NM_052923	5.6847e-05	-0.158769	-0.566276	1.3264
ZSCAN2	NM_001007072	5.7506e-05	-0.155678	-0.35355	1.147
GCNT3	NM_004751	5.8091e-05	-0.628472	-1.13656	1.4222
CYP8B1	NM_004391	5.8141e-05	-0.886748	-1.31744	1.3479
TMEM106A	NM_145041	5.8807e-05	-0.492401	-0.712928	1.1652
SSR4	NM_006280	5.9491e-05	4.61151	2.09998	5.7022
INPP5J	NM_001002837	5.9735e-05	-0.0375805	-0.572054	1.4484
RFTN2	NM_144629	6.0189e-05	-0.607598	-0.861361	1.1923
LOC643008	NM_001162995	6.0962e-05	-0.471539	-0.894072	1.3403
C9orf4	NM_014334	6.1083e-05	0.959457	0.602317	1.2809
RXFP1	NM_021634	6.1676e-05	-0.762042	-1.10097	1.2648
ZKSCAN4	NM_019110	6.1708e-05	-0.113252	-0.342214	1.172
RAD18	NM_020165	6.2062e-05	-0.41992	-0.925355	1.4196
ZP4	NM_021186	6.2111e-05	-0.890486	-1.34102	1.3665
LOC100505975	XR_109869	6.226e-05	-0.235143	-0.555668	1.2488
VTI1A	NM_145206	6.2623e-05	-0.1004	-0.342776	1.1829
DPYSL5	NM_020134	6.2632e-05	-0.329783	-0.770284	1.3571
KCNIP1	NM_001034837	6.3043e-05	-0.712322	-1.30831	1.5115
ZSWIM2	NM_182521	6.3076e-05	-0.563292	-0.954836	1.3118
LOC100652987	XR_132752	6.3538e-05	2.04063	1.47636	1.4786
LOC339929	NR_036497	6.4127e-05	-0.670477	-0.987489	1.2457
GRIK4	NM_014619	6.4383e-05	-0.666223	-1.32875	1.5829
CENPK	NM_022145	6.4885e-05	-0.585166	-1.14236	1.4714
LIPH	NM_139248	6.4922e-05	-0.726472	-1.12839	1.3213
PLCZ1	NM_033123	7.5404e-05	1.60595	-1.66137	9.6286
SPCS1	NM_014041	7.5411e-05	3.24051	1.95202	2.4427
NEK8	NM_178170	7.6563e-05	-0.317532	-0.801607	1.3987
ORMDL3	NM_139280	7.7121e-05	0.29944	-0.0855091	1.3058
RHBDL2	NM_017821	7.7362e-05	-0.464431	-1.09959	1.5531
CLCN5	NM_000084	7.7486e-05	-0.420375	-0.882293	1.3774
RPL11	NM_000975	7.7758e-05	5.99972	2.02421	15.731
LOC286272		7.8101e-05	-0.0505381	-0.440279	1.3102
LOC644538	NM_001163438	7.817e-05	-0.694628	-1.11561	1.3388
TPH2	NM_173353	7.8241e-05	-0.729794	-1.2249	1.4094
ITPK1-AS	NR_002808	7.8389e-05	-0.544828	-0.788265	1.1838
MC4R	NM_005912	7.8455e-05	-0.514214	-1.2215	1.6327
CD300LG	NM_001168322	7.8503e-05	-0.860382	-1.27854	1.3362
C4orf49	NM_032623	7.8641e-05	1.82542	1.14727	1.6001
LOC100128180		7.8712e-05	0.0450024	-0.146869	1.1422
TAS2R5	NM_018980	7.8948e-05	-0.602937	-0.977302	1.2963
MAEL	NM_032858	7.9186e-05	-0.657384	-1.14399	1.4011
C11orf82		7.9382e-05	2.27443	-1.52757	13.948
NCAN	NM_004386	7.977e-05	-0.22896	-0.606484	1.2991
MAGEE2	NM_138703	7.9825e-05	-0.365072	-0.707095	1.2675
FAM73B	NM_032809	8.0049e-05	-0.392352	-0.681507	1.2219
LOC401097	NM_001168214	8.0164e-05	-0.625642	-0.87041	1.1849
LOC100507194	XR_108693	8.0308e-05	-0.0430081	-0.793486	1.6823
GPR22	NM_005295	8.0386e-05	-0.587792	-1.05643	1.3838
C17orf86	NR_027058	8.1073e-05	-0.370221	-0.659917	1.2224
BUB1	NM_004336	8.1441e-05	-0.586549	-1.0648	1.3931
SUGT1P3	NR_003365	8.1507e-05	0.113013	-0.274895	1.3085
ZNF624	NM_020787	8.1602e-05	-0.316235	-0.665584	1.274
MANEAL	NM_001031740	8.214e-05	1.1167	0.729628	1.3077
FAM43B	NM_207334	8.222e-05	-0.219405	-0.960965	1.672
KIAA2026	NM_001017969	8.2282e-05	0.394548	0.138216	1.1944
MCM2	NM_004526	8.2463e-05	0.151271	-0.239425	1.311
GINS2	NM_016095	8.3609e-05	-0.0639991	-0.485399	1.3392
LOC441454	NR_028350	8.3635e-05	-0.714812	-1.02191	1.2372
DCX	NM_000555	8.494e-05	0.438944	-0.257209	1.6202
TEAD2	NM_003598	9.5908e-05	-0.794264	-1.19465	1.3199
LOC100130054		9.6009e-05	-0.638843	-0.890866	1.1909
STAP1	NM_012108	9.6496e-05	-0.583901	-1.18736	1.5194
PIGB	NM_004855	9.7103e-05	0.328859	-0.0327259	1.2848
FBXL13	NM_001111038	9.7447e-05	-0.394356	-0.879882	1.4001
PPP2R5E	NM_006246	9.7877e-05	0.0382844	-0.2112	1.1888
ADAMTSL1	NM_001040272	9.812e-05	0.110012	-0.736476	1.7981
PCSK1N	NM_013271	9.8162e-05	4.49319	2.27651	4.6482
USP38	NM_032557	9.8251e-05	-0.436979	-0.679265	1.1829
COX7B2	NM_130902	9.8893e-05	-0.810824	-1.20203	1.3115
2014-09-04	NM_001198713	9.905e-05	-0.190519	-0.518668	1.2554
TIMD4	NM_138379	9.9102e-05	-0.374606	-1.49506	2.1742
CCDC21	NM_022778	9.9416e-05	0.14171	-0.150792	1.2248
MDGA2	NM_001113498	0.000100116	-0.55188	-0.935381	1.3045
BTLA	NM_001085357	0.0001005	-0.833382	-1.28951	1.3719
ZNF385B	NM_001113397	0.000100611	-0.170888	-0.783287	1.5288
SLITRK4	NM_001184749	0.000100958	-0.750552	-1.06713	1.2454
LOC100130911		0.000101243	-0.464323	-0.93525	1.386
TAPT1	NM_153365	0.000101292	-0.347565	-0.788322	1.3573
IMPDH2	NM_000884	0.00010134	1.25831	0.00443071	2.3848
FAM45A	NM_207009	0.000101698	0.22917	-0.155483	1.3055
CNIH3	NM_152495	0.000104773	-0.196608	-0.497425	1.2318
TBL1XR1	NM_024665	0.000104855	0.108986	-0.298894	1.3267
KRT78	NM_173352	0.000104931	-0.571018	-1.17771	1.5228
KLHL6	NM_130446	0.000115129	-0.531156	-0.842174	1.2406
HIST2H2AA4	NM_001040874	0.000115336	1.16061	0.538525	1.5391
AQP11	NM_173039	0.000116158	-0.110489	-0.558505	1.3642
SNCB	NM_001001502	0.000116282	0.496877	-0.201871	1.6231
CABS1	NM_033122	0.000117567	0.25928	-1.49331	3.3696
LOC100287017		0.00011779	-0.300103	-0.595267	1.227
LPCAT2	NM_017839	0.000117967	-0.676443	-0.999043	1.2506
C2orf80	NM_001099334	0.00011907	0.659841	-0.596014	2.3881
NOL12	NM_001039141	0.000119154	1.0225	0.378991	1.5621
EFCAB4B	NM_001144958	0.000119526	-0.732942	-1.09079	1.2815
CDH9	NM_016279	0.00011976	-0.525094	-0.946633	1.3394
KBTBD10	NM_006063	0.000119826	0.575249	-0.203089	1.7152
RNF121	NM_018320	0.000119863	0.0054238	-0.208863	1.1601
GEN1	NM_001130009	0.000120146	0.133941	-0.113714	1.1873
PTPN5	NM_001039970	0.000120805	-0.619695	-1.06184	1.3586
RAD9B	NM_152442	0.000121184	-0.773473	-1.16596	1.3127
C22orf41	NM_001123225	0.000121367	-0.706421	-1.04649	1.2658
FEM1A	NM_018708	0.000121599	-0.14415	-0.401568	1.1953
COG6	NM_001145079	0.000122262	-0.676988	-1.17908	1.4163
CPA4	NM_001163446	0.000122858	-0.427168	-1.13653	1.6351
C1orf111	NM_182581	0.000122938	-0.787449	-1.52784	1.6706
MLF1IP	NM_024629	0.000123298	-0.461663	-0.991374	1.4436
COL2A1	NM_001844	0.000123379	0.389458	-0.275574	1.5856
PCDHAC2	NM_018899	0.000123964	-0.413906	-0.917661	1.4179
DPP9	NM_139159	0.000124713	-0.590711	-1.04834	1.3733
HERC6	NM_001165136	0.000124923	-0.509086	-0.999899	1.4052
EOMES	NM_005442	0.000135632	-0.743566	-1.18956	1.3623
LOC100288507		0.000135845	-0.744283	-1.11096	1.2894
VIPAR	NM_001193314	0.000137295	0.0387038	-0.162885	1.15
LOC387790	NM_001013634	0.000137447	-0.660279	-0.904218	1.1842
RACGAP1	NM_001126103	0.000138294	0.172948	-0.122387	1.2272
GPR82	NM_080817	0.000138508	-0.636811	-1.08173	1.3612
C1orf186	NM_001007544	0.000138654	-0.283591	-0.612249	1.2558
SLFN13	NM_144682	0.000138834	-0.691042	-1.02807	1.2632
PCDHB9	NM_019119	0.000139929	0.0499866	-0.626981	1.5988
TMEM155	NM_152399	0.000142049	-0.507937	-1.37675	1.8262
C11orf45	NM_145013	0.000142305	-0.239841	-0.618772	1.3004
FCRL4	NM_031282	0.000142342	-0.854014	-1.28079	1.3442
PIK3C2G	NM_004570	0.000142459	-0.266279	-0.894494	1.5457
TMEM27	NM_020665	0.000142648	-0.297974	-0.546057	1.1876
TMPRSS11B	NM_182502	0.000142915	-0.766086	-1.10336	1.2634
KCNK9	NM_016601	0.000144038	-0.349781	-0.732217	1.3035
ZNF703	NM_025069	0.00015511	-0.706501	-1.14977	1.3597
PLXDC1	NM_020405	0.000156369	0.243454	-0.34491	1.5035
BTBD8	NM_183242	0.00015639	-0.665165	-0.969662	1.235
LRRC3B	NM_052953	0.000156786	0.234671	-0.507148	1.6723
TLR3	NM_003265	0.000158603	0.0888741	-0.547947	1.5549
AKAP6	NM_004274	0.000159434	-0.073772	-0.505915	1.3492
SLC29A3	NM_001174098	0.000159723	-0.570927	-1.06233	1.4058
SYT9	NM_175733	0.000160451	-0.123278	-0.525712	1.3217
TMSB15B	NM_194324	0.00016324	0.303104	-0.210754	1.4279
LOC158696	NR_026935	0.000163707	-0.819736	-1.12707	1.2374
FGF20	NM_019851	0.000163765	-0.624673	-1.00785	1.3042
DYNLL1	NM_001037494	0.000164407	4.38223	2.1014	4.8596
NUSAP1	NM_001129897	0.00017501	-0.604978	-1.12646	1.4354
POM121L12	NM_182595	0.000175202	-0.496968	-1.32085	1.7702
RSG1	NM_030907	0.000176076	-0.337367	-0.651418	1.2432
TTLL10	NM_001130045	0.00017679	-0.724913	-1.12234	1.3172
PACRGL	NM_001130727	0.00017804	-0.495954	-0.733942	1.1793
NCRNA00271	NR_026805	0.000178743	0.0860914	-0.43431	1.4344
HAS3	NM_005329	0.000178936	-0.518772	-0.848325	1.2566
SOD1	NM_000454	0.000178995	3.68606	2.15759	2.8848
SCG5	NM_001144757	0.000179954	4.7296	2.32368	5.2997
ABCA17P	NR_003574	0.000180134	-0.404845	-0.853935	1.3652
STL	NR_026876	0.000180263	-0.718495	-0.962031	1.1839
C10orf90	NM_001004298	0.000183044	-0.670818	-1.23378	1.4773
KCNA3	NM_002232	0.000183346	-0.281714	-0.741159	1.375
LOC339400	XR_108352	0.000183595	-0.505313	-0.816888	1.2411
KIF18A	NM_031217	0.000195202	-0.638421	-1.12498	1.4011
TLR10	NM_001017388	0.000195332	-0.802869	-1.25464	1.3677
TMEM174	NM_153217	0.000195433	-0.56631	-0.832131	1.2023
TRIM63	NM_032588	0.000196446	-0.761063	-1.21459	1.3694
ZNF616	NM_178523	0.000196519	-0.407842	-0.70993	1.2329
CAMK1G	NM_020439	0.000196793	-0.252622	-0.585567	1.2596
TOP2A	NM_001067	0.000197183	-0.476254	-0.893417	1.3353
PEG10	NM_001040152	0.00019845	3.73222	1.91897	3.5143
RTP1	NM_153708	0.000199047	-0.712137	-1.04865	1.2627
MB21D2	NM_178496	0.000199167	-0.284505	-0.615676	1.258
PLCD3	NM_133373	0.000199293	-0.00192277	-0.367002	1.288
C2orf39	NM_145038	0.000199611	-0.464008	-0.719404	1.1937
FAM194A	NM_152394	0.00020066	-0.407096	-0.881959	1.3898
LOC100506781	XR_109551	0.00020126	-0.929175	-1.30733	1.2997
CRIP3	NM_206922	0.00020215	-0.192491	-0.864452	1.5932
ZNF883	NM_001101338	0.0002032	0.23094	-0.277594	1.4226
ZNF677	NM_182609	0.000204	-0.646833	-0.888291	1.1822
FDXACB1	NM_138378	0.00021542	-0.686472	-1.11503	1.3459
C1orf145	NM_001025495	0.00021544	0.0189278	-0.402013	1.3388
TMEM66	NM_016127	0.0002157	5.46489	1.73433	13.274
TMEM183B	NM_001079809	0.00021748	0.985559	0.865313	1.0869
LYPLA2P1	NR_001444	0.00021772	-0.134046	-0.271059	1.0996
B3GALT2	NM_003783	0.00021887	-0.128474	-0.509677	1.3024
LOC100505679	XM_003119016	0.00021926	0.402677	0.098179	1.235
CAPRIN1	NM_005898	0.00022007	0.245134	-0.135515	1.3019
SPATA9	NM_031952	0.00022014	-0.777659	-1.09268	1.244
VSTM1	NM_198481	0.0002215	-0.64822	-1.07591	1.3451
MED10	NM_032286	0.00022301	0.399942	0.116778	1.2169
OR1C1	NM_012353	0.00022386	-0.481455	-1.54245	2.0864
SPDYE2	NM_001031618	0.00022451	0.19907	0.042454	1.1147
HTRA3	NM_053044	0.00023524	-0.778541	-1.19867	1.338
CDRT4	NM_173622	0.00023546	-0.173928	-0.333587	1.117
RASEF	NM_152573	0.0002361	-0.106329	-0.779176	1.5942
SIRT5	NM_001193267	0.00023655	-0.180057	-0.346464	1.1223
LRG1	NM_052972	0.00023672	-0.654761	-1.05076	1.3159
LOC100506828	XR_108681	0.00023746	-0.269465	-0.471033	1.1499
LOC441204	NR_015364	0.00023817	-0.364007	-0.902867	1.4528
CA5B	NM_007220	0.00023954	-0.495241	-0.944161	1.365
C14orf23	NR_026731	0.00024017	-0.842695	-1.29521	1.3684
TBX21	NM_013351	0.00024024	-0.635098	-1.17881	1.4577
LOC440292	XM_496078	0.0002403	0.523527	0.393693	1.0942
TP53AIP1	NM_001195194	0.00024031	-0.540532	-0.94025	1.3193
LOC643763	NR_027378	0.00024093	-0.0647755	-0.773485	1.6343
GUSBL1	NR_003504	0.00024164	-0.679242	-0.905816	1.1701
PRICKLE2	NM_198859	0.00024299	1.04833	0.553412	1.4092
ARFRP1	NM_001134758	0.00024493	0.168159	-0.15412	1.2503
ZNF225	NM_013362	0.00025563	-0.455321	-0.687965	1.175
NXNL2	NM_001161625	0.00025721	-0.563904	-1.05719	1.4076
LOC100507466	XR_109173	0.00025756	-0.540481	-0.818945	1.2129
SLC30A6	NM_001193513	0.00025809	-0.455173	-0.62231	1.1228
LOC729291	XR_041492	0.00025844	-0.272892	-0.494092	1.1657
CDH23	NM_022124	0.00025859	-0.442526	-1.07363	1.5487
STAC	NM_003149	0.00025881	-0.0895122	-0.531015	1.358
FRMPD2	NM_001018071	0.00026097	-0.793262	-1.2112	1.336
COX4I2	NM_032609	0.00026149	-0.424419	-0.950811	1.4403
ZEB1	NM_001128128	0.00026175	-0.292077	-0.66589	1.2958
ZSWIM3	NM_080752	0.00026182	-0.183383	-0.517391	1.2605
FBXL17	NM_001163315	0.00026187	-0.37308	-0.691974	1.2474
HPCAL4	NM_016257	0.00026288	0.0543216	-0.455132	1.4235
GIPC2	NM_017655	0.00027523	-0.364803	-0.909369	1.4586
SRSF5	NM_001039465	0.00027528	3.34975	1.68588	3.1687
IL17RD	NM_017563	0.00027678	-0.609868	-1.12588	1.43
UCN3	NM_053049	0.00027701	-0.31834	-0.42742	1.0785
ZNF501	NM_145044	0.00027828	-0.380696	-0.728636	1.2727
C19orf51	NM_178837	0.00028041	-0.577803	-1.04062	1.3782
LOC645158	NR_033754	0.00028162	-0.728142	-0.975583	1.1871
LOC646548		0.00028281	-0.597606	-1.12824	1.4446
LY6G6F	NM_001003693	0.00028285	-0.363258	-0.740208	1.2986
LEMD1	NM_001001552	0.0002829	-0.725918	-1.09548	1.292
FLJ31958		0.00029517	-0.695631	-0.930757	1.177
TIGD4	NM_145720	0.00029525	-0.431665	-0.67563	1.1842
C19orf59	NM_174918	0.00029592	-0.690024	-1.144	1.3698
C22orf33	NM_178552	0.00029656	-0.854684	-1.65623	1.743
PCYT1B	NM_001163264	0.00029815	-0.179621	-0.804241	1.5418
FANCD2	NM_001018115	0.00029859	-0.553709	-1.0539	1.4144
AFAP1L1	NM_001146337	0.00029925	-0.6963	-1.02292	1.2541
WDR76	NM_001167941	0.00030023	-0.466553	-0.794659	1.2554
APOBEC3A	NM_001193289	0.00030153	-0.613255	-1.05915	1.3622
SNX12	NM_013346	0.00030305	-0.501844	-0.909398	1.3264
MKS1	NM_001165927	0.00030336	-0.16021	-0.303152	1.1042
CYP4Z1	NM_178134	0.00031615	-0.78015	-1.08685	1.2369
MARVELD3	NM_001017967	0.00031619	-0.643113	-0.899739	1.1947
LRRTM2	NM_015564	0.00031776	0.215788	-0.183407	1.3188
LOC26172	XM_934352	0.00031794	-0.456886	-1.04327	1.5015
MYO1H	NM_001101421	0.00032037	-1.07333	-1.41399	1.2663
ATAT1	NM_001031722	0.00032108	-0.337721	-0.669901	1.2589
SH2D1B	NM_053282	0.00032229	-0.887445	-1.28956	1.3214
NDUFA1	NM_004541	0.00032303	3.41103	1.78893	3.0782
LOC646778	XR_041105	0.0003367	-0.678472	-1.05918	1.302
FCRL5	NM_031281	0.0003377	-0.459193	-1.09494	1.5537
TMEM59L	NM_012109	0.00034097	0.652532	-0.0477525	1.6248
KLF8	NM_001159296	0.00034128	-0.222825	-0.627137	1.3235
LOC284014		0.00034147	-0.257151	-0.503006	1.1858
NODAL	NM_018055	0.00034455	-0.858196	-1.28087	1.3404
KLRAQ1	NM_001135629	0.0003552	0.875446	0.411678	1.3791
LOC100508909	XR_111329	0.00035712	-0.780566	-1.09728	1.2455
C14orf2	NM_001127393	0.00035716	3.39621	1.82953	2.9622
C9orf43	NM_152786	0.00035727	-0.548018	-0.768142	1.1648
SERINC2	NM_178865	0.00035768	-0.210952	-0.52025	1.2391
SULT4A1	NM_014351	0.0003579	-0.0441762	-0.231566	1.1387
RD3	NM_001164688	0.00035798	0.0789207	-0.633801	1.6389
LOC441666	NR_024380	0.00035809	-0.618787	-0.901064	1.2161
LOC100510377	XM_003121069	0.00035872	-0.608107	-0.77833	1.1252
CCDC37	NM_182628	0.00035922	-0.228479	-0.587677	1.2827
KIF15	NM_020242	0.0003617	-0.541408	-1.05271	1.4253
PATE2	NM_212555	0.00036234	-0.894794	-1.24901	1.2783
DEFB129	NM_080831	0.00036244	-0.430971	-0.943279	1.4263
FOXO6	XM_002342102	0.00036245	1.30395	0.803111	1.415
C12orf61	NM_175895	0.00036246	-0.722613	-1.08014	1.2812
KIF11	NM_004523	0.00036259	-0.225615	-0.691283	1.381
ACOT1	NM_001037161	0.00036282	1.34476	1.07719	1.2038
GSDMC	NM_031415	0.00036298	-0.823595	-1.21396	1.3107
RFX6	NM_173560	0.00036396	-0.869204	-1.25606	1.3075
DBIL5P2	NR_036635	0.00037559	-0.283787	-0.590571	1.2369
NAA60	NM_024845	0.00037707	0.166022	-0.0849466	1.19
SFRS11	NM_001190987	0.0003777	-0.111835	-0.643955	1.4461
ABT1	NM_013375	0.00038039	0.067981	-0.0989574	1.1227
KRTAP4-8	NM_031960	0.00038142	-0.842888	-1.06734	1.1683
LOC100506621	XR_108466	0.00038223	-0.257494	-0.790021	1.4465
C5orf13	NM_001142474	0.00039537	0.125668	-0.447227	1.4875
C5orf27	NR_026936	0.00039577	-0.810237	-1.03804	1.171
C1orf220	NR_033186	0.0003979	-0.79936	-1.12314	1.2516
LOC100508567	XR_111821	0.00039801	-0.418525	-0.930368	1.4259
BPIFB2	NM_025227	0.00039847	-0.374754	-0.627801	1.1917
PATE1	NM_138294	0.0004001	-0.517148	-1.29565	1.7154
SULT1C4	NM_006588	0.00040253	-0.584278	-0.854867	1.2063
CTC1	NM_025099	0.0004028	0.606582	0.305395	1.2322
CYP2S1	NM_030622	0.00040462	-0.553216	-1.09555	1.4563
GP6	NM_001083899	0.00041651	-0.531991	-0.872714	1.2664
FUBP1	NM_003902	0.00041689	-0.336954	-0.507743	1.1257
IRAK2	NM_001570	0.00041965	-0.347066	-0.801049	1.3698
NFYC	NM_001142587	0.00041974	-0.339719	-0.652232	1.2419
TESK2	NM_007170	0.00042018	-0.0434597	-0.312111	1.2047
C8orf46	NM_152765	0.00042133	-0.676107	-0.964013	1.2209
CCHCR1	NM_001105563	0.00042249	1.8013	-0.302145	4.2973
LRPAP1	NM_002337	0.00042257	2.53911	0.593158	3.8529
PAQR8	NM_133367	0.00042437	0.376191	-0.0662637	1.3589
CCDC121	NM_001142683	0.00043517	-0.369862	-0.598541	1.1718
ZRANB3	NM_032143	0.00043658	-0.500247	-0.891838	1.3118
ERLEC1	NM_001127397	0.00043675	1.52327	-0.514405	4.1058
PXK	NM_017771	0.00043793	2.28633	0.816756	2.7694
CKLF-CMTM1	NM_001204099	0.00043834	-0.895396	-1.47971	1.4993
KLB	NM_175737	0.00043901	-0.75798	-1.08129	1.2512
TCTEX1D1	NM_152665	0.00043902	-0.560938	-1.05554	1.4089
NDUFA4L2	NM_020142	0.00044164	-0.331656	-0.925569	1.5093
ACTR5	NM_024855	0.00044246	-0.193876	-0.545868	1.2763
C17orf53	NM_024032	0.00044436	-0.231167	-0.67877	1.3638
KLHDC8B	NM_173546	0.00045598	0.567087	0.0652229	1.416
SPIC	NM_152323	0.00045687	-0.521991	-1.42699	1.8725
FAM113B	NM_138371	0.00045793	0.157888	-0.467757	1.5429
SLC22A4	NM_003059	0.00045941	0.183914	-0.1606	1.2697
KCTD16	NM_020768	0.00046099	-0.556734	-0.82707	1.2061
CDYL2	NM_152342	0.00046341	-0.715692	-1.09591	1.3015
UNC5CL	NM_173561	0.00046362	-0.726408	-1.04011	1.2429
HEMGN	NM_018437	0.0004646	-0.961559	-1.22336	1.199
LOC100506082	XR_109054	0.00047589	-0.899507	-1.2109	1.2409
CPXCR1	NM_001184771	0.00047647	-0.733062	-1.14276	1.3284
ATL1	NM_001127713	0.00047682	1.27424	1.02166	1.1913
DTWD2	NM_173666	0.00048087	-0.310782	-0.447974	1.0998
DAPP1	NM_014395	0.0004809	-0.553383	-0.999557	1.3624
INHA	NM_002191	0.00048253	-0.16463	-0.798881	1.5521
RPL18	NM_000979	0.0004827	2.64311	-0.14799	6.9216
SLC35D3	NM_001008783	0.00048409	2.93261	-1.26507	18.35
FAM111B	NM_198947	0.00048493	-0.851074	-1.64156	1.7297
LOC645166	NR_027238	0.00049602	0.95584	0.259805	1.62
ACSM5	NM_017888	0.00049686	-0.692474	-1.16948	1.3919
TMEM159	NM_020422	0.00049732	-0.40542	-0.671088	1.2022
LOC283089	NR_033850	0.00049734	-0.894931	-1.15428	1.1969
LOC100289366		0.00049882	-0.777735	-1.10106	1.2512
ATG10	NM_001131028	0.00049953	1.61473	-0.501205	4.3347
TMEM217	NM_145316	0.00050041	-0.233766	-0.882157	1.5674
IQCC	NM_001160042	0.00050359	-0.109211	-0.251396	1.1036
RNF32	NM_001184996	0.00050414	-0.447528	-0.752843	1.2357
SBF2	NM_030962	0.00051625	-0.300478	-0.574821	1.2094
NAV1	NM_001167738	0.00051904	-0.467123	-0.888624	1.3393
ANKRD45	NM_198493	0.0005212	-0.235696	-0.5499	1.2433
EPS15L1	NM_021235	0.00052122	-0.101083	-0.34671	1.1856
LOC100508546	XR_111753	0.00052164	-0.329039	-0.563913	1.1768
PGLYRP3	NM_052891	0.00052182	-0.895816	-1.54375	1.5669
RHEBL1	NM_144593	0.00052218	-0.459787	-1.09662	1.5549
ZFX	NM_001145275	0.0005223	-0.405537	-0.762299	1.2805
HRH3	NM_007232	0.00052452	-0.505964	-1.02266	1.4307
TPD52L3	NM_033516	0.0005356	-0.421009	-1.15695	1.6655
LOC729177	NR_034143	0.00053571	-0.752663	-1.0607	1.238
LRGUK	NM_144648	0.00053671	-0.762489	-1.08289	1.2487
HAPLN3	NM_178232	0.00053978	-0.81835	-1.18542	1.2897
C2orf66	NM_213608	0.00054187	-0.279601	-0.595819	1.2451
ITM2B	NM_021999	0.00054488	3.56956	1.94321	3.0873
RUNX3	NM_001031680	0.00054491	1.25582	-0.779575	4.0993
SUGT1	NM_001130912	0.0005552	-0.608331	-0.840358	1.1745
DAPL1	NM_001017920	0.00055546	1.57677	0.835936	1.6711
TAS2R9	NM_023917	0.0005558	-0.697287	-1.17849	1.3959
C10orf107	NM_173554	0.00055698	0.0441962	-0.50965	1.468
MIR17HG	NR_027349	0.00055715	-0.80738	-1.00955	1.1504
MOB3A	NM_130807	0.00055755	0.626449	0.474346	1.1112
CACNG8	NM_031895	0.00055758	-0.101649	-0.763043	1.5816
PLA2G1B	NM_000928	0.00055906	0.163323	-0.417275	1.4955
DEPDC1	NM_001114120	0.00055959	-0.618647	-0.988675	1.2924
PIPOX	NM_016518	0.00056155	-0.0525937	-0.409534	1.2807
TIFA	NM_052864	0.00056436	-0.780214	-1.20878	1.3459
ABCG4	NM_001142505	0.00057674	-0.525134	-1.07187	1.4608
CTSL1P8	NR_033405	0.0005778	-0.301517	-0.564096	1.1996
AOAH	NM_001177506	0.00057854	-0.394924	-0.679438	1.218
IGSF8	NM_052868	0.00057959	0.292499	-0.136225	1.346
FAM40B	NM_001134336	0.00057989	0.741775	0.20319	1.4525
RNF152	NM_173557	0.00058128	-0.695739	-1.02007	1.2521
FAM135A	NM_001105531	0.00058222	-0.272368	-0.501818	1.1724
TECTA	NM_005422	0.00058251	-0.376766	-0.581841	1.1527
ACOT1	NM_001037161	0.00058379	0.345681	-0.049532	1.3151
CRYGD	NM_006891	0.00058455	-0.215339	-0.697956	1.3973
SARM1	NM_015077	0.00059563	0.13936	-0.161886	1.2322
IDI2	NM_033261	0.00059817	-0.473031	-1.23497	1.6958
LOC643749	NR_034108	0.00060039	-0.542622	-0.714539	1.1266
TREM2	NM_018965	0.00060241	-0.437289	-0.97214	1.4488
ACTL9	NM_178525	0.00060309	-0.82297	-1.20625	1.3043
ZCCHC5	NM_152694	0.00061873	-0.83908	-1.21084	1.2939
SEZ6L	NM_001184773	0.00062298	0.137784	-0.529868	1.5885
LOC728024	NR_003671	0.00062334	-0.22637	-0.405065	1.1319
ZNF223	NM_013361	0.00062361	-0.289448	-0.505322	1.1614
DARC	NM_001122951	0.0006356	-0.109647	-0.561918	1.3682
FAM104B	NM_001166699	0.00063561	-0.0438667	-0.302923	1.1967
LOC100507135	XM_003118891	0.00063721	-0.701834	-0.947283	1.1855
FAM92A3	NR_003612	0.00063888	0.0565028	-0.110073	1.1224
C12orf75	NM_001145199	0.00064133	0.589426	-0.0736575	1.5835
GTPBP6	NM_012227	0.0006417	0.221669	-0.0779529	1.2308
MARS2	NM_138395	0.00064222	-0.78654	-1.1995	1.3314
TMEM108	NM_001136469	0.00064224	0.422045	-0.319246	1.6717
MS4A8B	NM_031457	0.00064292	0.453823	-0.263639	1.6443
LOC387723	NR_034125	0.00064312	0.392476	-0.0113306	1.323
DLGAP5	NM_001146015	0.00065609	-0.517265	-0.974728	1.3731
PI4KAP2	NR_003700	0.00065989	0.431941	0.16635	1.2021
ING5	NM_032329	0.00066128	-0.652098	-0.839056	1.1384
HMGB4	NM_145205	0.00066329	-0.421623	-0.873969	1.3683
PLD3	NM_001031696	0.00066362	2.90045	0.908115	3.9788
TMEM71	NM_144649	0.00067573	2.86848	-0.686231	11.751
SLC12A1	NM_000338	0.00067688	-0.0366845	-0.585267	1.4626
PCNXL3	NM_032223	0.00068012	-0.651406	-0.857344	1.1534
NAALADL1	NM_005468	0.00068286	-0.172548	-0.444505	1.2074
LOC100509302	XR_113293	0.00068297	-0.545217	-0.990929	1.362
GJC1	NM_001080383	0.00069529	-0.198151	-0.598306	1.3196
SPINT2	NM_001166103	0.00069548	3.18401	1.74277	2.7155
FAM171A2	NM_198475	0.00069574	-0.816638	-1.0987	1.2159
DDX46	NM_014829	0.00069917	0.883408	0.324801	1.4728
TUBB1	NM_030773	0.00070031	-0.675632	-1.17317	1.4118
GTF2IRD2	NM_001003795	0.00070073	-0.653226	-1.13772	1.3991
PARVG	NM_001137605	0.00070429	-0.500462	-1.02892	1.4424
NFKBIL1	NM_001144961	0.0007048	-0.0682803	-0.416185	1.2727
PIP5KL1	NM_001135219	0.00071804	-0.615416	-1.13589	1.4344
GAPT	NM_152687	0.00071946	-0.63116	-0.970328	1.265
NR5A1	NM_004959	0.00072057	-0.367322	-0.851633	1.3989
TRIM49	NM_020358	0.00072206	-0.363677	-1.57374	2.3135
ZNF300	NM_001172831	0.00072351	-0.406434	-0.629494	1.1672
GTSF1	NM_144594	0.00073578	-0.48278	-1.23361	1.6828
IQGAP2	NM_006633	0.00073585	0.254075	-0.565541	1.7649
RPL31	NM_000993	0.0007361	-0.312962	-0.718535	1.3246
FAM82A1	NM_001170791	0.00073616	0.564916	0.211367	1.2777
METTL19	NM_152544	0.00073782	-0.0104996	-0.173703	1.1198
ASPM	NM_018136	0.00073873	-0.636617	-1.09609	1.375
LOC222159		0.0007391	-0.585005	-0.882536	1.229
LOC100506542	XR_109332	0.0007393	-0.873714	-1.63597	1.6961
ZNF430	NM_001172671	0.00074114	-0.222011	-0.470276	1.1878
HLA-B	NM_002117	0.00074292	0.538825	-1.31926	3.6253
SNX32		0.00075506	-0.429626	-0.862381	1.3498
ZNF701	NM_001172655	0.00075567	-0.484211	-0.920276	1.3529
LOC729799	NR_026952	0.00076327	-0.331904	-0.567102	1.1771
DHRS4	NM_021004	0.0007753	0.832524	0.686922	1.1062
RP1	NM_006269	0.000776	-0.816532	-1.22999	1.3319
ARHGAP31	NM_020754	0.00077608	-0.780673	-1.09195	1.2408
KCNA5	NM_002234	0.00078125	1.28854	0.435545	1.8062
NPAT	NM_002519	0.00078137	0.449727	-0.124288	1.4887
VN1R5	NM_173858	0.00078384	-0.519785	-1.24855	1.6572
GPR34	NM_001097579	0.00079528	0.12192	-0.382309	1.4184
DSTN	NM_001011546	0.00079791	2.48108	0.59231	3.7032
FLJ44896	XR_041619	0.00079897	0.0637987	-0.309373	1.2952
ZNF589	NM_016089	0.00081824	-0.171595	-0.366853	1.1449
C1orf64	NM_178840	0.0008226	-0.512057	-1.42526	1.8832
ZBTB7C	NM_001039360	0.00082261	0.221027	-0.219407	1.357
MYO3B	NM_001083615	0.00083674	-0.641922	-1.05178	1.3286
CDCA4	NM_017955	0.00083754	-0.577142	-0.900102	1.2509
SLC26A9	NM_052934	0.0008382	-0.454344	-0.946516	1.4066
CCDC89	NM_152723	0.00085533	-0.416297	-0.66761	1.1903
SH3GL1P1	NR_033412	0.00085935	-0.759063	-0.984568	1.1692
VKORC1L1	NM_173517	0.00085969	1.48213	0.673658	1.7514
LOC100129198	XM_001719139	0.0008631	-0.871126	-1.07175	1.1492
NCRNA00204B	NR_027402	0.00088109	-0.442489	-0.611269	1.1241
LRFN1	NM_020862	0.00088112	-0.846606	-1.09925	1.1914
DYNC1H1	NM_001376	0.00088131	1.65427	0.738521	1.8865
CALML6	NM_138705	0.00088291	-0.568833	-0.911325	1.2679
DEPDC1B	NM_001145208	0.0008838	-0.622139	-1.05997	1.3546
ZIK1	NM_001010879	0.00089634	-0.243208	-0.507854	1.2013
TPTE2P1	NR_026730	0.00089895	-0.797425	-1.10486	1.2375
NDUFB4	NM_001168331	0.00090153	3.0653	0.913493	4.4438
SLC16A14	NM_152527	0.00090318	0.545871	-0.0190978	1.4794
ARMC2	NM_032131	0.00090322	-0.137883	-0.317776	1.1328
FLJ35409	XR_110478	0.00090488	-0.567069	-0.898824	1.2585
VSTM2A	NM_182546	0.00091504	-0.709975	-1.1284	1.3365
FANCM	NM_020937	0.00091979	0.0648055	-0.213612	1.2129
LOC284578	NR_027086	0.00092253	-0.78759	-1.09055	1.2337
CNBD1	NM_173538	0.00092254	-0.774732	-1.11931	1.2698
CHRNG	NM_005199	0.00093662	-0.694008	-1.20855	1.4285
SUN3	NM_001030019	0.00093681	-0.349835	-0.960271	1.5267
CHRDL2	NM_015424	0.00093757	-0.449844	-1.13546	1.6084
RAB2A	NM_002865	0.00093762	0.530074	-0.107394	1.5556
CENPVL1	NR_033772	0.00094011	-0.781481	-1.13773	1.2801
LOC100506080	XR_108949	0.00094292	-0.51562	-0.695778	1.133
TSGA10	NM_025244	0.00095559	0.249312	-0.132821	1.3033
MC3R	NM_019888	0.00095735	-0.739455	-1.25421	1.4288
MAGEB18	NM_173699	0.00095809	-0.732537	-1.12618	1.3137
ORMDL1	NM_001128150	0.00096204	0.678943	0.404671	1.2094
MTBP	NM_022045	0.00096224	-0.863727	-1.18342	1.2481
ZNF192	NM_006298	0.00096325	-0.473478	-0.851463	1.2995
ZWINT	NM_001005413	0.00098219	0.0396714	-0.22766	1.2036
IGIP	NM_001007189	0.00098443	2.11719	1.01854	2.1416
ZNF114	NM_153608	0.00099567	-0.836427	-1.15969	1.2512
KIAA0408	NM_014702	0.00099594	-0.39332	-0.707472	1.2433
JAKMIP2	NM_014790	0.00099692	0.251811	-0.100844	1.2769
SHC2	NM_012435	0.00099849	1.76486	1.25321	1.4257
UBB	NM_018955	0.00101536	2.63037	0.582163	4.1359
SMOC1	NM_001034852	0.00101748	-0.587004	-1.18176	1.5102
ZNF367	NM_153695	0.00101822	-0.493849	-0.901243	1.3263
LRRC33	NM_198565	0.00101911	-0.456043	-0.679944	1.1679
PRAC	NM_032391	0.00101934	-0.517163	-1.29749	1.7175
IZUMO1	NM_182575	0.00102338	-0.542914	-1.5104	1.9554
GPR21	NM_005294	0.0010234	-0.68844	-1.13209	1.36
BTBD11	NM_001017523	0.00102454	0.371745	-0.251088	1.5399
FAM171A1	NM_001010924	0.00103724	0.683811	0.195745	1.4026
DTL	NM_016448	0.00103847	-0.532814	-0.947507	1.333
NDE1	NM_001143979	0.00104123	-0.630115	-1.10269	1.3876
FAM184B	NM_015688	0.00104211	-0.75409	-1.20509	1.367
FAIM2	NM_012306	0.00104345	1.54868	0.658317	1.8536
NME9	NM_178130	0.00104485	-0.744038	-1.11319	1.2916
LOC253039	NR_024408	0.00105595	-0.618356	-0.974493	1.28
AVL9	NM_015060	0.00105618	-0.0878585	-0.265459	1.131
LOC100505774	XR_109967	0.00105855	-0.948698	-1.2801	1.2582
IGSF11	NM_001015887	0.00105912	-0.400652	-0.953422	1.4669
ELL3	NM_001033517	0.00106017	-0.187795	-0.42149	1.1758
SEC11C	NM_033280	0.00106322	3.66616	2.07027	3.0228
LOC728264	NR_027180	0.00106367	-0.795793	-1.09114	1.2272
IL36B	NM_173178	0.00106435	-0.62492	-1.10386	1.3937
USP44	NM_001042403	0.00107547	-0.383138	-0.610941	1.171
SIGLEC11	NM_052884	0.00107999	-0.445609	-0.987958	1.4563
ZNF498	NM_145115	0.00108076	-0.200357	-0.424046	1.1677
PCDHGC3	NM_002588	0.00108123	-0.587753	-1.00951	1.3396
OR10A4	NM_207186	0.00108307	-0.568824	-1.46079	1.8557
ATP5F1	NM_001688	0.00108491	0.158894	-0.32117	1.3948
KCNA7	NM_031886	0.00110082	-0.568173	-1.52596	1.9423
LOC151658	NR_015414	0.001101	-0.79869	-1.18936	1.311
PLGLB1	NM_001032392	0.00110336	0.325274	0.130066	1.1449
NRG1	NM_001159995	0.00110456	0.267551	-0.314115	1.4966
KDM4D	NM_018039	0.00110497	-0.460642	-0.952981	1.4067
OTOP1	NM_177998	0.00111742	-0.598241	-1.57637	1.9699
CRYBA1	NM_005208	0.00111744	-0.534722	-0.990111	1.3712
LOC100291323		0.00111846	-1.12253	-1.60327	1.3955
LOC283713		0.00111959	-0.687063	-0.88592	1.1478
MOBKL2A	NM_130807	0.00111988	-0.768601	-1.02535	1.1948
SENP6	NM_001100409	0.00112043	0.243426	-0.107358	1.2753
DHRS4L1		0.0011211	0.144334	0.00962036	1.0979
C14orf50	NM_172365	0.00112272	0.249042	-0.219229	1.3835
PABPC4L	NM_001114734	0.00112456	-0.0492542	-0.603377	1.4683
NTM	NM_001048209	0.00113617	-0.506756	-1.0169	1.4242
ZNF808	NM_001039886	0.00113702	-0.298841	-0.52018	1.1658
CTNNA3	NM_001127384	0.0011409	-0.629999	-0.994725	1.2876
SLC25A41	NM_173637	0.00114287	-0.358633	-0.728779	1.2925
SUV39H1	NM_003173	0.00115718	-0.379989	-0.801743	1.3396
EDDM3A	NM_006683	0.00115861	-0.115513	-0.999341	1.8453
ST8SIA5	NM_013305	0.00116283	-0.437944	-1.01008	1.4867
LOC158435	NR_033838	0.00116434	-0.642894	-1.30931	1.5871
NHEJ1	NM_024782	0.00117586	-0.528762	-0.839649	1.2405
ITPR2	NM_002223	0.00117759	-0.330585	-0.829433	1.4131
PAQR4	NM_152341	0.00117875	-0.471267	-0.954827	1.3982
IDH1	NM_005896	0.00118036	0.757337	-0.163744	1.8935
OR2C1	NM_012368	0.00118047	-0.632749	-1.24042	1.5238
C15orf48	NM_032413	0.00118096	-0.625475	-1.21486	1.5046
PRSS58	NM_001001317	0.00118218	-0.530958	-1.5692	2.0537
KLHL31	NM_001003760	0.00118436	-0.743231	-0.986414	1.1836
MTMR14	NM_001077525	0.00119508	-0.502515	-0.862157	1.2831
TP73	NM_001126240	0.00119961	-0.632459	-1.00071	1.2908
CASP14	NM_012114	0.00120215	-0.437851	-1.0013	1.4778
TLE4	NM_007005	0.00121517	1.27767	0.121875	2.2281
CD300LF	NM_139018	0.00121779	-0.503998	-1.49383	1.986
CLEC2L	NM_001080511	0.00122187	-0.75761	-1.53855	1.7182
LOC100505619	NR_038233	0.00122193	-1.05336	-1.162	1.0782
ADAMTS8	NM_007037	0.00122379	-0.642037	-1.17574	1.4476
ZNF695	NM_020394	0.00122463	-0.639342	-0.924012	1.2181
PRKCG	NM_002739	0.00124363	-0.562932	-0.946943	1.305
FAM19A4	NM_001005527	0.00125533	-0.215064	-0.650136	1.352
SCUBE1	NM_173050	0.00125659	-0.520242	-0.775992	1.194
LRRC29	NM_012163	0.00125854	-0.267632	-0.510234	1.1831
ZNF662	NM_001134656	0.00125935	0.0300247	-0.36697	1.3168
XYLT1	NM_022166	0.00126294	0.0648393	-0.37545	1.3569
NHEDC1	NM_001100874	0.00127699	-0.577272	-0.792138	1.1606
CYP2C18	NM_000772	0.00127952	-0.464773	-0.932333	1.3828
EGLN3	NM_022073	0.00127954	-0.192397	-0.615245	1.3406
CLUL1	NM_014410	0.00128217	-0.0152238	-0.339676	1.2522
LOC388820	XR_109669	0.00128323	-0.950716	-1.27021	1.2479
LOC344595	NR_028301	0.00129824	0.751371	0.29082	1.3761
ST6GAL2	NM_001142351	0.00129992	-0.785058	-1.11546	1.2574
MYOCD	NM_001146312	0.0013174	-0.916866	-1.15835	1.1822
GPR85	NM_001146265	0.001319	-0.0158885	-0.531144	1.4292
COL5A3	NM_015719	0.00131968	-0.577942	-0.957658	1.3011
LOC100129436		0.00132022	-0.618804	-0.820323	1.1499
BAG1	NM_001172415	0.00132201	1.55906	0.0767024	2.794
MAMDC2	NM_153267	0.00132475	-0.456347	-0.82817	1.294
LOC442075	XR_110030	0.00133624	-0.958711	-1.28187	1.2511
VEGFC	NM_005429	0.0013382	-0.0813067	-0.546892	1.3809
PQLC2	NM_001040125	0.00133945	-0.528802	-0.994268	1.3808
L2HGDH	NM_024884	0.00133997	-0.3382	-0.878873	1.4547
TCEAL2	NM_080390	0.00134326	2.99467	2.19075	1.7458
MMP21	NM_147191	0.00134465	-0.423611	-0.802455	1.3003
FLJ36116		0.00135628	-0.937029	-1.59496	1.5778
HIST2H2BE	NM_003528	0.00136287	1.7064	0.990202	1.6429
LOC285033	NM_001037228	0.00136341	-0.877166	-1.1653	1.2211
SMCR8	NM_144775	0.00137788	-0.162555	-0.375038	1.1587
NKAIN3	NM_173688	0.00138037	-0.827645	-1.21868	1.3113
STAG3L2	NR_040584	0.00138328	0.831989	0.65756	1.1285
OR1Q1	NM_012364	0.00139576	-0.451436	-1.45891	2.0104
FAM126A	NM_032581	0.00139707	-0.591447	-1.10345	1.426
TNFRSF10A	NM_003844	0.00141555	-0.788392	-1.14976	1.2846
PPP1R14D	NM_001130143	0.00141566	-0.715722	-1.15803	1.3588
CCDC138	NM_144978	0.00142032	-0.498865	-0.902821	1.3231
IFITM10	NM_001170820	0.00142138	-0.27454	-0.715593	1.3576
LOC100288139	XM_002342856	0.00142253	-0.743733	-0.9424	1.1476
ZNF780A	NM_001005851	0.00143524	-0.308777	-0.588576	1.214
FAM46A	NM_017633	0.00143661	3.13692	1.20792	3.8079
MS4A6A	NM_022349	0.00143847	-0.473635	-0.919126	1.3618
ABHD16A	NM_021160	0.00143974	1.26656	0.796351	1.3853
SNX20	NM_182854	0.00144075	-0.526643	-1.31659	1.729
G6PC2	NM_001081686	0.00144279	-0.683083	-1.10241	1.3373
OR7E104P		0.00144297	0.0457218	-0.0489681	1.0678
AHSP	NM_016633	0.00145611	-0.526201	-1.07054	1.4584
BAG6		0.00145967	2.18025	2.04699	1.0968
DUSP27	NM_001080426	0.00146022	-1.01738	-1.3278	1.2401
SLC35F5	NM_025181	0.00146277	-0.481506	-0.893373	1.3304
RASGEF1C	NM_175062	0.00146404	-0.332803	-0.863484	1.4446
LOC100507063	XR_110052	0.00146442	-0.740857	-1.00922	1.2044
ATP6V0E1	NM_003945	0.00147732	1.56939	0.00103853	2.9657
TMPRSS13	NM_001077263	0.00147885	-0.742164	-1.14276	1.3201
DCLRE1B	NM_022836	0.00147984	-0.275398	-0.467851	1.1427
PLD4	NM_138790	0.00148049	-0.748281	-1.25338	1.4192
HNRNPC	NM_001013631	0.00148084	-0.264207	-0.359266	1.0681
TUBGCP3	NM_006322	0.00148323	-0.317524	-0.60135	1.2174
BPA-1		0.00148408	-0.399345	-0.593934	1.1444
SKP2	NM_005983	0.00149532	-0.429334	-0.745189	1.2447
NDUFA12	NM_018838	0.00149559	2.4522	1.98153	1.3858
CLDN15	NM_001185080	0.00149648	-0.248185	-0.382739	1.0978
AMHR2	NM_001164690	0.00149696	-0.440192	-0.967458	1.4412
MLLT10	NM_001195626	0.00150005	-0.297089	-0.612953	1.2448
SEC14L4	NM_001161368	0.00150257	-0.550888	-1.05333	1.4166
C12orf54	NM_152319	0.00150403	-0.620646	-1.0393	1.3367
NEK9	NM_033116	0.00152142	-0.247788	-0.407426	1.117
C10orf140	NM_207371	0.00152256	-0.310693	-0.511319	1.1492
LOC100270804	NR_026885	0.00152294	-0.192917	-0.453039	1.1976
ZNF597	NM_152457	0.00152437	-0.614139	-1.01056	1.3162
STON2	NM_033104	0.00153521	-0.332274	-0.673118	1.2665
LOC100129550	NR_024618	0.00154007	0.720967	0.358446	1.2857
SEPSECS	NM_016955	0.00154436	-0.567868	-0.74407	1.1299
LOC728804		0.00155702	-0.627346	-0.783593	1.1144
FAM138A	NR_026818	0.00156329	-0.939803	-1.30301	1.2863
LOC646509		0.00157548	-0.15089	-0.365812	1.1606
PSMB6	NM_002798	0.00157663	2.46978	1.24708	2.3338
LOC100049716	XR_109114	0.00157905	-0.849715	-1.14679	1.2287
CD200R1	NM_138806	0.00157958	-0.865013	-1.0901	1.1688
TM7SF2	NM_003273	0.00158243	0.471393	0.0611228	1.3289
C6orf163	NM_001010868	0.00158471	-0.564369	-0.817618	1.1919
LOC100505592	XR_109463	0.00159808	-0.880537	-1.5949	1.6408
ELOVL3	NM_152310	0.00159864	-0.539801	-1.33155	1.7312
CDCA8	NM_018101	0.00160376	-0.0802212	-0.271228	1.1416
NOX4	NM_001143836	0.00160439	-0.528671	-0.944405	1.334
ELOVL2	NM_017770	0.00161734	-0.442063	-0.880076	1.3547
ADAD1	NM_001159285	0.00161747	-1.12845	-1.3954	1.2033
FAM71C	NM_153364	0.00161847	-0.531876	-1.36344	1.7796
CAMK2N1	NM_018584	0.00162128	1.49827	0.250109	2.3754
ACOT2	NM_006821	0.00164203	1.25753	0.998507	1.1967
SLC9A9	NM_173653	0.0016565	-0.399263	-0.850444	1.3672
FAM123C	NM_001105193	0.00165856	-0.145069	-0.436008	1.2234
LOC100129122		0.00167536	-0.231985	-0.535625	1.2343
EPHB6	NM_004445	0.00167557	0.235406	-0.314842	1.4643
KIAA1328	NM_020776	0.00168025	-0.0283006	-0.273264	1.1851
PRC1	NM_003981	0.00168211	-0.181603	-0.746347	1.4791
ENAM	NM_031889	0.00168391	-0.617436	-1.06474	1.3635
SIN3A	NM_001145357	0.00168452	-0.0718733	-0.49982	1.3453
C9orf47	NM_001001938	0.00169806	-0.846407	-1.17289	1.2539
SNX33	NM_153271	0.00171598	-0.385149	-0.5809	1.1453
C8orf42	NM_175075	0.00171668	0.10379	-0.171282	1.2101
CXorf36	NM_024689	0.00171867	-0.767057	-1.2778	1.4248
ROMO1	NM_080748	0.00172066	2.56495	1.55364	2.0157
ZNF19	NM_006961	0.00172092	-0.516872	-0.829445	1.2419
APH1A	NM_001077628	0.00172336	-0.257439	-0.737017	1.3943
IMPDH1	NM_000883	0.00172344	-0.104691	-0.310054	1.153
LOC100652828	XR_132802	0.00172464	1.22857	1.02966	1.1478
ELP2P	NR_024120	0.00173583	-0.77797	-1.03906	1.1984
FAM155B	NM_015686	0.00174376	0.166745	-0.251993	1.3368
DBNDD1	NM_001042610	0.00175935	-0.323171	-0.758895	1.3526
ANKRD13B	NM_152345	0.00176147	-0.127122	-0.28702	1.1172
PGLYRP4	NM_020393	0.00176329	-0.698564	-1.24366	1.4591
LOC100652876	XR_132602	0.00176348	-0.339707	-0.733905	1.3142
PLD2	NM_002663	0.00176374	-0.253866	-0.398662	1.1056
ZNF865	NM_001195605	0.00176426	-0.340498	-0.505326	1.121
SFRP5	NM_003015	0.00177711	-0.699712	-1.14338	1.3601
ZFP42	NM_174900	0.00178389	-0.539261	-1.05734	1.432
PARP1	NM_001618	0.00178468	2.03085	0.859786	2.2518
TP73-AS1	NR_033711	0.00178483	0.329736	0.0573092	1.2078
MTMR7	NM_004686	0.00179941	-0.202863	-0.404372	1.1499
SPDYA	NM_001008779	0.00180081	-0.97531	-1.19288	1.1628
CLECL1	NM_172004	0.00180405	-0.45366	-1.00981	1.4703
MORN3	NM_173855	0.00181779	-0.604591	-0.987728	1.3042
GRIN2A	NM_000833	0.00181782	-0.481699	-0.8751	1.3135
ANKRD6	NM_014942	0.00181837	0.215552	-0.0306622	1.1861
LOC440300	NR_033738	0.00182029	0.0116048	-0.191506	1.1512
SLC12A8	NM_001195483	0.00182162	-0.325479	-0.599731	1.2094
LOC100132726	XR_109167	0.00182346	-0.272037	-0.572327	1.2314
SNORD22	NR_000008	0.00183828	-0.0337834	-0.278408	1.1848
CADM3	NM_001122951	0.00184035	-0.942917	-1.257	1.2432
GRID2	NM_001510	0.00184411	-0.451215	-1.03441	1.4982
LACRT	NM_033277	0.00185527	-0.548093	-1.47404	1.8999
TAS2R10	NM_023921	0.00185528	-0.309333	-0.830851	1.4355
ZNF324B	NM_207395	0.0018554	-0.446093	-0.790489	1.2696
STK17A	NM_004760	0.00186307	-0.0434155	-0.234089	1.1413
LOC100505888	XR_108532	0.00186371	0.995806	0.546647	1.3652
DIAPH3	NM_001042517	0.00187738	-0.523861	-0.863989	1.2659
AKNA	NM_030767	0.00188158	-0.641338	-1.03981	1.3181
SCN2B	NM_004588	0.00188374	-0.0540268	-0.570881	1.4308
UQCR10	NM_001003684	0.00189693	0.811442	0.216908	1.51
TMEM213	NM_001085429	0.00191566	-0.892146	-1.18037	1.2211
CEP192	NM_032142	0.00191602	0.0895571	-0.194601	1.2177
ZNF395	NM_018660	0.00191729	0.00077049	-0.734894	1.6652
CLEC4G	NM_198492	0.0019179	-0.400139	-0.945167	1.459
LOC100133612	NR_024455	0.00191868	-0.697889	-0.891726	1.1438
HCRP1	XM_001722898	0.00191914	-0.208803	-0.563137	1.2784
C11orf76	XR_110890	0.00192271	-0.680724	-0.857898	1.1307
MAGI1	NM_001033057	0.00192295	-0.283137	-0.507517	1.1683
ATAD2	NM_014109	0.00192446	-0.302202	-0.633388	1.258
LOC400680	XR_109581	0.00195535	-0.885579	-1.16431	1.2131
SERPINI1	NM_001122752	0.00195737	2.21922	1.07457	2.2109
AIM1	NM_001624	0.00195769	0.142577	-0.412112	1.4689
LOC100506649	XR_109139	0.00195794	0.0818891	-0.559246	1.5596
ZNF479	NM_033273	0.00195995	-0.793729	-0.976266	1.1349
LOC100506472	NR_040535	0.00197621	-0.320692	-0.56896	1.1878
CPA5	NM_001127441	0.00198389	-0.529734	-1.06295	1.4472
C7orf10	NM_001193311	0.00199771	-0.541345	-0.927351	1.3068
HHIP	NM_022475	0.00199835	-0.765058	-1.0612	1.2279
ETNK2	NM_018208	0.00199964	0.340436	-0.0291896	1.292
CTU1	NM_145232	0.0020012	-0.338482	-0.540954	1.1507
FLOT2	NM_004475	0.0020016	-0.240537	-0.563992	1.2513
C1QL1	NM_006688	0.0020024	-0.463761	-0.890479	1.3442
IL34	NM_001172771	0.0020025	-0.500953	-0.983441	1.3972
C21orf37	NM_001005521	0.0020187	-0.832868	-1.17305	1.2659
LOC100506767	XR_110298	0.0020224	-0.857089	-1.10814	1.1901
LOC100192378	NR_024360	0.0020382	-0.419826	-0.717207	1.2289
RP1L1	NM_178857	0.0020389	-0.870605	-1.25659	1.3067
SRRM2	NM_016333	0.0020575	-0.303858	-0.801192	1.4116
SURF1	NM_003172	0.002059	0.978833	0.118037	1.816
HDX	NM_001177478	0.0020623	-0.377285	-0.669734	1.2247
FLJ30838	NR_033873	0.0020625	-0.766778	-0.974929	1.1552
HIST1H2AD	NM_021065	0.0020794	1.78591	1.28484	1.4153
GNB3	NM_002075	0.002084	0.929825	0.426824	1.4172
LOC400590	XR_109453	0.0020842	-0.741288	-0.937061	1.1453
PRIM2	NM_000947	0.0020963	-0.497828	-0.82045	1.2506
LOC253842	NM_001489	0.0021004	-0.944816	-1.25811	1.2425
KIAA0090	NM_015047	0.0021019	-0.206353	-0.454326	1.1875
EBF2	NM_022659	0.0021035	-0.670192	-1.04394	1.2957
SNRNP70	NM_003089	0.0021196	0.376913	-0.520247	1.8624
LOC100130992	XM_001722099	0.0021218	-0.782675	-1.02028	1.179
DKFZP547L112		0.0021363	-0.478374	-0.891084	1.3312
CALHM2	NM_015916	0.0021369	0.0234685	-0.327852	1.2757
DEFB123	NM_153324	0.0021375	-0.479125	-1.04083	1.476
PAGE5	NM_130467	0.0021394	-0.527176	-1.25436	1.6554
LOC344887	NR_033752	0.0021415	-1.11476	-1.41328	1.2299
LOC284630		0.002157	-0.834662	-1.06747	1.1751
C11orf44	XR_110537	0.0021581	-1.07527	-1.33059	1.1936
EPN3	NM_017957	0.00216	-0.498516	-1.05706	1.4728
MCF2	NM_001099855	0.0021625	0.122786	-0.316578	1.356
LOC150197	NR_026919	0.0021766	-0.875335	-1.10115	1.1694
LINC00277	NR_026949	0.0021772	-0.468788	-1.15828	1.6127
TMEM72	NM_001123376	0.0021778	-1.03759	-1.32375	1.2194
GPR114	NM_153837	0.0021839	-0.963318	-1.22176	1.1962
CLSPN	NM_001190481	0.0021848	-0.729621	-1.15773	1.3455
FOXA3	NM_004497	0.0021954	-0.397027	-0.701097	1.2346
NKX6-3	NM_152568	0.0021989	-0.737831	-1.20387	1.3813
ARHGAP20	NM_020809	0.0022	-0.0890746	-0.791253	1.627
IQCF2	NM_203424	0.0022016	-0.415534	-0.789641	1.296
C3orf57	NM_001040100	0.0022161	-0.738039	-0.963752	1.1694
GINS4	NM_032336	0.00222	-0.597855	-0.962635	1.2877
MTMR8	NM_017677	0.0022209	-0.433041	-0.984625	1.4657
CTDP1	NM_004715	0.0022356	-0.379697	-0.562434	1.135
FAM72A	NM_001100910	0.0022386	-0.627735	-0.917382	1.2223
SUV39H2	NM_001193424	0.0022402	-0.647906	-1.08587	1.3547
MDS2	NR_027042	0.0022573	-1.02299	-1.35367	1.2576
LOC402778	NM_001170820	0.0022606	-0.873571	-1.16471	1.2236
CDHR1	NM_001171971	0.0022643	-0.394456	-0.839629	1.3615
ZCCHC4	NM_024936	0.0022782	-0.637205	-0.902503	1.2019
ZNF702P	NR_003578	0.00228	-0.671243	-0.964438	1.2254
TSPEAR	NM_144991	0.0022996	-0.441578	-0.970783	1.4431
CHRM1	NM_000738	0.0023025	-0.382265	-0.645749	1.2004
KLHDC9	NM_001007255	0.0023192	1.33551	1.05081	1.2182
PNMAL2	NM_020709	0.0023198	0.511308	0.207674	1.2342
CEP170	NM_001042404	0.0023213	-0.454536	-0.743687	1.2219
KLF17	NM_173484	0.002323	-0.551305	-1.54088	1.9856
ZAR1	NM_175619	0.0023376	-0.427098	-0.846649	1.3375
FAM188B	NM_032222	0.0023381	0.256273	-0.0681291	1.2521
MOCS3	NM_014484	0.0023439	-0.287325	-0.666319	1.3004
TADA2A	NM_001166105	0.0023579	-0.242281	-0.489066	1.1866
PLB1	NM_001170585	0.002363	-0.775815	-1.03891	1.2001
TTI2	NM_025115	0.0023772	0.0964996	-0.114829	1.1578
LOC100131199	NM_001195278	0.0023796	0.00449783	-0.241359	1.1858
PCDHB2	NM_018936	0.0023806	-0.0695624	-0.409004	1.2653
SBK1	NM_001024401	0.0023828	-0.250424	-0.562493	1.2415
SLC38A4	NM_001143824	0.0023831	-0.690751	-1.10444	1.3321
LOC100507263	XR_109374	0.0024011	-0.879258	-1.14481	1.2021
BIN2	NM_016293	0.0024026	-0.241371	-0.550306	1.2388
TCP1	NM_001008897	0.0024035	0.636307	0.200998	1.3522
CNPY1	NM_001103176	0.0024048	-0.878459	-1.16663	1.2211
SPATA3	NM_139073	0.0024049	-0.476003	-0.993156	1.4311
LOC144486	NR_027035	0.0024176	-0.473709	-0.792606	1.2474
UBQLN3	NM_017481	0.0024177	-0.733281	-1.17398	1.3573
C1orf51	NM_144697	0.0024196	0.553994	0.0654816	1.403
LOC348751	NR_034096	0.0024353	-0.735563	-0.930103	1.1444
MPP2	NM_005374	0.0024363	0.297523	0.0315336	1.2025
POLE2	NM_001197330	0.0024368	-0.551357	-0.924539	1.2952
TSSK4	NM_001184739	0.0024445	-0.80649	-1.03659	1.1729
ULBP2	NM_025217	0.0024555	-0.584415	-0.939935	1.2794
LOC100132273	NR_034118	0.0024562	-0.905028	-1.20311	1.2295
SEMA6A	NM_020796	0.0024574	0.105588	-0.265674	1.2935
LOC400238	NR_033986	0.0024575	-0.832814	-1.06828	1.1773
CCDC71	NM_022903	0.002458	-0.284264	-0.690673	1.3254
SLC23A2	NM_005116	0.0024605	-0.0542748	-0.599634	1.4594
LOC158434		0.0024644	-0.769411	-0.962811	1.1435
LOC100506798	XR_108399	0.0024783	-0.807677	-1.44711	1.5577
LOC100506124	NR_045375	0.0024806	0.304704	0.127446	1.1307
LOC282997	NR_026932	0.0024807	-0.195746	-0.490256	1.2265
GADL1	NM_207359	0.0024825	-0.847301	-1.13457	1.2203
BRIP1	NM_032043	0.002497	-0.673428	-1.12063	1.3634
LOC283483	XR_109153	0.0024976	-0.754832	-0.948768	1.1439
LRRC18	NM_001006939	0.0025024	-0.452293	-0.983093	1.4447
APOBEC3G	NM_021822	0.0025186	0.00433365	-0.292262	1.2282
RGS18	NM_130782	0.0025191	-0.471538	-0.988784	1.4312
SLFN12	NM_018042	0.0025213	-0.708688	-1.02438	1.2446
TAF8	NM_138572	0.0025244	-0.308546	-0.513307	1.1525
FAM47B	NM_152631	0.0025622	-0.621934	-1.60085	1.971
CLEC12B	NM_001129998	0.0025773	-0.99314	-1.62675	1.5514
SNTN	NM_001080537	0.0025774	-0.894242	-1.57598	1.6041
ERICH1	NM_207332	0.0025783	-0.650404	-0.863718	1.1593
LOC646268	NR_033946	0.002579	-0.857876	-1.10461	1.1865
PRTG	NM_173814	0.0025803	-0.073653	-0.600976	1.4413
GSTM2P1	NR_002932	0.0025977	0.136593	-0.197696	1.2608
ATF6B	NM_001136153	0.0026034	-0.610589	-1.01815	1.3264
LGALS2	NM_006498	0.0026048	-0.428298	-0.926288	1.4122
CAPN8	NM_001143962	0.0026049	-0.956054	-1.27917	1.251
CCDC114	NM_144577	0.0026217	-0.688874	-1.11803	1.3464
SAA2	NM_030754	0.0026219	0.735708	-0.0401301	1.7122
P2RY4	NM_002565	0.0026222	-0.602016	-1.13748	1.4494
ZNF804B	NM_181646	0.002636	-0.208073	-1.56877	2.5681
OR5P2	NM_153444	0.0026395	-1.01328	-1.67466	1.5816
FCRL1	NM_052938	0.0026414	-0.918277	-1.65422	1.6655
CCNB1	NM_031966	0.0026426	-0.0438414	-0.323329	1.2138
TGM7	NM_052955	0.0026427	-0.407033	-0.90577	1.413
FLJ36665	XR_110048	0.0026595	-0.686133	-0.860832	1.1287
ZSCAN22	NM_181846	0.0026771	-0.488816	-0.647418	1.1162
LOC256021		0.0026955	-0.916031	-1.20796	1.2243
ELP1P	NR_036635	0.0026965	-0.988396	-1.28734	1.2302
CSGALNACT2	NM_018590	0.0026996	-0.465268	-0.721022	1.194
SLC9A11	NM_178527	0.0027001	-0.964169	-1.19179	1.1709
GABRQ		0.0027155	-0.411353	-1.1017	1.6137
DAB1	NM_021080	0.0027241	-0.391947	-0.737044	1.2702
SRR	NM_021947	0.0027355	-0.199437	-0.505071	1.236
C21orf70	NM_058190	0.0027355	-0.880623	-1.17813	1.229
TM6SF1	NM_001144903	0.0027376	-0.293497	-0.572764	1.2136
MIR137HG		0.0027585	-0.315715	-0.719273	1.3228
NKX6-2	NM_177400	0.0027601	-0.518476	-1.1298	1.5277
TRIM65	NM_173547	0.002761	-0.72936	-1.22678	1.4117
MAB21L2	NM_006439	0.0027755	-0.580333	-0.875401	1.2269
RND2	NM_005440	0.0027794	-0.196899	-0.569922	1.2951
LOC100289641		0.0027813	-0.211736	-0.326101	1.0825
NPL	NM_030769	0.0027818	-0.372766	-0.698486	1.2533
LGALS12	NM_033101	0.0027828	-0.398731	-0.780673	1.3031
C9orf98	NM_152572	0.002785	-0.393951	-0.599102	1.1528
RHBG	NM_020407	0.0027975	-0.302579	-0.574153	1.2071
CNOT6L	NM_144571	0.0028176	0.400073	-0.129328	1.4433
SGTB	NM_019072	0.0028181	-0.596687	-0.914944	1.2468
C7orf25	NM_001099858	0.0028246	-0.0850267	-0.271009	1.1376
BAI2	NM_001703	0.0028249	0.309782	-0.0205033	1.2573
ZNF221	NM_013359	0.0028375	-0.622517	-0.974529	1.2763
TRIML2	NM_173553	0.0028376	-0.611049	-1.60276	1.9885
C17orf68	NM_025099	0.0028412	0.115987	-0.151067	1.2033
NCAPG	NM_022346	0.0028418	-0.555255	-0.919941	1.2876
OR8D2	NM_001002918	0.0028438	-0.523017	-1.31483	1.7313
ZNF823	NM_001080493	0.0028578	-0.370504	-0.552682	1.1346
USP41	XM_036729	0.0028593	-0.165882	-0.427706	1.199
SLC5A8	NM_145913	0.0028598	-0.541993	-1.51391	1.9615
PNPLA5	NM_138814	0.0028842	-0.412659	-0.788609	1.2977
C10orf79	NM_025145	0.0028958	-0.583854	-0.865335	1.2154
GML	NM_002066	0.0028963	-0.297613	-0.495443	1.147
TRAF3IP2-AS1	NR_034108	0.0028977	0.0818371	-0.18821	1.2058
RFC3	NM_002915	0.0029005	-0.353217	-0.664559	1.2409
MFSD8	NM_152778	0.0029012	-0.156616	-0.353727	1.1464
COX4I1	NM_001861	0.0029043	1.75969	0.534365	2.3381
FANCB	NM_001018113	0.0029188	-0.43648	-0.830586	1.3141
LOC341056	NR_027288	0.0029204	-0.257077	-0.570465	1.2426
NCAM1	NM_000615	0.0029228	-0.344299	-0.604158	1.1974
NCRNA00173	NR_027345	0.0029229	-0.889516	-1.17885	1.2221
TRYX3	NM_001001317	0.0029361	-0.832222	-1.22669	1.3145
ASTN2	NM_001184734	0.0029399	0.750947	0.156719	1.5097
LOC100128590	XR_109974	0.002941	-0.877849	-1.12354	1.1857
ZBTB12	NM_181842	0.0029557	-0.487158	-1.11611	1.5464
LOC100128496	XM_001725705	0.0029568	-1.13477	-1.3847	1.1891
LOC728819	NM_001101330	0.0029604	-0.786769	-1.03482	1.1876
EFCAB11		0.0029609	-0.238784	-0.902381	1.584
C4orf17	NM_032149	0.0029633	-0.512091	-1.17252	1.5806
C12orf70	NM_001145010	0.0029812	-0.305806	-0.781631	1.3907
PSMB2	NM_002794	0.0029815	0.494877	-0.477081	1.9615
CTSL2	NM_001333	0.0029845	0.575949	-0.109682	1.6084
LOC285419	NR_027105	0.0029845	-0.345641	-0.717474	1.294
LOC100505773	XR_108295	0.0029988	-0.773381	-1.04413	1.2064
FLJ39051	NR_033839	0.0029993	-0.238634	-0.335307	1.0693
RAP2A	NM_002886	0.0030011	-0.0349364	-0.372941	1.264
AGBL1	NM_152336	0.0030035	-0.435386	-0.930963	1.4099
CCDC102B	NM_001093729	0.0030048	-0.373881	-0.715725	1.2674
DTX3	NM_178502	0.0030361	-0.159758	-0.896022	1.6659
FMNL3	NM_175736	0.0030401	-0.911823	-1.15438	1.1831
IQCF1	NM_152397	0.0030424	-0.980173	-1.20057	1.1651
LOC100499489	NR_036533	0.0030446	-1.0327	-1.37316	1.2662
PPCDC	NM_021823	0.0030551	-0.398309	-0.677147	1.2132
GRIK1	NM_000830	0.0031004	-0.368973	-0.865	1.4103
EIF1	NM_005801	0.0031024	3.17583	1.24718	3.807
CASQ1	NM_001231	0.0031167	-0.561101	-0.969634	1.3273
RNF166	NM_001171815	0.0031203	-0.230197	-0.346182	1.0837
LOC100506012	XM_003118780	0.0031209	-0.0161956	-0.336837	1.2489
INGX	NR_002226	0.0031554	-1.01924	-1.67002	1.57
GABBR2	NM_005458	0.0031624	-0.377636	-0.897679	1.434
GPR75	NM_006794	0.0031648	-0.475052	-0.798039	1.2509
EIF2AK2	NM_001135651	0.0031649	0.12937	-0.243101	1.2946
LOC100507255	XR_108696	0.0031786	-0.236269	-0.382755	1.1069
PPP4R4	NM_020958	0.003198	-0.000313951	-0.528739	1.4424
OR6N1	NM_001005185	0.0031998	-0.402245	-1.1026	1.6249
LOC100510356	XR_115054	0.0032003	-0.745685	-0.949759	1.1519
USP26	NM_031907	0.0032192	-0.577381	-1.45859	1.8419
CENPF	NM_016343	0.0032196	-0.396679	-0.767039	1.2927
TIGIT	NM_173799	0.00326	-0.559844	-0.92695	1.2898
C1QTNF7	NM_001135170	0.003261	-0.33229	-0.69825	1.2887
OR10J5	NM_001004469	0.0032642	-0.892515	-1.15731	1.2015
WDR25	NM_001161476	0.0032842	-0.35014	-0.657186	1.2372
LAPTM4A	NM_014713	0.0032978	3.29932	2.04651	2.3831
LOC100506387	XR_110057	0.0033009	-0.933015	-1.19698	1.2008
TMEM14B	NM_001127711	0.0033012	2.36326	2.05976	1.2341
KIAA1632	NM_020964	0.0033017	-0.885245	-1.14094	1.1939
DDX31	NM_022779	0.0033246	-0.256394	-0.361724	1.0757
KL	NM_004795	0.0033391	-0.125806	-0.469377	1.2689
LAX1	NM_001136190	0.0033557	-0.616795	-0.994591	1.2994
CDK15	NM_139158	0.0033599	-0.584958	-1.5376	1.9354
JMJD8	NM_001005920	0.0033628	0.496501	0.242787	1.1923
CEACAM4	NM_001817	0.0033629	-0.534583	-0.857606	1.2509
ATP1A3	NM_152296	0.0033795	0.833563	0.148526	1.6077
HTATSF1	NM_001163280	0.0033845	3.54164	1.76411	3.4284
LOC100288109		0.0034202	-1.01713	-1.4072	1.3105
LOC374890	XR_109585	0.003424	-0.972889	-1.55737	1.4995
DNAH10	NM_207437	0.0034405	-0.991293	-1.25612	1.2015
COX6B2	NM_144613	0.0034431	-0.204636	-0.55532	1.2752
CASS4	NM_001164114	0.0034434	-0.596233	-0.92248	1.2537
LOXL3	NM_032603	0.0034629	-0.418194	-0.603349	1.1369
ASB5	NM_080874	0.0034635	-0.626056	-0.900977	1.2099
C20orf71	NM_001042439	0.0034954	-0.956168	-1.2504	1.2262
FLJ35424	NR_040045	0.0035042	-0.914573	-1.54231	1.5451
C1orf118	XR_110470	0.0035049	-0.818611	-1.03333	1.1605
C11orf16	NM_020643	0.003505	-0.674765	-1.15093	1.391
CDCA5	NM_080668	0.0035168	-0.538388	-1.11631	1.4927
GLRA3	NM_001042543	0.0035386	-0.251126	-0.628885	1.2993
LOC100510009	NM_030798	0.0035386	-0.954162	-1.22672	1.2079
TMEM30A	NM_001143958	0.0035569	1.18119	0.683312	1.4121
HTR1A	NM_000524	0.0035637	-0.216916	-0.772147	1.4694
HPGDS	NM_014485	0.0035751	-0.416403	-0.79444	1.2996
LOC100130998	XM_003118537	0.0035953	-0.893761	-1.14442	1.1898
HUNK	NM_014586	0.0036364	-0.593392	-1.06636	1.388
FCAMR	NM_001170631	0.0036379	-0.409075	-1.19449	1.7236
LOC100129767		0.003644	-0.780557	-0.969535	1.14
LOC100134259	NR_024452	0.0036444	-0.879944	-1.16301	1.2168
GPR137C	NM_001099652	0.0036585	-0.419027	-0.726173	1.2373
ABLIM3	NM_014945	0.0036756	0.315666	-0.0753555	1.3113
MOBKL2C	NM_145279	0.0036783	-0.503964	-0.707289	1.1513
TRIM40	NM_138700	0.0036815	-0.612046	-1.49674	1.8464
ANKRD20A1	NM_001012419	0.0036825	-0.504189	-0.783908	1.214
GRIA3	NM_000828	0.0036971	-0.388279	-0.831533	1.3597
PIK3R3	NM_001114172	0.003698	-0.486941	-0.84597	1.2826
NDST1	NM_001543	0.0036993	-0.0699065	-0.318419	1.188
CCDC18	NM_206886	0.0037192	-0.616254	-0.951412	1.2615
LOC100506652	XR_108870	0.0037206	-0.894215	-1.18677	1.2248
LOC283392	NR_026836	0.0037246	-0.409564	-0.787686	1.2996
C19orf40	NM_152266	0.0037384	-0.778635	-1.26172	1.3977
MGAT3	NM_001098270	0.0037445	-0.303905	-0.641482	1.2636
USP49	NM_018561	0.0037555	-0.520972	-0.701458	1.1333
CTLA4	NM_001037631	0.0037603	-0.78021	-1.24418	1.3793
LOC100653227	XM_003403646	0.0037763	0.931028	0.716536	1.1603
ARHGEF11	NM_014784	0.0037767	0.0699941	-0.280776	1.2752
DSG4	NM_177986	0.0037998	-0.592414	-1.42037	1.7752
LOC100507540	XR_108989	0.0038037	-0.894822	-1.16727	1.2079
RNASE7	NM_032572	0.0038245	-0.4814	-1.0893	1.524
LOC200830		0.0038354	-0.703179	-0.88104	1.1312
LOC285628		0.0038382	-0.872237	-1.09614	1.1679
TTK	NM_001166691	0.0038408	-0.586509	-0.966661	1.3015
SIX2	NM_016932	0.0038427	-0.13265	-0.559911	1.3447
C2orf49	NM_024093	0.0038557	-0.358297	-0.661752	1.2341
TMX4	NM_021156	0.0038575	-0.286094	-0.790383	1.4184
GALM	NM_138801	0.003859	-0.509465	-0.714865	1.153
OR3A3	NM_012373	0.0038603	-0.704094	-1.14358	1.3561
WWOX	NM_016373	0.0038617	-0.238095	-0.398971	1.118
LOC283728		0.0038627	-0.109989	-0.349968	1.181
TMOD4	NM_013353	0.0038628	-0.682067	-1.15836	1.3912
OR1D2	NM_002548	0.0038759	-0.585762	-1.01064	1.3425
CDK19	NM_015076	0.0039166	-0.0807244	-0.195782	1.083
SUV420H2	NM_032701	0.00392	-0.0886366	-0.543641	1.3708
SIRPD	NM_178460	0.0039245	-0.438362	-1.00601	1.4821
FLJ38717	XR_108650	0.0039357	-0.516395	-0.736794	1.1651
ZNF676	NM_001001411	0.0039406	-0.256729	-0.382988	1.0915
PPBP	NM_002704	0.0039558	-0.307289	-0.744013	1.3535
HAND1	NM_004821	0.0039563	-0.746573	-1.16313	1.3347
DUSP10	NM_007207	0.0039602	-0.0070542	-0.456747	1.3657
CELF5	NM_001172673	0.0039608	-0.576704	-0.880561	1.2344
LOC283585	XR_041535	0.0039635	-0.833035	-1.06873	1.1775
CCDC83	NM_173556	0.0039642	-0.606602	-1.49943	1.8568
EMB	NM_198449	0.0039778	-0.710744	-0.894068	1.1355
ABRA	NM_139166	0.0039814	-0.73721	-1.20022	1.3784
MSTN	NM_005259	0.0039828	-0.467101	-0.835746	1.2911
CST4	NM_001899	0.0040156	-0.564276	-0.944305	1.3014
ERVK13-1	NR_040023	0.0040187	0.879629	0.730613	1.1088
LY86-AS	NR_026970	0.0040214	-0.823136	-1.02814	1.1527
CNOT2	NM_014515	0.0040234	0.249119	-0.324495	1.4882
XRCC4	NM_003401	0.0040248	-0.0460536	-0.312998	1.2033
IGSF21	NM_032880	0.0040356	-0.0265114	-0.848743	1.7681
LOC100286844	NR_027499	0.0040378	-0.768945	-0.987109	1.1633
KIAA0040	NM_001162893	0.004043	-0.411884	-0.706672	1.2267
GRM1	NM_000838	0.0040774	-0.565913	-0.980222	1.3327
ZNF442	NM_030824	0.0040787	-0.413948	-0.592535	1.1318
ACMSD	NM_138326	0.0040789	-0.755554	-1.11074	1.2791
LOC400654	NR_033983	0.0040789	-0.828737	-1.04657	1.163
AJAP1	NM_001042478	0.0040988	-0.478751	-0.946258	1.3827
TAS2R39	NM_176881	0.0041017	-0.592665	-1.55374	1.9468
TRPV5	NM_019841	0.0041189	-0.654889	-1.04311	1.3088
DNTT	NM_001017520	0.0041198	-0.551394	-0.928838	1.299
POPDC2	NM_022135	0.0041199	-0.703612	-1.03417	1.2575
UBE2T	NM_014176	0.0041218	0.454179	-0.27451	1.6571
ANLN	NM_018685	0.0041227	-0.628404	-1.127	1.4128
SOHLH2	NM_017826	0.0041242	-0.616271	-0.972962	1.2805
APLNR	NM_005161	0.0041365	-0.431474	-0.697244	1.2023
GLI1	NM_005269	0.004137	1.56306	-0.249018	3.5115
ANKRD40	NM_052855	0.0041376	-0.510713	-0.817172	1.2367
C20orf54	NM_033409	0.004142	-1.00817	-1.29135	1.2169
DNAH9	NM_001372	0.0041552	-0.222221	-0.452768	1.1733
GALNT13	NM_052917	0.0041783	-0.817268	-1.2296	1.3308
DIRAS2	NM_017594	0.0041988	-0.727047	-1.16339	1.3532
C14orf49	NM_152592	0.0042011	-0.995751	-1.23249	1.1783
KRTAP11-1	NM_175858	0.0042166	-0.340907	-0.72784	1.3076
GHRLOS2	NR_026829	0.004218	-0.811393	-1.12262	1.2408
CRYGC	NM_020989	0.0042188	-0.487311	-0.983723	1.4107
DGCR9	NR_024159	0.0042225	-0.12995	-0.428699	1.2301
LOC100506380	XR_108712	0.0042439	-0.905041	-1.19976	1.2266
BAGE2	NM_170606	0.0042562	-0.802004	-1.04017	1.1795
EHHADH	NM_001166415	0.004277	-0.375623	-0.611644	1.1777
OIP5	NM_007280	0.0042797	-0.511664	-0.8872	1.2973
FAM129C	NM_001098524	0.0042829	-0.95633	-1.26568	1.2392
FLJ32955	XR_108437	0.004283	-0.901463	-1.12114	1.1645
HAS1	NM_001523	0.0042967	-0.667984	-1.1537	1.4003
ZNF287	NM_020653	0.0042968	0.0789741	-0.212914	1.2242
SREBF1	NM_001005291	0.0042982	0.814377	0.339345	1.3899
KRTAP4-2	NM_033062	0.0043002	-0.535091	-0.796347	1.1985
LOC285735	NR_026969	0.0043046	-0.861292	-1.08497	1.1677
GLRA2	NM_001118885	0.0043221	-0.646587	-1.05168	1.3242
TCTN2	NM_001143850	0.0043418	-0.468682	-0.897078	1.3457
LOC100505912	NR_037877	0.0043437	-0.080777	-0.809319	1.657
UCKL1	NM_001193379	0.0043438	0.0277483	-0.447411	1.3901
HDC	NM_002112	0.0043449	-0.238331	-0.695889	1.3732
C3orf30	NM_152539	0.0043568	-0.508735	-1.31907	1.7536
OPALIN	NM_001040103	0.0043574	-0.608652	-1.57172	1.9494
DCD	NM_053283	0.0043794	-0.573153	-1.34699	1.7098
C18orf16	NR_026908	0.0043838	-0.914097	-1.17186	1.1956
BBS12	NM_001178007	0.0043842	1.00829	0.607204	1.3205
DKFZp564H213		0.0044027	-0.92705	-1.17006	1.1835
MS4A14	NM_001079692	0.0044198	-0.666677	-1.02969	1.2861
GIMAP1	NM_130759	0.0044222	-0.52366	-0.966397	1.3592
C3orf62	NM_198562	0.0044414	-0.194608	-0.328832	1.0975
MYLK4	NM_001012418	0.0044418	-0.730438	-0.910403	1.1329
STIM1	NM_003156	0.0044551	0.28075	-0.14683	1.345
LOC100129722	XR_110100	0.0044562	-0.966323	-1.23735	1.2067
ACRBP	NM_032489	0.0044566	-0.546714	-1.00584	1.3747
RIPPLY1	NM_138382	0.0044591	-0.975012	-1.66128	1.6091
SIGLEC5		0.0044601	-0.310076	-0.506127	1.1456
APOA5	NM_052968	0.004462	-0.485653	-0.99972	1.4281
DOK6	NM_152721	0.0044794	0.174792	-0.740597	1.8861
LOC388692	NR_027002	0.0044819	-0.904702	-1.19647	1.2241
RIBC1	NM_001031745	0.0044833	-0.139087	-0.315324	1.1299
FAR2	NM_018099	0.0044841	-0.474068	-0.821315	1.2721
NUBP2	NM_012225	0.0044977	0.344646	-0.120469	1.3804
LOC645485	XM_932931	0.0045013	-0.888658	-1.11973	1.1737
CYB5D2	NM_144611	0.004502	1.17532	0.862931	1.2418
LOC100132686	XR_078450	0.004515	-0.95138	-1.26266	1.2408
NCRNA00247	NR_015359	0.0045164	0.0797143	-0.200971	1.2148
FAM190A	NM_001145065	0.0045229	-0.552518	-0.833865	1.2153
OSBPL6	NM_032523	0.0045393	0.824043	0.354404	1.3848
DHRS9	NM_001142270	0.0045612	-0.563485	-1.02684	1.3787
ZNF90	NM_007138	0.0045775	-0.799758	-1.22773	1.3453
LPPR3	NM_024888	0.0045779	-0.348509	-0.748916	1.3199
SLC12A5	NM_001134771	0.0045965	0.248612	-0.0413207	1.2226
LOC81691	NM_001144924	0.0045978	-0.530001	-0.929771	1.3193
KLHL17	NM_198317	0.0046003	-0.501393	-1.001	1.4138
ZNF626	NM_001076675	0.0046006	0.254877	0.0398737	1.1607
SPATA12	NM_181727	0.0046011	-0.505354	-1.20148	1.6201
SUFU	NM_001178133	0.0046019	-0.655274	-1.10691	1.3676
HYLS1	NM_001134793	0.0046191	0.153829	-0.0686657	1.1667
MMP15	NM_002428	0.0046209	-0.38203	-0.744355	1.2855
SMC1B	NM_148674	0.0046212	-0.528918	-1.42916	1.8664
PDZRN4	NM_001164595	0.0046787	0.20447	-0.267544	1.387
POLR2D	NM_004805	0.0046815	-0.30872	-0.539757	1.1737
LOC284260	XM_001720683	0.0046981	-0.979383	-1.17128	1.1423
LOC284009	NR_028335	0.0047181	-0.897519	-1.14424	1.1865
OR4A15	NM_001005275	0.0047193	-0.44394	-0.851908	1.3268
LOC100271836	NR_002453	0.0047225	-0.338583	-0.564641	1.1696
TMEM25	NM_001144034	0.004723	-0.126298	-0.481253	1.2789
NDUFA10	NM_004544	0.0047368	-0.0735447	-0.425142	1.276
KIF2B	NM_032559	0.0047375	-0.608131	-1.56109	1.9358
BLID	NM_001001786	0.0047581	-0.841457	-1.12275	1.2153
MAS1L	NM_052967	0.004779	-0.484089	-0.99182	1.4218
LOC155060	NM_001195220	0.0047831	-0.908853	-1.1482	1.1805
FAM154A	NM_153707	0.0047845	-0.434835	-0.929825	1.4093
ARHGAP32	NM_001142685	0.004802	0.113421	-0.173914	1.2204
SYT5	NM_003180	0.0048235	0.470682	-0.0685603	1.4532
H3F3A	NM_002107	0.0048401	1.79953	1.70137	1.0704
LOC415056	NR_024369	0.0048433	-0.95349	-1.20404	1.1897
COPS6	NM_006833	0.0048592	1.34591	0.631153	1.6412
LILRB3	NM_001081450	0.004863	-0.272997	-0.442417	1.1246
AGK	NM_018238	0.0048643	0.491976	0.259067	1.1752
IFNE	NM_176891	0.004878	-0.772498	-1.06255	1.2227
DOPEY1	NM_015018	0.0048808	0.320381	0.0100367	1.24
C8orf55	NM_016647	0.0048816	0.0517112	-0.230779	1.2163
GCNT1	NM_001097633	0.0048835	-0.398578	-0.676954	1.2128
HJURP	NM_018410	0.0048973	-0.459043	-1.04523	1.5013
PLEKHA8	NM_001197026	0.0048982	-0.62638	-0.918696	1.2246
CXCR2	NM_001168298	0.0049156	-0.389348	-0.81171	1.3401
LOC100507950	XR_111532	0.004917	-0.973993	-1.23649	1.1996
OR2B2	NM_033057	0.0049222	-0.70111	-1.09736	1.3161
QRICH2	NM_032134	0.0049235	-0.587842	-1.38896	1.7424
LOC100130288		0.004962	-0.787239	-0.979893	1.1429
LOC100653058	XM_003403391	0.0049775	0.401621	0.219792	1.1343
IL1RAPL2	NM_017416	0.0049836	-0.765771	-1.18839	1.3404
C1orf94	NM_032884	0.004998	-0.224243	-1.06271	1.7881
PCDHGA1	NM_018912	0.0050022	-0.71326	-1.26744	1.4683
LOC283861		0.0050037	-0.0697231	-0.23249	1.1194
SEPT7L	NR_027269	0.0050426	-0.671282	-0.833896	1.1193
C10orf112	XM_001716843	0.0050583	-0.382746	-0.767315	1.3055
STOML3	NM_145286	0.0050612	-1.02924	-1.68453	1.5749
PLAC9	NM_001012973	0.0050622	-0.746245	-1.17046	1.3418
FAM54A	NM_001099286	0.005084	-0.812474	-1.06538	1.1916
HSD17B14	NM_016246	0.0051003	0.425218	0.204494	1.1653
OR56B1	NM_001005180	0.0051166	-0.338769	-1.2594	1.8929
CDNF	NM_001029954	0.0051196	-0.595307	-0.790139	1.1446
RHBDD2	NM_001040456	0.0051212	1.71669	1.48422	1.1748
MORN1	NM_024848	0.0051436	-0.663042	-1.12694	1.3793
TDRD10	NM_001098475	0.0051439	0.272838	-0.218416	1.4057
LOC400940	NR_026833	0.0051587	-0.785811	-0.973431	1.1389
ADAM21	NM_003813	0.00516	-0.568156	-0.903839	1.262
IMPG2	NM_016247	0.0051644	-0.497244	-1.14872	1.5708
LHFPL5	NM_182548	0.0051644	-0.324951	-0.899809	1.4895
GDF1	NM_001492	0.0051761	-0.163571	-0.462933	1.2306
GPR112	NM_153834	0.0051848	-0.508284	-1.15304	1.5635
LOC100507274	XR_108494	0.0051969	-0.841611	-1.05944	1.163
RAB3A	NM_002866	0.0051983	0.140416	-0.213857	1.2783
SAR1B	NM_001033503	0.0051995	-0.172255	-0.582232	1.3287
LYPD4		0.0052019	-0.473484	-0.940353	1.3821
WDFY3-AS2		0.0052021	0.360693	0.0867316	1.2091
ELSPBP1	NM_022142	0.0052181	-0.779177	-1.22276	1.36
ITIH5	NM_001001851	0.0052415	0.169011	-0.254601	1.3413
LOC100129447	XM_001719594	0.0052578	-0.628912	-1.1052	1.3912
LOC100128081	NR_034097	0.0052589	-0.935715	-1.18763	1.1908
IGHV1-69		0.0052628	-0.779597	-0.970101	1.1412
PEBP1	NM_002567	0.0052754	2.80495	1.75037	2.0771
WDFY2	NM_052950	0.0052834	-0.11074	-0.307393	1.146
TRIM48	NM_024114	0.0052954	-0.745966	-1.1515	1.3246
GPR115	NM_153838	0.005301	-0.699781	-0.953205	1.192
LOC100506779	NR_038410	0.0053023	-0.263989	-0.62636	1.2855
PODXL2	NM_015720	0.0053156	0.185886	-0.0334606	1.1642
SLCO4C1	NM_180991	0.005325	-0.461848	-0.919576	1.3734
S100Z	NM_130772	0.0053377	-0.490829	-1.05999	1.4837
PHF2P1	NR_002801	0.0053391	-0.841237	-1.05946	1.1633
LOC100128554	NR_015398	0.0053555	-0.877567	-1.10119	1.1677
LOC100131510	XR_109960	0.0053624	-0.514769	-0.758285	1.1839
C11orf30	NM_020193	0.0053637	-0.226473	-0.353733	1.0922
ST7OT1	NR_002330	0.0053956	0.352424	-0.0766999	1.3464
DOLK	NM_014908	0.0053967	0.189533	-0.110601	1.2313
LOC440993	XR_110395	0.0053996	-0.682068	-1.04199	1.2834
ANKRD22	NM_144590	0.0054049	-0.535729	-0.845111	1.2392
LOC729915	XR_132504	0.0054166	-0.46619	-0.682932	1.1621
STX3	NM_001178040	0.0054222	0.247712	-0.0743119	1.2501
SORCS2	NM_020777	0.0054355	-0.551858	-1.01947	1.3828
ROR2	NM_004560	0.0054361	-0.391167	-0.69896	1.2378
ADRA2B	NM_000682	0.0054766	-0.832843	-1.31008	1.3921
OR8G2		0.0054833	-0.590002	-1.40436	1.7585
PGAM5	NM_001170543	0.0055412	-0.644428	-1.00754	1.2862
LOC100286987		0.0055433	-0.907939	-1.13841	1.1732
FAM169B	NM_182562	0.0055585	-1.05172	-1.64656	1.5103
FAM180A	NM_205855	0.0055769	-0.340919	-0.54078	1.1486
RLN3	NM_080864	0.0055804	-0.431364	-0.785769	1.2785
STK32A	NM_001112724	0.005583	-0.46375	-0.83745	1.2957
LOC100233209	NR_026544	0.0055843	-0.844081	-1.05483	1.1573
RIPK3	NM_006871	0.0056599	-0.371037	-0.925717	1.4688
LENG1	NM_024316	0.0056787	-0.101389	-0.379823	1.2129
C21orf130	NR_024100	0.0056963	-0.794912	-0.983991	1.14
SEMA6D	NM_020858	0.0057166	0.0946557	-0.386638	1.396
AANAT	NM_001088	0.0057395	-0.360647	-0.85745	1.4111
ATP6V0CP3	NR_037141	0.0057832	1.49939	1.33864	1.1179
ABCC6	NM_001079528	0.005801	-0.536194	-0.895488	1.2828
DNAJB7	NM_145174	0.0058155	-0.649491	-1.60093	1.9338
NT5DC4	XM_001715677	0.0058227	-0.856798	-1.06968	1.159
AFF3	NM_001025108	0.0058396	-0.961795	-1.22847	1.203
PCDH18	NM_019035	0.0058434	-0.542303	-1.02919	1.4014
NCRNA00158	NR_024027	0.0058578	-0.925156	-1.16762	1.183
RNF125	NM_017831	0.0058761	-0.489902	-0.74444	1.193
LOC100507772	XR_112530	0.0058778	-1.00101	-1.2736	1.208
MUSK	NM_001166280	0.005878	-0.581451	-0.934337	1.2771
C3orf39	NM_032806	0.005884	1.41206	0.986962	1.3427
MFAP3	NM_001135037	0.0058849	-0.448477	-0.631535	1.1353
SYT12	NM_001177880	0.0058963	-0.237282	-0.654369	1.3352
LOC100130924		0.0059027	-0.435863	-0.693564	1.1956
C4orf36	NM_144645	0.0059034	-0.841153	-1.04473	1.1515
C1QL2	NM_182528	0.0059161	-0.384813	-1.42216	2.0525
PANX3	NM_052959	0.0059215	-0.311782	-0.415313	1.0744
LOC100506003	XR_109785	0.0059225	-0.888043	-1.1141	1.1696
PLEKHA5	NM_001143821	0.0059613	-0.233024	-0.616438	1.3044
KCNRG	NM_173605	0.0059632	-0.482872	-0.755917	1.2084
SAMD10	NM_080621	0.0059649	-0.664148	-1.19792	1.4477
C17orf87		0.0059756	-0.614047	-0.975559	1.2848
LOC100652944	XR_132479	0.0059792	-0.625919	-1.51166	1.8477
HEATR8	NM_001039464	0.0059822	1.55574	1.23326	1.2505
TBRG4	NM_004749	0.0060218	-0.404187	-0.735682	1.2583
SH3TC2	NM_024577	0.0060402	-0.611135	-1.02204	1.3295
CD163L1	NM_174941	0.0060411	-0.523403	-0.986202	1.3782
ZMYND17	NM_001024593	0.0060593	-0.362511	-0.85878	1.4106
PSMG4	NM_001128591	0.0060754	-0.8561	-1.06197	1.1534
KRT25	NM_181534	0.0060786	-0.746943	-1.03004	1.2168
ALOX12	NM_000697	0.0060995	-0.66626	-1.08371	1.3356
KERA	NM_007035	0.0061001	-0.664291	-0.999257	1.2613
SLC5A10	NM_152351	0.0061203	-0.569302	-1.29885	1.6581
FLJ35946	NR_033932	0.0061236	-1.13834	-1.3703	1.1744
KCNA10	NM_005549	0.0061418	-0.440445	-0.895974	1.3713
LOC100505501	XR_108910	0.0061425	-0.675536	-0.973331	1.2293
NEIL3	NM_018248	0.0061553	-0.806688	-1.27028	1.379
MLST8	NM_022372	0.0061627	0.358299	0.155039	1.1513
BPIFA3	NM_178466	0.0061766	-0.616539	-1.52255	1.8739
COL14A1	NM_021110	0.006181	-0.414526	-0.702354	1.2208
LOC730961	XM_001131308	0.0061811	-0.972047	-1.2033	1.1739
SLC13A4	NM_012450	0.0061829	-0.47576	-0.913176	1.3542
TTC33	NM_012382	0.0061847	-0.362907	-0.700893	1.264
NPY6R	NR_002713	0.0061977	-0.462244	-0.837561	1.2971
TMEM64	NM_001008495	0.0061984	-0.153761	-0.609713	1.3717
C12orf36	NR_036555	0.0062169	-0.806894	-1.11614	1.2391
TNFSF11	NM_003701	0.0062206	-0.479361	-0.846194	1.2895
TUBE1	NM_016262	0.0062213	-0.365653	-0.834522	1.384
PIP5K1A	NM_001135636	0.0062233	-0.263923	-0.550123	1.2194
MORC1	NM_014429	0.0062415	-0.485821	-0.684494	1.1476
C9orf71	NM_153237	0.0062575	-1.00886	-1.26506	1.1943
ADAMTS16	NM_139056	0.0062614	-0.561129	-1.33223	1.7066
EFHB	NM_144715	0.006283	-0.391565	-0.737225	1.2707
LOC100128775		0.0063408	1.97764	1.91203	1.0465
NOXRED1	NM_001113475	0.0063639	-1.15919	-1.45506	1.2276
GAL3ST1	NM_004861	0.0063781	-0.221939	-0.615983	1.3141
LOC286254		0.0063985	-0.658087	-0.826062	1.1235
TAC4	NM_001077503	0.0063997	-0.490731	-0.879033	1.3089
SLC19A3	NM_025243	0.0064158	-0.791254	-1.21305	1.3396
COX7B	NM_001866	0.0064189	1.6218	0.941004	1.603
MMP26	NM_021801	0.0064216	-0.851935	-1.32264	1.3858
EPHA7	NM_004440	0.0064371	-0.161327	-0.602248	1.3575
MEAF6	NM_022756	0.0064379	1.35484	0.643624	1.6372
LOC283177	NR_033852	0.0064605	-0.98275	-1.28153	1.2301
GRHL3	NM_198173	0.0064762	-0.573492	-0.773659	1.1488
LOC100289294		0.0064805	-0.77991	-1.04332	1.2003
LOC100133321		0.006498	-0.621032	-0.899108	1.2126
POLE	NM_006231	0.0064987	-0.514918	-0.808984	1.2261
RAET1E	NM_139165	0.0065011	-0.588992	-1.4332	1.7953
NALCN	NM_052867	0.0065199	-0.438054	-0.793018	1.279
C8orf47	NM_001170806	0.006536	-0.0875704	-0.542104	1.3703
HIST1H4G	NM_003547	0.0065362	-0.837134	-1.30486	1.3829
LOC285045	NR_027098	0.0065381	-0.86724	-1.07585	1.1556
LOC100505946	XR_109798	0.0065385	-0.671829	-0.97001	1.2296
TNFRSF11B	NM_002546	0.0065581	-0.377721	-0.778676	1.3204
UPB1	NM_016327	0.0065649	-0.658496	-1.08629	1.3452
LOC100507291	XR_108495	0.0065774	-0.224966	-0.366575	1.1031
C10orf62	NM_001009997	0.0066008	-0.848049	-1.27989	1.349
C5orf34	NM_198566	0.0066043	-0.560764	-0.882165	1.2495
FGD2	NM_173558	0.0066168	-0.565876	-0.915379	1.2741
CBX3P2	NR_033754	0.0066174	-0.585068	-1.04883	1.3791
LOC100505666	XR_108354	0.0066202	-1.00608	-1.28315	1.2117
SPACA4	NM_133498	0.0066205	-0.562638	-1.30425	1.672
MYO18A	NM_078471	0.0066356	0.704361	0.599806	1.0752
MOSC2	NM_017898	0.006641	0.629937	0.144878	1.3996
MMP16	NM_005941	0.0066561	0.00534121	-0.393495	1.3184
ANO2	NM_020373	0.0066613	-0.575996	-0.963249	1.3079
GPR97	NM_170776	0.0066759	-0.35748	-0.723482	1.2888
ADORA3	NM_000677	0.006679	-0.513659	-0.862522	1.2736
CAMKV	NM_024046	0.0066803	-0.0584352	-0.463267	1.3239
LOC642924	NR_033858	0.0067003	-0.826841	-1.03269	1.1534
LOC100510697	XM_003118465	0.0067162	-0.575311	-0.74164	1.1222
GJA3	NM_021954	0.0067206	-0.693015	-1.03485	1.2674
KANSL3	NM_017991	0.0067238	0.36445	0.204904	1.1169
C2orf65	NM_138804	0.0067402	-0.838242	-1.09972	1.1987
KIF20B	NM_016195	0.006743	-0.309937	-0.538217	1.1714
CXorf69	NM_001163438	0.0067555	0.663991	0.443347	1.1653
CABP4	NM_145200	0.0067764	-0.434964	-0.68776	1.1915
CSAG2	NM_001080848	0.006779	-0.462181	-0.972933	1.4248
B4GALNT1	NM_001478	0.0068007	-0.444215	-0.850732	1.3255
CARD11	NM_032415	0.0068356	-0.377891	-0.758368	1.3018
FLJ32063		0.0068383	-0.930122	-1.4032	1.3881
NDST4	NM_022569	0.0068608	-0.608451	-0.916711	1.2382
MBD2	NM_003927	0.0068803	-0.424312	-0.939809	1.4295
FARP2	NM_014808	0.0069043	-0.0955021	-0.231615	1.0989
TMEM37	NM_183240	0.0069204	-0.44868	-0.96586	1.4312
TSSK1B	NM_032028	0.0069357	-0.521672	-1.14799	1.5436
PODN	NM_153703	0.0069573	-0.869076	-1.20429	1.2616
C17orf97	NM_001013672	0.0069591	0.652742	0.440086	1.1588
GCET2	NM_001190259	0.0069636	-1.03198	-1.64245	1.5268
KIF12	NM_138424	0.0069848	-0.544267	-1.28703	1.6734
RPE65	NM_000329	0.0069981	-0.485525	-0.88955	1.3232
DOCK8	NM_001190458	0.006999	-0.00150988	-0.352164	1.2751
GPR101	NM_054021	0.0070166	-0.586081	-1.4295	1.7943
UNC13D	NM_199242	0.0070425	-0.383372	-1.04439	1.5812
IRX5	NM_005853	0.0070822	-0.420033	-0.905738	1.4003
FLJ10357	NM_018071	0.0070827	-0.962701	-1.23123	1.2046
MICALCL	NM_032867	0.0070839	-0.55776	-1.27091	1.6394
LOC91149	NR_026995	0.0070844	-0.894633	-1.13383	1.1803
CBLC	NM_012116	0.0070963	-0.540807	-1.26778	1.6552
ZNRD1-AS	NR_026751	0.0070976	-0.820872	-1.01056	1.1405
LOC100506037	XR_108445	0.0071191	-0.94229	-1.18889	1.1864
GGH	NM_003878	0.0071195	-0.0733098	-0.301097	1.171
ZNF845	NM_138374	0.0071367	0.271096	0.185174	1.0614
RUNDC2C	NR_002939	0.0071563	-0.270172	-0.582228	1.2415
ZNF547	NM_173631	0.0071604	-0.539949	-0.905257	1.2882
LOC100329135	NM_001195576	0.0071608	-0.903902	-1.51713	1.5297
CLN6	NM_017882	0.0072004	-0.304472	-0.85405	1.4637
C1orf187	NM_198545	0.0072018	-0.878448	-1.20856	1.2571
FAHD2A	NM_016044	0.0072223	-0.302495	-0.406914	1.0751
LOC100288238	XM_002342906	0.0072239	-0.775672	-0.955881	1.133
SCD	NM_005063	0.0072411	0.390438	-0.0587135	1.3652
FLJ35220	NM_001164637	0.0072619	-1.06375	-1.36867	1.2354
REM1	NM_014012	0.0072803	-0.52742	-0.884136	1.2805
PDZK1P1	NR_003377	0.0072826	-0.693963	-0.873146	1.1322
MLLT3	NM_004529	0.0072848	0.288253	0.0191553	1.2051
FBXO36	NM_174899	0.0073015	-0.719383	-0.964184	1.1849
DSCC1	NM_024094	0.007321	-0.44618	-0.680777	1.1766
NLRP4	NM_134444	0.0073373	-0.595452	-1.39043	1.735
LOC100507637		0.0073388	-0.697365	-0.917907	1.1652
PCDHA6	NM_018909	0.0073582	-0.569745	-0.970139	1.3199
FLJ31104	XR_108600	0.0073602	-0.89662	-1.13021	1.1758
MAB21L3	NM_152367	0.0073615	-0.550984	-1.1677	1.5334
ST8SIA1	NM_003034	0.0073632	-0.28948	-0.734581	1.3614
LOC100507190	XR_110870	0.0073773	-0.99202	-1.57064	1.4934
NLRP11	NM_145007	0.0073799	-0.634682	-1.52367	1.8519
TBCD	NM_005993	0.0073959	-0.422294	-0.840071	1.3359
GPR128	NM_032787	0.0074157	-0.556725	-1.37133	1.7588
MRPL51	NM_016497	0.0074231	2.01327	1.75636	1.1949
LOC221814		0.0074635	-1.11119	-1.36096	1.189
LOC440117	NR_033970	0.0074839	-0.920905	-1.14403	1.1673
CYSLTR1	NM_006639	0.007498	-0.82143	-1.2751	1.3695
LCN15	NM_203347	0.0075213	-0.410602	-0.747487	1.263
ADAMTS20	NM_025003	0.0075242	-0.755159	-1.16442	1.328
TREML4	NM_198153	0.0075247	-1.14431	-1.38234	1.1794
RBL1	NM_002895	0.0075413	-0.455748	-0.640488	1.1366
ALAD	NM_000031	0.0075587	-0.258498	-0.547158	1.2215
FUT10	NM_032664	0.0075599	-0.573848	-0.851299	1.2121
SIGLEC9	NM_014441	0.0075621	-0.393795	-0.687398	1.2257
KRTAP13-2	NM_181621	0.0075751	-0.486918	-0.916822	1.3471
LOC407835	NR_002144	0.0075762	0.421247	0.215352	1.1534
CEP152	NM_001194998	0.0075814	-0.228982	-0.539949	1.2405
LOC286002	NR_028137	0.0075954	-0.911567	-1.18821	1.2114
ADCY1	NM_021116	0.007603	0.0730397	-0.460121	1.4471
CNTNAP5	NM_130773	0.0076152	-1.02562	-1.61482	1.5044
SIGLEC1	NM_023068	0.0076213	-0.708067	-1.08799	1.3013
ZNF408	NM_024741	0.0076216	-0.346251	-0.703412	1.2809
CYTB		0.0076235	2.88523	2.82619	1.0418
GAMT	NM_000156	0.0076391	0.565212	0.1505	1.333
RGS7BP	NM_001029875	0.0076408	-0.358984	-0.583621	1.1685
FLJ37786	XR_108343	0.0076425	-0.824164	-1.01413	1.1407
C20orf117	NM_080627	0.0076442	0.0966032	-0.130376	1.1704
TTBK2	NM_173500	0.0076629	-0.299395	-0.520136	1.1653
LOC121952	NR_026965	0.0076766	-0.864566	-1.08336	1.1638
TMEM86A	NM_153347	0.0076802	-0.453906	-0.6771	1.1673
STK32B	NM_018401	0.0077562	-0.697752	-1.10742	1.3284
PSD	NM_002779	0.0077571	-0.0686559	-0.460819	1.3124
LYPD2	NM_205545	0.0077761	-0.570774	-1.43185	1.8164
LOC100129463	XR_108760	0.0078198	-0.576151	-0.793343	1.1625
HRASLS2	NM_017878	0.0078571	-0.619192	-0.928707	1.2393
LOC100288701		0.0078602	-0.858238	-1.06746	1.1561
TMEM59	NM_004872	0.0078821	1.32604	0.12557	2.2981
LOC100287807	XR_113373	0.0079	-0.909137	-1.12854	1.1643
RNGTT	NM_003800	0.0079019	-0.0147946	-0.574116	1.4736
LOC643085	XR_109914	0.0079203	-0.652112	-0.831953	1.1328
C8orf8		0.0079379	-1.00638	-1.58936	1.4979
MLNR	NM_001507	0.0079588	-0.431259	-0.890885	1.3752
LOC100506070	XR_110163	0.0079614	-0.883338	-1.16169	1.2128
PCDHB3	NM_018937	0.0079834	-0.346151	-0.550753	1.1524
GRM8	NM_000845	0.0079981	-0.416976	-0.712356	1.2272
LINGO4	NM_001004432	0.0080002	-0.34118	-0.49871	1.1154
DPPA3	NM_199286	0.0080163	-1.07405	-1.67792	1.5198
SLC30A10	NM_018713	0.0080237	-0.576647	-0.891275	1.2437
E2F7	NM_203394	0.0080248	-0.719723	-1.11024	1.3109
PIF1	NM_025049	0.0080371	-0.669664	-1.06143	1.312
ALS2CR12	NM_139163	0.008039	-0.574504	-1.26361	1.6123
XIRP1	NM_194293	0.0080397	-0.515273	-1.10653	1.5066
LOC285500	XM_496726	0.0080427	-0.958052	-1.19402	1.1777
LOC158572	NR_026742	0.0080636	-0.0967756	-0.263102	1.1222
OR2S2	NM_019897	0.0080786	-0.840784	-1.30439	1.379
DLGAP1	NM_001003809	0.0080802	-0.403781	-0.688152	1.2179
GATA3	NM_001002295	0.008095	1.45608	0.532445	1.8969
LOC100507250	XR_110376	0.0081021	-0.712344	-0.89876	1.1379
LOC100505478	NM_001199233	0.0081041	-1.0212	-1.64545	1.5414
CDH10	NM_001190450	0.0081179	0.536731	0.1883	1.2732
CDX4	NM_005193	0.0081606	-0.559411	-1.26571	1.6316
MGC16384		0.0081636	-0.984825	-1.2456	1.1981
LOC285281		0.0081781	-0.914483	-1.13747	1.1671
ADAMTS14	NM_080722	0.0081819	-1.13896	-1.389	1.1892
SLC47A2	NM_152908	0.0081843	-0.608315	-1.44109	1.7811
LOC283045		0.0081983	-0.865407	-1.08664	1.1657
LAMB2P1	NR_004405	0.0082177	-0.806664	-1.15528	1.2733
PROM2	NM_001165977	0.0082206	-0.702588	-1.06986	1.2899
ZNF826P	NR_036455	0.0082409	-0.599147	-0.847661	1.188
CCDC129	NM_194300	0.0082568	-0.878938	-1.0819	1.1511
FBXL20	NM_001184906	0.0082589	-0.29562	-0.65368	1.2817
RBP5	NM_031491	0.0082617	-0.25426	-0.380747	1.0916
CST9L	NM_080610	0.008284	-0.60355	-1.41319	1.7528
ADAMTS4		0.0082846	-0.608273	-1.45332	1.7963
CBLN4	NM_080617	0.008299	-0.561292	-1.28799	1.6548
LOC729839		0.0083043	-0.752243	-0.941956	1.1405
CEACAM21	NM_033543	0.0083196	-0.560255	-1.29351	1.6624
GTPBP2	NM_019096	0.0083249	-0.507338	-0.904948	1.3173
ANKRD30BL	NR_026916	0.0083361	-0.959585	-1.20582	1.1861
LOC284998	NR_038231	0.0083825	-0.965753	-1.48512	1.4333
LRRTM1	NM_178839	0.0083989	-0.576833	-1.05589	1.3938
CRABP1	NM_004378	0.0084004	-0.042696	-0.506614	1.3793
KRTAP7-1	NM_181606	0.0084156	-1.10019	-1.31206	1.1582
LOC100505881	XR_108840	0.0084165	-0.550986	-0.832034	1.2151
SLC9A2	NM_003048	0.0084166	-0.863575	-1.22337	1.2832
LYPD6	NM_001195685	0.0084182	-0.532728	-1.08726	1.4687
IL20RB	NM_144717	0.0084369	-0.717365	-1.0937	1.298
TSPAN15	NM_012339	0.0084373	-0.320607	-0.447	1.0916
FGD4	NM_139241	0.0084417	-0.365293	-0.826343	1.3765
WDR49	NM_178824	0.0084592	-0.496858	-1.14656	1.5688
ZNF557	NM_001044387	0.008461	-0.58376	-0.948096	1.2873
NETO1	NM_138966	0.0084647	-0.665903	-1.21026	1.4584
ALS2CR8	NM_001104586	0.0084763	-0.0321903	-0.175772	1.1046
TTTY5	NR_001541	0.0084792	-1.18768	-1.41798	1.1731
SRSF3	NM_003017	0.0085001	0.981245	0.196534	1.7227
CPA6	NM_020361	0.0085035	-0.643324	-1.52455	1.8419
OR51E1	NM_152430	0.0085047	-0.64255	-1.03611	1.3136
PLK4	NM_001190799	0.0085175	-0.672999	-1.0243	1.2757
C11orf1	NM_022761	0.0085188	-0.639613	-1.00004	1.2838
INCENP	NM_001040694	0.0085379	-0.681344	-1.12316	1.3583
POC1A	NM_015426	0.0085628	-0.203021	-0.292388	1.0639
MTL5	NM_001039656	0.008581	-0.619987	-1.00608	1.3069
ATP2A2	NM_001135765	0.0085972	0.0400822	-0.425279	1.3807
TTLL11	NM_001139442	0.0085988	-0.623914	-1.06812	1.3606
LINC00307	NR_038855	0.0085996	-1.05071	-1.32916	1.2129
ZNF174	NM_001032292	0.0086011	-0.479753	-0.771751	1.2243
RPS6KL1	NM_031464	0.0086241	-0.298029	-0.735533	1.3543
LOC100130691	NR_026966	0.0086351	-0.0683674	-0.396643	1.2555
OR4X2	NM_001004727	0.0086423	-0.555583	-0.776707	1.1656
MED22	NM_133640	0.0086439	-0.122025	-0.357221	1.1771
CA10	NM_001082533	0.0086561	0.350758	-0.143671	1.4088
CKMT1A	NM_001015001	0.0086607	0.971132	0.563188	1.3268
C20orf197	NM_173644	0.0086634	-0.778387	-1.02345	1.1851
GPR6	NM_005284	0.0086648	0.238936	-0.0993919	1.2643
WDR78	NM_024763	0.0086784	0.0528766	-0.248016	1.2319
TMSB15A	NM_021992	0.0086961	-0.338094	-0.644728	1.2368
CLSTN2	NM_022131	0.0086987	-0.410978	-0.834972	1.3416
LOC440704	NR_033922	0.0087007	-0.915622	-1.12978	1.16
COX5A	NM_004255	0.0087034	0.497388	-0.314891	1.756
C2orf50		0.0087215	-0.494302	-1.10954	1.5318
SYNGAP1	NM_006772	0.0087218	-0.113212	-0.397464	1.2178
HLA-C	NM_002117	0.0087352	3.9504	2.35824	3.015
BEX2	NM_001168399	0.0087404	3.11062	2.4224	1.6113
TMEM40	NM_018306	0.0087422	-0.594022	-1.00919	1.3335
ZNF467	NM_207336	0.0087585	-0.134006	-0.421191	1.2203
COL23A1	NM_173465	0.0087586	-0.736451	-1.18593	1.3656
FLJ41350	NR_029380	0.0087756	-1.08739	-1.67301	1.5007
SGK196	NM_032237	0.0087796	-0.348284	-0.509829	1.1185
C5orf33	NM_001085411	0.0088006	-0.391062	-0.502031	1.08
CENPQ	NM_018132	0.0088761	-0.182471	-0.371142	1.1397
TINAG	NM_014464	0.0088782	-0.517775	-1.05516	1.4513
C14orf105	NM_018168	0.0089	-0.790873	-1.21278	1.3397
C9orf174	NM_020893	0.0089022	0.797694	0.316819	1.3956
DNAJC5G	NM_173650	0.0089045	-0.496607	-1.02026	1.4376
SLC8A3	NM_001130417	0.0089179	-0.186868	-0.706641	1.4337
CDHR2	NM_001171976	0.0089237	-0.657866	-1.04047	1.3037
LRRC25	NM_145256	0.0089364	-0.22251	-0.678201	1.3714
LOC728690	XM_001715625	0.0089634	-0.854539	-0.995421	1.1026
ASAP1	NM_018482	0.0089642	-0.404465	-0.866657	1.3776
LOC100129572		0.0089822	-0.959263	-1.65201	1.6164
LOC647323	NR_033944	0.0089952	-1.04439	-1.62877	1.4994
HOXB8	NM_024016	0.0089987	-0.828455	-1.26621	1.3545
EEF2	NM_001961	0.0090174	3.15572	1.91332	2.3659
TRERF1	NM_033502	0.0090355	0.62567	0.238509	1.3078
LOC643711		0.0090405	-0.888297	-1.09653	1.1553
WDR61	NM_025234	0.0090426	0.829411	0.161613	1.5886
KRTAP13-1	NM_181599	0.0090558	-0.619117	-1.48753	1.8257
CSPG4P1Y	NR_001554	0.0090638	-0.70821	-1.09609	1.3085
LOC732275	NR_024406	0.0090758	-1.0464	-1.60349	1.4713
SPDYE5	NM_001099435	0.0090774	0.0528086	-0.127164	1.1329
CHRNA5	NM_000745	0.0090814	-0.49209	-0.958729	1.3819
LOC150005		0.0090971	-0.82282	-1.0125	1.1405
HLA-A	NM_002116	0.0091163	3.81933	1.84018	3.9426
PRPF40B	NM_001031698	0.0091247	0.528984	0.316713	1.1585
JTB	NM_006694	0.0091952	2.69114	1.77076	1.8926
PRDM7	NM_052996	0.0091975	-0.586381	-1.49128	1.8724
LINC00087	NR_024493	0.0091979	1.92142	1.33832	1.4981
CN5H6.4	NR_024009	0.0092166	-0.743133	-0.912508	1.1246
ADAM30	NM_021794	0.0092192	-0.453422	-1.18219	1.6572
LOC728099	XR_015256	0.0092212	-1.0037	-1.25548	1.1907
ZNF620	NM_175888	0.0092215	-0.406928	-0.693634	1.2199
LOC100509621	XR_112469	0.0092239	-0.891636	-1.11296	1.1658
SERPINA10	NM_016186	0.0092362	-0.550187	-1.28554	1.6648
C10orf99	NM_207373	0.009258	-1.00432	-1.25655	1.191
DCHS2	NM_017639	0.00926	-0.37687	-0.603003	1.1697
GRTP1	NM_024719	0.0092774	-0.625375	-0.840308	1.1606
HEATR1	NM_018072	0.0092788	-0.669051	-1.05888	1.3102
CILP2	NM_153221	0.009284	-0.347808	-0.475686	1.0927
LOC283270		0.0093011	-0.201287	-0.330476	1.0937
OR6M1	NM_001005325	0.0093015	-0.300326	-0.547152	1.1866
KATNB1	NM_005886	0.009339	-0.183866	-0.415704	1.1743
MAPK15	NM_139021	0.0093567	-0.411131	-0.928603	1.4314
LOC100128175		0.0093755	-0.699931	-1.22827	1.4423
[truncated: 44 more rows]

## Sheet: Down-regulated genes
GENE_symbol	GENE_NM	P-value	Pituitary_average_value	control_average_value	Fold change
RDH10	NM_172037	0	-0.126425	1.11836	-2.3698
FZD7	NM_003507	0	-0.155745	1.24993	-2.6494
S100A16	NM_080388	2.9976e-15	-0.0567506	0.811017	-1.8248
CGNL1	NM_032866	2.39808e-14	-0.216242	0.860356	-2.1091
KIAA1661		4.95159e-14	-0.388685	0.534278	-1.896
PGM2	NM_018290	7.29417e-14	-0.0713932	0.579219	-1.5698
PI4K2B	NM_018323	9.63674e-14	-0.206498	0.37725	-1.4987
TMTC4	NM_001079669	1.20459e-13	-0.14688	0.39007	-1.4509
PLCXD3	NM_001005473	3.00648e-13	-0.72268	1.01052	-3.3246
PKIB	NM_032471	1.00087e-12	-0.531887	0.673018	-2.3052
RARRES2	NM_002889	1.22435e-12	-0.150987	0.810235	-1.947
COL6A6	NM_001102608	1.62448e-12	-1.08986	1.0538	-4.4188
ARHGAP36	NM_144967	1.62448e-12	-0.108175	2.51513	-6.1616
SYT13	NM_020826	1.64879e-12	0.114018	1.69985	-3.0018
C9orf150	NM_203403	1.66589e-12	-0.764252	0.276272	-2.057
VEPH1	NM_001167911	1.74183e-12	-0.0986011	1.05916	-2.2311
LOC100292909	XM_002345507	1.81977e-12	-0.825606	1.12075	-3.854
ACSS3	NM_024560	1.9269e-12	-0.470988	0.586576	-2.0814
IGFBP6	NM_002178	2.01861e-12	-0.0882445	1.20437	-2.4497
DNAJB11	NM_016306	2.04792e-12	0.632769	1.29648	-1.5842
BBOX1	NM_003986	2.46991e-12	-0.676335	0.852503	-2.8855
ERRFI1	NM_018948	2.65987e-12	0.378085	1.82281	-2.7221
TMEM45A	NM_018004	3.17779e-12	-0.0978542	1.34239	-2.7137
LOC100302650	NR_028308	3.20199e-12	-0.810325	0.733217	-2.9151
ZNF521	NM_015461	3.63254e-12	-0.286971	0.738251	-2.0353
PPARGC1A	NM_013261	4.07285e-12	-0.57879	0.480317	-2.0836
PCDHB7	NM_018940	4.10316e-12	-0.172334	0.538636	-1.6369
TDRD9	NM_153046	5.43587e-12	-0.258257	1.36025	-3.0706
TMEM33	NM_018126	6.73483e-12	-0.14726	0.236159	-1.3044
ZNF503	NM_032772	8.92464e-12	0.0887868	0.881612	-1.7325
ADSSL1	NM_152328	1.2346e-11	0.144909	0.861313	-1.6431
ITGBL1	NM_004791	1.2777e-11	-0.246435	0.608067	-1.8081
ESPNL	NM_194312	2.1441e-11	-0.196829	1.10938	-2.4729
BAG3	NM_004281	2.5855e-11	0.300857	1.36766	-2.0948
GLIS3	NM_001042413	3.27161e-11	-0.820964	0.0351358	-1.8101
BHLHE22	NM_152414	4.5922e-11	-0.859742	0.298931	-2.2325
PON3	NM_000940	5.7319e-11	-0.131578	1.80942	-3.8397
CYP4B1	NM_000779	7.36859e-11	-0.438304	0.448812	-1.8495
TMEM150C	NM_001080506	8.0609e-11	-0.141678	0.542172	-1.6064
MIR21	NR_029493	8.0991e-11	0.22046	1.53871	-2.4936
FRMD4A	NM_018027	9.3961e-11	-0.17555	0.269783	-1.3616
GLT8D2	NM_031302	9.4847e-11	-0.0252891	0.943183	-1.9568
FAM162B	NM_001085480	9.519e-11	-0.18536	0.675803	-1.8165
PCDHGA4	NM_018917	1e-10	0.319189	1.37265	-2.0755
CSGALNACT1	NM_001130518	1.1505e-10	0.00564975	0.915216	-1.8785
TFEB	NM_001167827	1.2319e-10	-0.175159	0.670234	-1.7968
CXCR4	NM_001008540	1.2592e-10	0.150693	1.47938	-2.5117
SLIT1	NM_003061	1.2715e-10	-0.594756	0.553111	-2.2159
RAB24	NM_001031677	1.2779e-10	0.686827	1.39115	-1.6294
AHNAK	NM_001620	1.4307e-10	-0.0819601	0.691431	-1.7093
MYO15A	NM_016239	1.4906e-10	-0.0978592	0.967345	-2.0925
SALL1	NM_001127892	1.5671e-10	-0.450797	0.493569	-1.9243
CHRDL1	NM_001143981	1.5711e-10	-0.412968	0.497811	-1.8801
GOLT1A	NM_198447	2.286e-10	0.135617	0.914434	-1.7157
HYMAI	NR_002768	2.5622e-10	-0.435174	0.927191	-2.5711
GADD45G	NM_006705	2.9875e-10	-0.503902	0.710309	-2.3201
NOTCH2	NM_024408	2.9981e-10	-0.0792398	0.630846	-1.6359
PELI1	NM_020651	3.0695e-10	-0.206543	0.522395	-1.6574
ARRDC4	NM_183376	3.2165e-10	0.194278	0.835531	-1.5597
SOX2	NM_003106	3.4608e-10	-0.266186	0.76901	-2.0494
ZCCHC9	NM_001131035	3.5085e-10	0.365438	0.874543	-1.4232
HSD11B1	NM_005525	3.608e-10	-0.577228	0.451677	-2.0405
SPRY4	NM_001127496	3.6643e-10	-0.0805541	0.842783	-1.8965
KCNJ6	NM_002240	4.8632e-10	-0.495107	0.568967	-2.0908
MAL2	NM_052886	6.5382e-10	0.929032	1.89256	-1.9501
CD79B	NM_000626	6.8772e-10	-0.737743	0.503744	-2.3644
SNHG5	NR_002743	7.3247e-10	-0.187202	0.23963	-1.3443
CELP	NR_001275	9.2543e-10	-0.93128	1.05273	-3.9559
SORBS1	NM_001034954	9.3656e-10	-0.121545	0.335392	-1.3726
LOC150622	NR_026832	1.0629e-09	-0.787328	0.434207	-2.3319
RELL1	NM_001085399	1.1052e-09	0.210637	0.885039	-1.5959
LOC100134361	XR_109723	1.1085e-09	-0.464949	0.289649	-1.6872
SPINK7	NM_032566	1.2102e-09	0.0322916	1.00075	-1.9568
AEBP1	NM_001129	1.2942e-09	-0.313761	0.560283	-1.8328
SNORD104	NR_004380	1.4892e-09	0.196096	1.08689	-1.8542
HES1	NM_005524	1.491e-09	-0.814084	0.175313	-1.9854
OTOS	NM_148961	1.4974e-09	-0.192721	1.26663	-2.7498
TES	NM_015641	1.6583e-09	-0.0888107	0.661989	-1.6827
EAF2	NM_018456	1.6948e-09	-0.0392805	0.540859	-1.495
SOX9	NM_000346	1.7564e-09	-0.45782	0.404238	-1.8176
IL17RB	NM_018725	1.7745e-09	-0.874242	0.163615	-2.0532
LOC399491	XR_111644	1.818e-09	-0.105997	0.880958	-1.982
NR4A2	NM_006186	1.9135e-09	-0.483081	1.12411	-3.0466
PCK1	NM_002591	2.3529e-09	-0.564112	1.25589	-3.5308
C4orf31	NM_024574	2.3596e-09	-0.747287	0.758252	-2.8393
IGFBP5	NM_000599	2.4368e-09	0.538035	2.83777	-4.9237
PRKCZ	NM_001033581	2.5188e-09	-0.0644772	0.595138	-1.5797
SLC34A3	NM_080877	2.8243e-09	0.00534287	0.960677	-1.939
FBXO16	NM_172366	2.8298e-09	0.408178	1.00843	-1.516
MNS1	NM_018365	2.8369e-09	-0.093814	0.349629	-1.3598
GHSR	NM_004122	2.8548e-09	-0.364449	0.594743	-1.9442
VARS2	NM_001167733	3.1066e-09	0.325306	0.906144	-1.4957
LOC728061	XR_040680	3.1236e-09	-0.309335	0.602245	-1.8811
RNF145	NM_144726	3.1657e-09	0.391044	1.0991	-1.6336
RANBP2	NM_001024457	3.1912e-09	0.24224	1.11788	-1.8348
ZNF697	NM_001080470	3.7027e-09	-0.473491	0.548752	-2.0311
HEPACAM2	NM_001039372	3.7677e-09	-0.607801	0.548413	-2.2287
GPM6B	NM_001001994	4.2508e-09	-0.14852	0.836128	-1.9788
DDI2	NM_032341	4.4383e-09	-0.198768	0.134028	-1.2595
EYA4	NM_004100	4.5219e-09	-0.332603	0.853236	-2.275
PRDM11	NM_020229	4.5792e-09	-0.304271	0.121558	-1.3433
COL4A6	NM_001847	4.6289e-09	-0.445641	0.539317	-1.9793
CCDC88B	NM_032251	5.0998e-09	0.0136193	0.954521	-1.9197
VWA3A	NM_173615	5.6176e-09	-0.600358	0.0791957	-1.6016
HP	NM_001126102	5.6775e-09	-0.545226	1.34652	-3.7108
SFRP2	NM_003013	5.9841e-09	-0.624218	0.891525	-2.8595
PCSK6	NM_002570	6.2585e-09	-0.744882	0.220293	-1.9523
ITPR3	NM_002224	6.514e-09	-0.562121	0.288678	-1.8035
C1QTNF4	NM_031909	8.4393e-09	-0.0591475	0.677275	-1.666
CLDN3	NM_001306	9.3692e-09	0.0165506	0.670365	-1.5733
AGR3	NM_176813	9.7734e-09	-0.20436	1.28569	-2.809
KIF27	NM_017576	1.032e-08	0.095678	1.17799	-2.1174
ALK	NM_004304	1.2736e-08	-0.483405	0.180673	-1.5846
RBPMS	NM_001008710	1.2761e-08	-0.382917	0.230886	-1.5303
NOP58	NM_015934	1.2825e-08	0.930938	1.87485	-1.9237
ANKRD37	NM_181726	1.2938e-08	0.238225	1.00091	-1.6966
TTC39C	NM_001135993	1.3222e-08	-0.451876	0.651072	-2.1479
SFMBT2	NM_001018039	1.3908e-08	-0.311988	0.380781	-1.6164
LEPREL4	NM_006455	1.4144e-08	-0.0528218	0.34585	-1.3183
CNR1	NM_001160226	1.4203e-08	-0.518311	0.86441	-2.6076
DFNA5	NM_001127453	1.4445e-08	-0.349455	0.709607	-2.0836
C9orf62	XR_109856	1.5567e-08	0.276294	1.84584	-2.9681
LOC100507226	XR_110249	1.6706e-08	-0.759319	0.179261	-1.9166
B3GALNT2	NM_152490	1.6877e-08	0.420176	1.06683	-1.5655
HSPA2	NM_021979	1.7325e-08	-0.00397317	0.842345	-1.7979
CNFN	NM_032488	1.7563e-08	0.107981	1.19642	-2.1264
RP1-177G6.2	NR_028344	1.8138e-08	0.753983	2.15299	-2.6372
CELSR1	NM_014246	1.891e-08	-0.610508	0.235543	-1.7976
TMEM125	NM_144626	1.9059e-08	0.408938	1.37674	-1.9559
ZNF536	NM_014717	1.9431e-08	-0.558945	0.200646	-1.693
C1orf168	NM_001004303	1.9923e-08	-0.78024	0.234148	-2.02
KANK1	NM_015158	2.1147e-08	0.178398	1.04945	-1.829
PPIL1	NM_016059	2.2285e-08	0.774145	1.28808	-1.4279
ANKRD29	NM_173505	2.2965e-08	0.101089	0.67557	-1.4891
GPR150	NM_199243	2.3136e-08	0.357406	2.02763	-3.1826
NFIL3	NM_005384	2.3973e-08	-0.0541632	1.04877	-2.1479
KLF14	NM_138693	2.5938e-08	0.160573	0.867532	-1.6324
C5orf40	NM_001001343	2.6474e-08	-0.635396	0.920292	-2.9397
HM13	NM_030789	3.3184e-08	0.315071	0.767545	-1.3684
SQRDL	NM_021199	3.346e-08	-0.0189846	0.930388	-1.931
ZNF565	NM_001042474	3.4604e-08	0.0530659	0.360615	-1.2376
ZNF524	NM_153219	3.876e-08	0.159014	0.953603	-1.7346
SCAF1	NM_021228	4.0145e-08	0.224244	1.47985	-2.3877
LDLRAP1	NM_015627	4.0574e-08	-0.35363	0.207226	-1.4751
UTS2R	NM_018949	4.0701e-08	0.391973	2.04224	-3.1389
LOC541471	NR_015395	4.0983e-08	-0.381897	0.686284	-2.0968
MGC16121	NR_024607	4.1504e-08	-1.01693	0.523701	-2.9092
LEPRE1	NM_001146289	4.3734e-08	0.337455	0.96925	-1.5495
MSI2	NM_138962	4.3828e-08	0.388254	0.900287	-1.4261
TMEM100	NM_001099640	4.3871e-08	-0.564231	0.383189	-1.9284
NCRNA00287	NR_026677	4.6439e-08	-0.239382	0.349635	-1.5042
LOC100507507	XR_108783	4.833e-08	-0.17487	0.388061	-1.4773
FABP7	NM_001446	4.9624e-08	-0.485674	0.544546	-2.0423
ZNF558	NM_144693	5.0201e-08	0.284589	0.729075	-1.3608
LOC100129617	XR_109326	5.0311e-08	-1.06864	0.222375	-2.447
GGT6	NM_153338	5.5753e-08	0.624621	2.90439	-4.856
TMEM189	NM_001162505	5.607e-08	-0.0917545	0.290669	-1.3035
SPPL2A	NM_032802	6.0192e-08	0.458576	0.88727	-1.346
HS3ST1	NM_005114	6.0211e-08	-0.207681	0.603085	-1.7541
LOC100506966	XR_108881	6.2654e-08	0.318969	1.22621	-1.8755
FOSL2	NM_005253	6.4363e-08	-0.363201	0.687871	-2.0721
EFHC2	NM_025184	6.4658e-08	-0.234112	0.483862	-1.6449
RAX2	NM_032753	6.6008e-08	0.584564	2.72393	-4.4057
THEM5		6.6661e-08	0.137711	1.26642	-2.1866
IGFBP3	NM_000598	7.0114e-08	-0.0093667	0.799276	-1.7516
RCOR2	NM_173587	7.1328e-08	0.639053	2.92787	-4.8865
EDEM2	NM_001145025	7.4811e-08	0.0274929	0.586777	-1.4735
LOC100130837		7.536e-08	-0.180741	0.207128	-1.3085
STOX2	NM_020225	7.6526e-08	0.291305	0.731074	-1.3564
NACC2	NM_144653	7.7814e-08	-0.0917714	0.469936	-1.476
RAB39B	NM_171998	7.8427e-08	0.456655	0.824452	-1.2904
PUS7	NM_019042	7.9339e-08	-0.0742333	0.3302	-1.3236
B3GNT5	NM_032047	8.1234e-08	-0.42691	0.750906	-2.2623
C1S	NM_001734	8.1727e-08	-0.107368	1.12057	-2.3423
FAM163A	NM_173509	8.185e-08	-0.374921	0.658844	-2.0474
TP53INP1	NM_001135733	8.8993e-08	0.40908	0.995849	-1.5019
RPUSD4	NM_001144827	9.0849e-08	0.316438	0.810982	-1.4089
ESRP1	NM_001034915	9.4213e-08	-0.0568291	0.949411	-2.0087
LOC100288985		9.6028e-08	-0.0080144	1.45102	-2.7492
KCNH8	NM_144633	9.6896e-08	-0.0878385	0.629707	-1.6444
SPARCL1	NM_001128310	1.0109e-07	1.13999	2.3779	-2.3586
TMEM163	NM_030923	1.1286e-07	-0.101176	0.963792	-2.0921
KLC3		1.1306e-07	0.730374	3.08651	-5.12
WDR66	NM_001178003	1.1674e-07	-0.270746	0.41208	-1.6053
DHX36	NM_001114397	1.1807e-07	0.697091	1.34203	-1.5637
FMOD	NM_002023	1.2102e-07	-0.0697803	0.740382	-1.7534
COTL1	NM_021149	1.244e-07	0.0498954	0.790379	-1.6707
NADKD1	NM_153013	1.2617e-07	-0.0838151	0.248082	-1.2587
NPAS4	NM_178864	1.2753e-07	-0.869866	0.418635	-2.4427
CFI	NM_000204	1.2899e-07	-0.444985	0.23606	-1.6033
SLC47A1	NM_018242	1.2934e-07	-0.559136	0.488941	-2.0678
NTN4	NM_021229	1.3086e-07	-0.269495	0.392962	-1.5828
FAM65B	NM_014722	1.3339e-07	0.00336355	0.523862	-1.4345
ALDH2	NM_000690	1.3408e-07	0.554454	1.53321	-1.9708
PRTFDC1	NM_020200	1.3423e-07	0.387171	1.10845	-1.6486
NFIB	NM_001190737	1.3897e-07	-0.117451	0.394728	-1.4262
ZNF454	NM_182594	1.4273e-07	-0.0391051	0.335846	-1.2968
COX18	NM_173827	1.4318e-07	0.38178	0.955654	-1.4885
ZMYND15	NM_032265	1.4489e-07	-0.103749	0.414949	-1.4327
ID3	NM_002167	1.456e-07	0.336273	1.36574	-2.0413
CCDC104	NM_080667	1.4666e-07	0.92077	1.85401	-1.9096
LRRC10B	NM_001145077	1.4856e-07	-0.00620151	0.843969	-1.8027
ANKRD33	NM_182608	1.7002e-07	-0.129215	0.29208	-1.3391
CDKN2A	NM_000077	1.8237e-07	-0.338677	0.636314	-1.9656
C1R	NM_001733	1.8586e-07	-0.192143	0.703783	-1.8608
RPRM	NM_019845	1.9492e-07	-0.674506	0.256389	-1.9065
ERN1	NM_001433	1.9736e-07	-0.367912	0.405685	-1.7095
FAM167A	NM_053279	2.0066e-07	-0.0798814	0.970699	-2.0714
HIP1R	NM_003959	2.0796e-07	0.0908161	1.02865	-1.9156
ELMOD3	NM_032213	2.1953e-07	0.130602	0.990744	-1.8152
BHLHE40	NM_003670	2.215e-07	0.203692	1.3487	-2.2115
FAM3B	NM_058186	2.2374e-07	-0.843152	0.152025	-1.9933
GALNT14	NM_024572	2.2943e-07	-0.220383	0.56005	-1.7176
NCRNA00115	NR_024321	2.3095e-07	-0.381668	0.0735003	-1.3709
LRRC6	NM_012472	2.3617e-07	-0.106333	0.236365	-1.2681
ATF3	NM_001030287	2.3645e-07	-0.66774	0.604631	-2.4156
KIAA1659	XM_001723799	2.4087e-07	-0.272852	0.146969	-1.3378
CNGA3	NM_001079878	2.4097e-07	-0.315884	0.499284	-1.7595
RBM24	NM_001143941	2.4234e-07	-0.188126	0.617055	-1.7474
ELMO3	NM_024712	2.4659e-07	0.16062	0.782726	-1.5391
FAM181A	NM_138344	2.5063e-07	-0.128769	0.471039	-1.5155
NEFH	NM_021076	2.55e-07	-0.255288	1.12495	-2.6031
CAPSL	NM_001042625	2.6129e-07	0.295558	0.96789	-1.5936
RAI14	NM_001145520	2.6522e-07	-0.128573	0.351512	-1.3948
YAP1	NM_001130145	2.6548e-07	-0.223989	0.380557	-1.5205
CHD5	NM_015557	2.9426e-07	-0.461882	-0.0832135	-1.3001
EPHX1	NM_000120	2.9604e-07	0.333355	1.24506	-1.8813
MCTP1	NM_001002796	2.9695e-07	-0.76825	-0.0234597	-1.6757
TMBIM1	NM_022152	2.9871e-07	0.22217	0.886266	-1.5846
SCGB2A1	NM_002407	3.0322e-07	-0.400467	0.3836	-1.722
TLE3	NM_001105192	3.1219e-07	-0.63199	-0.203472	-1.3459
CTHRC1	NM_138455	3.2925e-07	-0.283024	0.279317	-1.4767
RAB30	NM_014488	3.3632e-07	-0.205538	0.0887865	-1.2263
MOK	NM_014226	3.3862e-07	0.192115	1.22899	-2.0518
NCRNA00246B	NR_026594	3.491e-07	0.350537	0.986246	-1.5537
CSDA	NM_001145426	3.6124e-07	-0.568418	1.31046	-3.6779
2014-03-11	NM_001102562	3.6426e-07	-0.218001	0.500896	-1.6459
TRIM39	NM_021253	3.8046e-07	0.524793	0.800114	-1.2103
FAM57A	NM_024792	3.8191e-07	0.0220592	0.379166	-1.2809
C11orf54	NM_014039	3.8895e-07	0.543107	1.10039	-1.4715
SASH1	NM_015278	3.9907e-07	-0.117663	0.493893	-1.5279
EIF1AD	NM_032325	4.0513e-07	0.439297	0.83272	-1.3135
ARHGAP8	NM_001017526	4.101e-07	-0.690051	0.165866	-1.8099
GBP3	NM_018284	4.2008e-07	-0.105637	0.66715	-1.7086
CFB	NM_001710	4.49e-07	-0.540024	0.107815	-1.5668
TSHZ3	NM_020856	4.5135e-07	-0.155227	0.413937	-1.4837
SPCS3	NM_021928	4.6475e-07	0.54743	1.12191	-1.4891
CEP89	NM_032816	4.6602e-07	0.0424068	0.532325	-1.4044
KLRD1	NM_001114396	4.6623e-07	-0.917324	0.00816103	-1.8993
LOC100506478	XR_110493	4.6995e-07	-1.59749	-0.994021	-1.5194
C11orf96	NM_001145033	4.9069e-07	0.639235	1.73952	-2.144
LOC100510224	XR_113858	5.0616e-07	-0.542274	0.181971	-1.652
LINC00162	NR_024089	5.0894e-07	-0.597254	0.144445	-1.6721
CEL	NM_001807	5.2502e-07	-0.314836	2.92157	-9.4244
RASD1	NM_016084	5.3759e-07	0.369339	1.60887	-2.3612
FAM27E3	XM_001720463	5.8119e-07	0.555558	1.05206	-1.4108
SCHIP1	NM_014575	5.8625e-07	0.540496	1.4433	-1.8697
C3orf59	NM_178496	5.9123e-07	0.339631	1.07045	-1.6596
RSPH1	NM_080860	5.9439e-07	1.0713	1.5816	-1.4243
METTL21A	NM_001127395	6.073e-07	0.00736273	0.457648	-1.3663
LHX3	NM_014564	6.2584e-07	-0.422928	0.694732	-2.1699
ROBO2	NM_001128929	6.6267e-07	-0.823009	-0.219766	-1.5191
IPO4	NM_024658	6.9952e-07	0.0624643	0.428603	-1.2889
YPEL4	NM_145008	7.0716e-07	-0.345163	0.412419	-1.6907
PTPRD	NM_001040712	7.118e-07	-0.578954	0.149942	-1.6574
MYO7A	NM_000260	7.2722e-07	-0.280296	0.344337	-1.5418
FAM43A	NM_153690	7.3363e-07	-0.543246	0.105362	-1.5677
ZDHHC16	NM_032327	7.5825e-07	0.427976	0.758471	-1.2574
ROPN1	NM_017578	7.6411e-07	-0.496979	-0.0760691	-1.3388
EMP2	NM_001424	7.6589e-07	-0.115602	0.363578	-1.394
MAGEL2	NM_019066	7.7131e-07	0.128128	1.21258	-2.1206
SMPDL3A	NM_006714	7.8421e-07	0.0359467	0.699207	-1.5837
TNFSF13	NM_001198622	8.1026e-07	-0.357395	-0.00919143	-1.273
TMEM98	NM_001033504	8.1048e-07	-0.050693	0.527944	-1.4934
SIPA1L2	NM_020808	8.169e-07	-0.214852	0.39509	-1.5262
POC1B	NM_172240	8.2588e-07	0.105373	0.581138	-1.3907
ACY1	NM_000666	8.2824e-07	0.170379	0.743448	-1.4877
C6orf176	NR_026860	8.3757e-07	-0.61764	0.50066	-2.1709
CCDC39	NM_181426	8.8092e-07	-0.767325	-0.284129	-1.3978
ESRRG	NM_001134285	8.8373e-07	-0.207936	0.253834	-1.3772
KCNN2	NM_021614	8.9374e-07	-0.0363884	0.835054	-1.8295
FANK1	NM_145235	9.0646e-07	0.160458	0.616829	-1.3721
NDUFAF2	NM_174889	9.092e-07	0.935427	1.31005	-1.2965
FOXL2	NM_023067	9.6763e-07	-0.0395162	0.919064	-1.9434
C11orf74	NM_138787	9.7202e-07	0.481056	0.878269	-1.317
LATS2	NM_014572	9.7755e-07	-0.519318	0.110889	-1.5478
PIM3	NM_001001852	9.8523e-07	0.994708	1.54149	-1.4608
C2orf40	NM_032411	9.9252e-07	0.905668	1.8342	-1.9033
TDO2	NM_005651	9.9522e-07	-0.668179	0.12737	-1.7357
KCNT2	NM_198503	1.0361e-06	-0.169954	1.10075	-2.4128
RWDD4	NM_152682	1.0449e-06	0.927532	1.52737	-1.5155
FBN3	NM_032447	1.0973e-06	-0.211063	0.363967	-1.4897
PDCD7	NM_005707	1.0985e-06	0.584956	1.15201	-1.4815
IL17RA	NM_014339	1.138e-06	-0.229595	0.346599	-1.4909
FAM167B	NM_032648	1.1427e-06	-0.172855	0.415724	-1.5038
SYT7	NM_004200	1.1508e-06	-0.987272	-0.147157	-1.7902
ZNF414	NM_001146175	1.1542e-06	0.222409	1.00565	-1.721
GMNN	NM_015895	1.1761e-06	0.309615	0.806539	-1.4112
GPR62	NM_080865	1.1909e-06	-0.342026	0.18809	-1.444
CARHSP1	NM_001042476	1.2108e-06	-0.0993192	0.328675	-1.3454
NKX2-2	NM_002509	1.2211e-06	-0.738692	0.761711	-2.8292
GPANK1	NM_033177	1.2621e-06	0.604598	1.43605	-1.7795
COL9A2	NM_001852	1.2939e-06	-0.182679	0.65364	-1.7855
RNF149	NM_173647	1.3142e-06	0.945237	1.45595	-1.4248
PHF13	NM_153812	1.339e-06	0.622888	1.20392	-1.4959
CORO1C	NM_014325	1.3864e-06	0.350222	1.09453	-1.6752
NUDT5	NM_014142	1.453e-06	0.973334	1.3666	-1.3134
MED26	NM_004831	1.4659e-06	0.359933	0.902314	-1.4564
NANP	NM_152667	1.5353e-06	-0.0884676	0.290326	-1.3003
C6orf145	NM_183373	1.565e-06	-0.193783	0.330671	-1.4384
DPCD	NM_015448	1.5886e-06	0.866934	1.22266	-1.2796
WIF1	NM_007191	1.6122e-06	-0.647778	0.252266	-1.8661
TNFRSF1A	NM_001065	1.6298e-06	0.0815783	0.668933	-1.5025
LYSMD3	NM_198273	1.6438e-06	0.658826	1.11283	-1.3698
SLIT2	NM_004787	1.7195e-06	-0.438801	0.0827631	-1.4355
ANAPC16	NM_173473	1.7568e-06	0.830715	1.65826	-1.7747
GAS1	NM_002048	1.7695e-06	-0.398274	1.09541	-2.8161
MYO5B	NM_001080467	1.8007e-06	0.241823	0.948533	-1.6321
ZNF750	NM_024702	1.8309e-06	-0.592443	-0.0767291	-1.4297
IGSF3	NM_001007237	1.8465e-06	-0.329676	0.0675047	-1.3169
NSUN6	NM_182543	1.879e-06	-0.03538	0.32514	-1.2839
HSPC159	NM_014181	1.9632e-06	0.0844161	1.10627	-2.0305
NCAPG2	NM_017760	2.0394e-06	0.15078	0.691021	-1.4542
PARP12	NM_022750	2.068e-06	0.120672	0.679789	-1.4734
TMEM61	NM_182532	2.08e-06	0.497376	1.03313	-1.4497
LPPR2	NM_001170635	2.0901e-06	0.170877	0.542582	-1.2939
ALDH1A2	NM_003888	2.1942e-06	-0.555909	0.720487	-2.4223
RNASE4	NM_002937	2.2302e-06	-0.362754	0.523461	-1.8483
IGLC7	XM_002348112	2.2507e-06	-0.741487	0.31337	-2.0775
SELRC1	NM_023077	2.2992e-06	0.0989345	0.646916	-1.462
BTG2	NM_006763	2.3128e-06	0.465421	1.9468	-2.7921
ANO10	NM_018075	2.3223e-06	-0.0690978	0.406197	-1.3902
ZNF26	NM_019591	2.3242e-06	0.0350206	0.614176	-1.494
C2CD4A	NM_207322	2.3262e-06	-0.500298	0.778761	-2.4268
PDXDC1	NM_015027	2.3341e-06	0.0364099	0.488461	-1.368
PHACTR3	NM_080672	2.3469e-06	-0.342828	0.901232	-2.3686
SH3PXD2B	NM_001017995	2.3501e-06	-0.346227	0.00979436	-1.2799
LDOC1L	NM_032287	2.3999e-06	0.698957	1.3401	-1.5596
GPR120	NM_001195755	2.4064e-06	-0.570575	0.309561	-1.8405
C4orf47	NM_001114357	2.4128e-06	-0.710859	-0.220739	-1.4046
TRMT1L	NM_030934	2.469e-06	0.221062	0.622168	-1.3205
UFM1	NM_016617	2.5111e-06	0.260506	0.860257	-1.5155
FAT1	NM_005245	2.52e-06	-0.102789	0.87372	-1.9677
NHSL1	NM_001144060	2.5922e-06	-0.905562	-0.447146	-1.374
ARHGEF10	NM_014629	2.6415e-06	-0.395406	0.0549999	-1.3664
RAB10	NM_016131	2.6782e-06	0.955947	1.4308	-1.3898
ZNF664	NM_152437	2.6921e-06	0.939429	1.94824	-2.0122
C4orf3	NM_001001701	2.7377e-06	0.785964	1.55429	-1.7033
NEMF	NM_004713	2.7528e-06	0.771597	1.7899	-2.0255
TRIB3	NM_021158	2.8109e-06	-0.18731	0.613695	-1.7423
GPR158	NM_020752	2.8246e-06	0.789451	1.41137	-1.5389
SUSD4	NM_001037175	2.9182e-06	-0.263337	0.47937	-1.6733
PARVA	NM_018222	2.9487e-06	-0.12266	0.2218	-1.2697
CDKN2B	NM_004936	2.9716e-06	-0.471719	0.334649	-1.7488
LPAR6	NM_001162497	3.1235e-06	0.109617	0.701701	-1.5074
UGT2A1	NM_006798	3.1968e-06	-0.268735	0.48476	-1.6859
GABRB1	NM_000812	3.2355e-06	0.174726	1.08223	-1.8758
ZNF425	NM_001001661	3.2678e-06	-0.114621	0.240837	-1.2794
BEND4	NM_001159547	3.3887e-06	-0.862542	-0.140534	-1.6495
SULF2	NM_001161841	3.4215e-06	-0.0672076	0.84381	-1.8804
SYT17	NM_016524	3.4746e-06	0.0918905	0.863659	-1.7074
MICAL1	NM_001159291	3.5091e-06	-0.177481	0.25811	-1.3525
ZNF655	NM_001009958	3.523e-06	0.838002	1.68155	-1.7945
LOC100133660		3.5497e-06	-0.056971	0.353458	-1.3291
CSHL1	NM_001318	3.5521e-06	-0.610985	3.28935	-14.932
TOX3	NM_001080430	3.6073e-06	-0.248508	0.638049	-1.8488
C5orf24	NM_001135586	3.6128e-06	1.21276	1.82242	-1.5259
PLAGL1	NM_001080951	3.6488e-06	-0.270971	1.30511	-2.9816
COCH	NM_001135058	3.6593e-06	0.133984	0.773094	-1.5574
IQCA1	NM_024726	3.7048e-06	0.0830452	0.7881	-1.6302
DIRC1	NM_052952	3.7284e-06	-0.0497299	1.479	-2.8853
SGCD	NM_000337	3.7624e-06	-0.761672	-0.159306	-1.5182
PHF21B	NM_001135862	3.7708e-06	0.58715	1.0627	-1.3904
BLM	NM_000057	3.8336e-06	-0.541748	0.137088	-1.6008
COG3	NM_031431	3.9734e-06	0.341156	0.672776	-1.2584
TUBB8	NM_177987	4.0334e-06	-0.288033	0.2322	-1.4342
PCP4L1	NM_001102566	4.0817e-06	-0.109452	1.30015	-2.6566
ZFP36L2	NM_006887	4.1219e-06	-0.281567	0.552855	-1.7831
ETHE1	NM_014297	4.1444e-06	0.0337209	0.503037	-1.3845
CACNA1B	NM_000718	4.1932e-06	-0.365385	0.529356	-1.8593
MESDC1	NM_022566	4.2242e-06	0.380478	0.82561	-1.3614
RPS16P5		4.2642e-06	-0.121492	0.709346	-1.7787
PCDHB14	NM_018934	4.4068e-06	0.0742717	0.439556	-1.2881
TNNC1	NM_003280	4.4092e-06	-0.88447	-0.106985	-1.7141
TFPI	NM_001032281	4.4852e-06	-0.407422	0.246024	-1.5729
PPL	NM_002705	4.4914e-06	0.195359	0.857651	-1.5826
DNAL1	NM_031427	4.5522e-06	0.303548	0.558973	-1.1937
LCE5A	NM_178438	4.5728e-06	0.661692	2.45817	-3.4737
MEG3	NR_002766	4.5897e-06	-0.0706398	1.4127	-2.796
FUCA2	NM_032020	4.5967e-06	0.306915	0.792432	-1.4001
FZD5	NM_003468	4.7695e-06	-0.0936544	0.378951	-1.3876
LOC100506563	XR_109876	4.7882e-06	-0.0947493	0.451049	-1.4598
MCMBP	NM_024834	1.50314e-05	0.256852	0.70551	-1.3648
LOC100129895		1.5145e-05	-0.632274	-0.130667	-1.4158
PLIN5	NM_001013706	1.51479e-05	-0.0219089	0.671905	-1.6176
SRPX	NM_001170750	1.51909e-05	-0.191951	0.349143	-1.4551
TIAM1	NM_003253	1.52431e-05	-0.152559	0.841196	-1.9914
UFL1	NM_015323	1.52466e-05	0.443456	1.18491	-1.6719
PTPN14	NM_005401	1.52616e-05	-0.563212	-0.101123	-1.3775
FAM111A	NM_001142519	1.52666e-05	0.0442814	0.62614	-1.4968
ZNRF2	NM_147128	1.52762e-05	-0.0378366	0.248039	-1.2192
MMGT1	NM_173470	1.53012e-05	0.936089	1.60745	-1.5926
LYRM7	NM_181705	1.53017e-05	0.342791	0.885627	-1.4568
SERPING1	NM_000062	1.53171e-05	-0.1497	0.803685	-1.9364
FOPNL	NM_144600	1.53235e-05	-0.230052	-0.0433843	-1.1381
C9orf21	NM_153698	1.54004e-05	-0.0892005	0.286852	-1.2978
PPP1R3B	NM_024607	1.56661e-05	-0.307769	0.311463	-1.5361
IFT43	NM_052873	1.58993e-05	0.872231	1.47996	-1.5239
IST1	NM_014761	1.59101e-05	0.42626	1.28385	-1.812
MLLT4	NM_001040000	1.60575e-05	-0.352342	-0.00783136	-1.2697
LOC284219		1.63067e-05	-0.219565	0.322097	-1.4556
TMEM138	NM_016464	1.63925e-05	0.451689	0.921564	-1.385
WBSCR17	NM_022479	1.65072e-05	-0.385543	0.211949	-1.5131
STARD3NL	NM_032016	1.6737e-05	1.07372	1.64935	-1.4903
GNRHR	NM_000406	1.67807e-05	-0.456375	0.232537	-1.6121
AVPI1	NM_021732	1.67842e-05	0.0211341	0.53139	-1.4243
TC2N	NM_001128595	1.68042e-05	-0.133077	0.452154	-1.5003
PLSCR4	NM_001128306	1.70342e-05	0.132003	0.905071	-1.7089
DEDD2	NM_133328	1.70393e-05	0.816926	1.32111	-1.4183
C9orf119	NM_001040011	1.70409e-05	0.687427	1.15863	-1.3863
CMTM4	NM_178818	1.72699e-05	0.725808	1.46619	-1.6706
FLJ41170	XR_041854	1.74575e-05	-1.05579	-0.12094	-1.9117
IFT172	NM_015662	1.74726e-05	0.785102	1.42194	-1.5549
ANKK1	NM_178510	1.75248e-05	0.898195	2.90714	-4.0249
FOS	NM_005252	1.75342e-05	0.102316	1.87102	-3.4075
PRRC2C	NM_015172	1.7732e-05	0.513231	1.34008	-1.7738
CYBRD1	NM_001127383	1.77461e-05	0.00943897	1.06913	-2.0845
FLVCR1	NM_014053	1.78281e-05	0.647265	1.37382	-1.6547
FBXO32	NM_058229	1.79246e-05	-0.356305	0.608064	-1.9512
CYR61	NM_001554	1.80361e-05	-0.364845	0.534464	-1.8652
ZDHHC8	NM_001185024	1.80445e-05	0.248004	0.519301	-1.2069
WDR54	NM_032118	1.82211e-05	0.93677	1.3955	-1.3743
LOC100506029	XR_110481	1.82968e-05	0.477335	0.85671	-1.3008
DLG5	NM_004747	1.83592e-05	0.09931	0.72137	-1.5391
ACVR1C	NM_001111031	1.84148e-05	0.391685	0.886818	-1.4095
OR7A5	NM_017506	1.8447e-05	-0.725572	-0.214339	-1.4253
SCUBE2	NM_001170690	1.84916e-05	-0.0910933	0.360625	-1.3677
ARHGEF19	NM_153213	1.87992e-05	-0.27673	0.188912	-1.3809
CLDN7	NM_001185022	1.88299e-05	-0.163964	0.414309	-1.4931
C21orf63	NM_058187	1.89074e-05	0.119344	0.481442	-1.2853
ZC3HAV1L	NM_080660	1.89813e-05	0.147115	0.860557	-1.6397
NPTX2	NM_002523	1.8999e-05	0.400288	3.03608	-6.2152
KRT8	NM_002273	1.90341e-05	0.191751	1.17224	-1.9731
TBC1D23	NM_018309	1.92844e-05	0.707803	1.1583	-1.3665
ANKRD23	NM_016466	1.94126e-05	-0.586693	0.207123	-1.7337
PIGV	NM_017837	1.95095e-05	0.303583	0.875849	-1.4869
NACA	NM_001113201	1.95155e-05	0.0681135	0.593326	-1.4391
CAMK2N2	NM_033259	1.95188e-05	0.237305	0.649495	-1.3307
ID2	NM_002166	1.96981e-05	-0.0517833	0.503183	-1.4691
LITAF	NM_001136472	1.97654e-05	0.0148797	1.26631	-2.3808
USP36	NM_025090	1.98386e-05	0.0973595	0.605496	-1.4222
CP	NM_000096	1.99668e-05	-0.559228	0.117969	-1.599
ENPP6	NM_153343	2.0219e-05	-0.928467	-0.125325	-1.7449
OSTC	NM_021227	2.0347e-05	1.34533	1.78796	-1.3591
CHST1	NM_003654	2.0604e-05	-0.374317	0.205543	-1.4947
TAMM41	NM_138807	2.088e-05	0.142539	0.859183	-1.6434
MCCC1	NM_020166	2.1108e-05	0.457554	1.03189	-1.489
LGI3	NM_139278	2.1124e-05	0.0127972	0.576746	-1.4783
BBS2	NM_031885	2.1192e-05	0.779643	1.41393	-1.5522
OSTCP1	NR_028496	2.1235e-05	0.10735	0.559394	-1.368
SNORD114-3	NR_003195	2.125e-05	-0.689649	0.947656	-3.1108
DCN	NM_001920	2.1407e-05	0.361119	1.47068	-2.1578
PTP4A3	NM_007079	2.1432e-05	0.246462	0.808635	-1.4765
EIF2D	NM_006893	2.1434e-05	0.127399	0.761674	-1.5522
C14orf159	NM_001102366	2.1451e-05	0.358082	0.97126	-1.5296
SLC39A12	NM_001145195	2.1953e-05	-0.652407	-0.105435	-1.461
KLK11	NM_001136032	2.2081e-05	-0.540174	0.265613	-1.7481
PAX6	NM_000280	2.2289e-05	-0.403875	0.26347	-1.5881
SLC44A3	NM_001114106	2.2441e-05	0.100763	0.703503	-1.5186
FAM133A	NM_001171109	2.2535e-05	0.279222	0.686017	-1.3257
ZNRD1	NM_014596	2.2571e-05	0.398073	0.871095	-1.388
EID2	NM_153232	2.2625e-05	0.69231	1.16845	-1.391
FBXL3	NM_012158	2.2715e-05	0.195798	0.648519	-1.3686
GNG5	NM_005274	2.2962e-05	0.609502	1.49096	-1.8422
FBLN5	NM_006329	2.3034e-05	-0.38128	0.35422	-1.665
RRN3P2	NR_003369	2.3103e-05	-0.598886	-0.290901	-1.238
PUS3	NM_031307	2.3719e-05	0.406089	0.938669	-1.4465
RFPL1S	NR_002727	2.3866e-05	-0.380219	0.148842	-1.443
KLF15	NM_014079	2.3886e-05	-0.182106	0.36968	-1.4659
FBXO30	NM_032145	2.4595e-05	0.45737	0.857536	-1.3197
GMPPB	NM_013334	2.4626e-05	-0.073357	0.347823	-1.339
JMJD7-PLA2G4B	NM_005090	2.4937e-05	0.539817	1.53224	-1.9895
PDZD4	NM_032512	3.5002e-05	-0.0970198	0.261368	-1.282
SELS	NM_018445	3.5191e-05	1.50484	1.74594	-1.1819
BVES	NM_007073	3.5362e-05	-0.757368	-0.0878026	-1.5906
NT5DC2	NM_001134231	3.5401e-05	0.0296044	0.59228	-1.477
RABGEF1	NM_014504	3.5445e-05	0.186915	0.728392	-1.4555
ST3GAL6	NM_006100	3.5652e-05	-0.401501	0.034662	-1.353
EBPL	NM_032565	3.6046e-05	0.790728	1.11551	-1.2525
LOC100288656		3.6232e-05	-0.0591359	0.718372	-1.7142
NSMCE2	NM_173685	3.6763e-05	0.397555	0.672141	-1.2096
SCPEP1	NM_021626	3.6791e-05	0.432062	1.08058	-1.5676
TRIP6	NM_003302	3.7434e-05	-0.0388875	0.445501	-1.399
CTBS	NM_004388	3.7662e-05	0.236106	0.831305	-1.5107
SERINC5	NM_001174071	3.8063e-05	0.126584	0.834245	-1.6332
CEP19	NM_032898	3.8258e-05	-0.05983	0.287907	-1.2726
C3orf17	NM_015412	3.8298e-05	0.755861	1.41527	-1.5794
DUSP18	NM_152511	3.8402e-05	0.436753	0.963393	-1.4406
SLC26A11	NM_001166347	3.8739e-05	0.897171	1.52677	-1.5471
LOC442421	NR_024496	3.8798e-05	0.874966	1.23218	-1.281
ZNF184	NM_007149	3.884e-05	-0.0985084	0.243695	-1.2677
PMAIP1	NM_021127	3.9205e-05	-0.608628	0.932526	-2.9103
SNHG5	NR_003038	3.9235e-05	1.63006	2.10525	-1.3901
GJB7	NM_198568	3.9679e-05	-0.171782	0.780477	-1.9349
ADCY9	NM_001116	3.9835e-05	-0.0349572	0.406766	-1.3582
KCNK12	NM_022055	4.0021e-05	-0.149848	0.291207	-1.3576
LINC00239	NR_026774	4.0056e-05	-0.906889	0.252655	-2.2339
SLC26A6	NM_001040454	4.0292e-05	-0.110645	0.194444	-1.2355
NUFIP2	NM_020772	4.0342e-05	0.323139	0.815906	-1.4071
YWHAG	NM_012479	4.0358e-05	1.28563	2.08628	-1.7419
RFX4	NM_002920	4.0409e-05	-0.628428	0.488461	-2.1688
NKAIN1	NM_024522	4.0438e-05	-0.313788	0.255162	-1.4834
ELMOD1	NM_001130037	4.0546e-05	0.798206	1.62716	-1.7764
ANKRD9	NM_152326	4.0816e-05	-0.156862	0.271086	-1.3453
QKI	NM_006775	4.106e-05	-0.20251	0.16487	-1.29
LGR6	NM_001017403	4.1072e-05	-0.086561	0.80869	-1.8599
HIST2H2AB	NM_175065	4.124e-05	0.319083	1.37268	-2.0757
IL27	NM_145659	4.1328e-05	-0.230252	0.315931	-1.4602
ITM2C	NM_001012514	4.1355e-05	1.39274	1.96209	-1.4839
HEY2	NM_012259	4.1363e-05	-0.422338	-0.0711303	-1.2756
PRMT6	NM_018137	4.1376e-05	0.686224	0.960415	-1.2093
SCAF8	NM_014892	4.1464e-05	0.0912017	0.635453	-1.4583
PMS2	NM_000535	4.1468e-05	0.167243	0.930647	-1.6975
CGB	NM_000737	4.1493e-05	-0.186507	2.4528	-6.2303
GPBP1L1	NM_021639	4.153e-05	0.623059	1.25593	-1.5507
FAM189A2	NM_001127608	4.1995e-05	-0.217262	0.170407	-1.3083
MIA	NM_006533	4.2132e-05	-0.103606	0.984202	-2.1255
AKR1C2	NM_001135241	4.2774e-05	-0.441475	0.52238	-1.9505
LOC100507008	XR_110406	4.2805e-05	-0.669871	0.115609	-1.7237
C7	NM_000587	4.2845e-05	-0.27851	0.416699	-1.6191
LCE2D	NM_178430	4.3049e-05	0.543033	0.783393	-1.1813
PRR5	NM_001017528	4.3105e-05	-0.310953	0.517208	-1.7754
LOC648556		4.3405e-05	0.0784184	0.616988	-1.4525
PDGFRL	NM_006207	4.3517e-05	-0.405738	0.225961	-1.5494
CSNK1A1L	NM_145203	4.3522e-05	-0.285452	-0.0188502	-1.203
DLK1	NM_003836	4.3576e-05	0.085856	4.66137	-23.843
ITGA8	NM_003638	4.4324e-05	-0.328052	0.0197937	-1.2727
FLJ30901		4.4711e-05	-0.510834	0.425624	-1.9138
SLC35F3	NM_173508	4.4848e-05	-0.551718	0.112134	-1.5843
LONRF1	NM_152271	4.4904e-05	0.512457	1.07204	-1.4738
HDAC4	NM_006037	5.5384e-05	-0.130378	0.161792	-1.2245
EFEMP1	NM_001039348	5.5587e-05	-0.428774	0.442682	-1.8295
ABCA8	NM_007168	5.5649e-05	-0.459	0.762185	-2.3314
NRBP2	NM_178564	5.5978e-05	-0.0150096	0.334575	-1.2742
LOC100272217	NR_027440	5.6141e-05	0.166555	0.736163	-1.4841
AKR1C3	NM_003739	5.6275e-05	-0.235735	0.47989	-1.6422
EFNA1	NM_004428	5.6498e-05	-0.297388	0.351685	-1.5682
GADD45B	NM_015675	5.6603e-05	-0.474343	1.24188	-3.2857
TGFBI	NM_000358	5.6977e-05	0.333146	1.20845	-1.8344
SH3PXD2A	NM_014631	5.7443e-05	-0.0380476	0.547858	-1.501
SYAP1	NM_032796	5.7477e-05	0.432082	0.762621	-1.2575
DBNDD2	NM_001048226	5.7544e-05	0.683937	1.16205	-1.3929
ZNF805	NM_001023563	5.7577e-05	0.0857163	0.41298	-1.2546
COL4A3	NM_000091	5.7708e-05	-0.117045	0.809352	-1.9005
FUNDC1	NM_173794	5.7933e-05	0.673476	1.25994	-1.5016
CRAMP1L	NM_020825	5.7996e-05	0.327427	0.846077	-1.4326
C12orf5	NM_020375	5.8004e-05	0.323606	0.868889	-1.4593
MGC21881	NR_015363	5.8252e-05	0.762725	1.28308	-1.4343
SLC16A4	NM_004696	5.8313e-05	-0.389189	-0.152626	-1.1782
ZBTB16	NM_001018011	5.8496e-05	0.122261	1.08813	-1.9532
ID1	NM_002165	5.851e-05	0.0770322	1.33458	-2.3909
FAM207A	NM_058190	5.885e-05	0.121098	0.581845	-1.3763
LOC440337	XR_111632	5.9108e-05	-1.55142	-0.771445	-1.7171
TRIM56	NM_030961	5.9231e-05	0.451077	0.872062	-1.3388
NIPAL2	NM_024759	5.9261e-05	0.151941	1.04478	-1.8568
MUC1	NM_001018016	5.9754e-05	-0.49235	-0.231758	-1.198
FXYD1	NM_005031	5.9792e-05	-0.748202	-0.0059081	-1.6728
RALB	NM_002881	5.9918e-05	-0.0562274	0.238384	-1.2266
TNIP2	NM_001161527	6.0075e-05	-0.0272416	0.440762	-1.3832
ARHGAP18	NM_033515	6.0208e-05	0.360956	0.916202	-1.4694
GLDC	NM_000170	6.0487e-05	-0.42734	0.199222	-1.5439
TNFRSF19	NM_018647	6.0585e-05	-0.687367	0.0539098	-1.6717
TTC22	NM_001114108	6.0644e-05	-0.0602913	0.538813	-1.5148
IRAK3	NM_001142523	6.0846e-05	-0.578308	-0.042037	-1.4502
ACPL2	NM_001037172	6.0972e-05	0.587388	1.21816	-1.5484
APOD	NM_001647	6.1727e-05	-0.258974	1.30245	-2.9515
WDR75	NM_032168	6.181e-05	0.479483	0.885249	-1.3248
PMP22	NM_000304	6.1958e-05	-0.0461266	0.771067	-1.762
RPGR	NM_000328	6.2246e-05	0.105164	1.73181	-3.0879
DNALI1	NM_003462	6.2268e-05	0.323256	0.937901	-1.5312
SPON1	NM_006108	6.2322e-05	-0.346519	0.597136	-1.9234
LOC692247	XR_109057	6.2626e-05	-0.121286	0.191503	-1.2421
STAT6	NM_001178078	6.3069e-05	-0.186634	0.347524	-1.4481
LOC286437		6.3214e-05	0.119209	0.518295	-1.3187
CHMP4C	NM_152284	6.3885e-05	0.450152	1.07555	-1.5426
ABCC8	NM_000352	6.4118e-05	0.133086	0.923069	-1.7291
RAB31	NM_006868	6.414e-05	0.0877025	0.590507	-1.417
ENPP1	NM_006208	6.442e-05	-0.110775	0.505981	-1.5334
KRT18	NM_000224	6.4578e-05	0.672617	2.50537	-3.5622
KATNAL1	NM_001014380	6.474e-05	0.471179	0.940613	-1.3846
CLDN11	NM_001185056	7.5644e-05	-0.0367902	0.86263	-1.8653
RAB20	NM_017817	7.5739e-05	-0.622378	-0.165492	-1.3726
BRAT1	NM_152743	7.6258e-05	0.2576	0.890719	-1.5509
LACTB2	NM_016027	7.683e-05	0.172299	0.733589	-1.4756
ICAM2	NM_000873	7.6867e-05	-0.0539722	0.543565	-1.5131
NOA1	NM_032313	7.705e-05	0.210199	0.90568	-1.6194
MED19	NM_153450	7.7135e-05	0.69784	1.27498	-1.4919
JUNB	NM_002229	7.7143e-05	0.164258	1.3647	-2.2981
PTPLA	NM_014241	7.7167e-05	-0.116588	0.301115	-1.3358
SELL	NM_000655	7.7186e-05	-0.447347	0.61171	-2.0836
LTBP1	NM_000627	7.7426e-05	-0.109694	0.753861	-1.8195
DHRS3	NM_004753	7.7719e-05	-0.230628	0.564047	-1.7347
ATP8B1	NM_005603	7.785e-05	-0.54734	-0.00805116	-1.4533
IFITM3	NM_021034	7.8708e-05	0.775055	1.69381	-1.8905
NPBWR1	NM_005285	7.8939e-05	-0.210012	0.256295	-1.3816
SZT2	NM_015284	7.9328e-05	0.360655	1.02522	-1.5851
RAB9B	NM_016370	7.9517e-05	0.456858	0.881278	-1.342
DCBLD1	NM_173674	8.004e-05	0.00130655	0.558347	-1.4712
TMEM49	NM_030938	8.0113e-05	-0.845823	0.0373587	-1.8444
LOC100506108	XR_109979	8.0332e-05	-0.298273	0.253061	-1.4654
GNPDA2	NM_138335	8.0821e-05	0.556789	0.931866	-1.2969
PET112	NM_004564	8.1228e-05	0.016355	0.381236	-1.2878
MIS18A	NM_018944	8.1753e-05	0.204632	0.615998	-1.3299
UBE2B	NM_003337	8.1898e-05	0.00560199	0.452485	-1.3631
ST18	NM_014682	8.2087e-05	-0.066723	0.645294	-1.6381
WRAP73	NM_017818	8.2402e-05	0.0506971	0.473597	-1.3406
FAM110C	NM_001077710	8.2609e-05	-0.525119	0.278311	-1.7452
AMOTL2	NM_016201	8.2721e-05	-0.118533	0.324188	-1.3592
CGB	NM_000737	8.3365e-05	-0.161157	2.51501	-6.3916
NCRNA00294	NR_015451	8.3602e-05	0.698415	1.14662	-1.3643
AXIN2	NM_004655	8.3619e-05	0.0307416	0.283619	-1.1916
IER3	NM_003897	8.4369e-05	-0.253308	0.78483	-2.0536
CHST15	NM_014863	8.4623e-05	-0.0853299	0.595056	-1.6026
ZNF667	NM_022103	8.4624e-05	0.529883	1.19602	-1.5868
TMEM60	NM_032936	9.5367e-05	0.66722	1.17475	-1.4216
TEP1	NM_007110	9.5853e-05	-0.0643219	0.240088	-1.2349
RASA3	NM_007368	9.6137e-05	-0.57722	-0.0885046	-1.4032
ZCCHC2	NM_017742	9.6517e-05	0.187859	0.785218	-1.5129
AADAT	NM_016228	9.7112e-05	-0.70022	-0.110278	-1.5052
CAT	NM_001752	9.7211e-05	-0.244275	0.171088	-1.3336
ZNF785	NM_152458	9.801e-05	0.131881	0.457936	-1.2536
ANXA2	NM_001002857	9.8089e-05	0.430835	1.39515	-1.9511
C3orf34	NM_032898	9.8166e-05	0.115274	0.552988	-1.3545
LOC283508		9.8208e-05	0.195469	0.810841	-1.532
ART3	NM_001130016	9.8308e-05	-0.851602	-0.164012	-1.6106
NTNG1	NM_001113226	9.843e-05	-0.665341	-0.214899	-1.3665
ALDH1A3	NM_000693	9.8795e-05	-0.277153	0.615096	-1.8561
ZBTB8A	NM_001040441	9.8816e-05	0.694647	1.08311	-1.309
FBXO34	NM_017943	0.000100297	0.365988	0.804175	-1.3549
RGS17	NM_012419	0.00010043	-0.65251	-0.130141	-1.4363
FOXO1	NM_002015	0.000100483	0.0184557	1.09294	-2.106
GYG1	NM_001184720	0.000100539	0.477224	1.31822	-1.7913
MRPL18	NM_014161	0.000100988	0.738525	1.37203	-1.5513
NSUN2	NM_001193455	0.000101612	0.644568	1.04076	-1.316
CAMSAP2	NM_203459	0.000101874	0.0720416	0.56352	-1.4059
FUK	NM_145059	0.000102006	0.435173	0.904792	-1.3847
C4A	NM_001002029	0.000102462	-0.110585	1.05389	-2.2415
SRGN	NM_002727	0.000104048	0.437528	1.38241	-1.925
SFXN2	NM_178858	0.000104208	-0.0365493	0.291019	-1.2549
SOX7	NM_031439	0.000115549	-0.372802	0.458566	-1.7794
SOX8	NM_014587	0.000115578	-0.219554	0.20384	-1.3411
C2orf55	NM_207362	0.000115803	0.0462685	0.536256	-1.4044
IGFLR1	NM_024660	0.000116679	0.116878	0.689728	-1.4875
TRMT6	NM_015939	0.000117304	0.548395	0.788017	-1.1807
SFT2D3	NM_032740	0.000117405	0.145492	0.368889	-1.1675
INTU	NM_015693	0.000117627	0.343288	0.701395	-1.2817
TSNAXIP1	NM_018430	0.000118308	-0.018214	0.265451	-1.2173
NAMPT	NM_005746	0.000118961	-0.0405465	0.961448	-2.0028
SHANK3	NM_001080420	0.000119265	0.552279	0.913052	-1.2841
PHLDA2	NM_003311	0.000119285	-0.454517	-0.0274762	-1.3445
LZTR1	NM_006767	0.000119516	0.22665	0.662698	-1.3529
POLR3E	NM_018119	0.000120328	-0.0653152	0.200842	-1.2026
SRPX2	NM_014467	0.000120343	-2826.01	-0.679456	#NAME?
KIFC2	NM_145754	0.000120549	0.407396	0.776464	-1.2915
EFTUD2	NM_001142605	0.000120674	0.520496	1.0145	-1.4083
C9orf135	NM_001010940	0.000121419	0.816214	1.35792	-1.4557
GMPPA	NM_013335	0.000123367	-0.0323297	0.406086	-1.3551
LOC100505875	XR_109792	0.00012373	-0.431079	0.250214	-1.6036
CBS	NM_000071	0.000124076	-0.383484	0.262309	-1.5646
STX5	NM_003164	0.000135108	0.257375	0.845027	-1.5028
NRN1	NM_016588	0.000135575	-0.471361	0.329227	-1.7418
C8orf83	NM_001171795	0.000135595	0.845126	1.41502	-1.4844
UBE2E2	NM_152653	0.000135625	0.0878315	0.691174	-1.5192
LOC257152		0.000135661	-0.146347	0.1334	-1.214
WFDC10B	NM_172006	0.000136397	0.288081	2.0437	-3.3767
TNFRSF11A	NM_003839	0.000136854	-0.035467	0.714354	-1.6816
BIN3	NM_018688	0.000137083	0.159723	0.561235	-1.3209
HLA-DQB1	NM_002123	0.000137575	-0.23421	0.485396	-1.6467
LOC100509093	XR_112698	0.000137914	-0.494882	-0.0888425	-1.325
C10orf11	NM_032024	0.000137951	-0.391716	0.0767598	-1.3836
PRMT10	NM_138364	0.0001384	0.133728	0.652191	-1.4324
RBP7	NM_052960	0.000138446	-0.226967	0.385085	-1.5284
TMEM214	NM_001083590	0.00013905	0.310879	0.851172	-1.4543
CLGN	NM_001130675	0.000139595	0.332696	1.09186	-1.6925
IFITM1	NM_003641	0.00013983	0.44154	1.28741	-1.7974
NXT1	NM_013248	0.000139854	0.274861	0.744748	-1.385
BSDC1	NM_001143888	0.000140055	0.490294	1.15101	-1.5809
SLC36A4	NM_152313	0.0001404	0.719289	1.00043	-1.2152
EIF2C3	NM_024852	0.000140685	0.678682	1.20683	-1.4421
LOC100130713		0.000141248	-0.302781	-0.0273794	-1.2103
KCNJ16	NM_018658	0.000141749	-0.546275	0.284608	-1.7788
HACE1	NM_020771	0.000141899	0.20551	0.516956	-1.241
ECHDC3	NM_024693	0.000142083	-0.178923	0.296166	-1.39
FAM208A	NM_015224	0.00014321	0.125645	0.627779	-1.4163
RG9MTD3	NM_144964	0.000144207	0.244781	0.588021	-1.2686
MOB2	NM_001172223	0.000144684	0.138967	0.497822	-1.2824
JAGN1	NM_032492	0.000144767	0.848947	1.2174	-1.291
TGFBR3	NM_001195683	0.000156461	0.193476	1.45168	-2.392
CACNA2D2	NM_001005505	0.000156526	0.0667252	0.507437	-1.3573
IGLL3P	NR_029395	0.000156588	-0.643167	-0.0952035	-1.462
CT45A1	NM_001017417	0.000157592	-1.37843	0.600867	-3.943
RIN2	NM_018993	0.000157705	0.0217417	0.740273	-1.6455
CEP112	NM_145036	0.000157919	-0.136743	0.120778	-1.1954
STEAP2	NM_001040665	0.000158029	0.954803	1.59677	-1.5605
FAM63A	NM_001040217	0.000158164	0.432042	1.00373	-1.4863
SBNO1	NM_001167856	0.000158223	0.124688	0.541901	-1.3353
PHF6	NM_001015877	0.000158727	0.61366	1.15799	-1.4583
FIGN	NM_018086	0.000159539	-0.420585	0.344096	-1.699
PTBP2	NM_021190	0.000160437	0.358334	0.947647	-1.5045
SRPRB	NM_021203	0.000160596	0.252563	0.83417	-1.4965
HSPB8	NM_014365	0.000162008	0.0966354	0.575133	-1.3933
HKR1	NM_181786	0.000162918	0.354423	0.704151	-1.2743
VGLL4	NM_001128219	0.000164119	0.220845	0.741905	-1.435
A4GALT	NM_017436	0.000164191	-0.350731	-0.0375553	-1.2424
ZNF611	NM_001161499	0.000164848	0.261217	0.6638	-1.3219
FHL2	NM_001039492	0.000164982	-0.246892	0.468542	-1.642
DOK7	NM_001164673	0.000175591	-0.350917	0.470829	-1.7675
LCE2C	NM_178429	0.000176406	0.523782	0.819896	-1.2278
AIF1L	NM_001185095	0.000176474	-0.181632	0.458099	-1.558
DLGAP2	NM_004745	0.000177454	-0.383935	0.0538552	-1.3545
KLF5	NM_001730	0.000177523	-0.200447	0.223508	-1.3416
RARRES1	NM_002888	0.000177843	-0.398087	0.860252	-2.3922
IL6R	NM_000565	0.000180223	-0.247093	0.486245	-1.6625
LOC100505895	XR_108841	0.00018086	-0.352345	-0.099129	-1.1919
DYX1C1	NM_001033559	0.000181347	0.181058	0.448663	-1.2038
CDKN1A	NM_000389	0.00018192	0.058403	0.902469	-1.7951
CYP2R1	NM_024514	0.000182649	0.349929	1.0107	-1.5809
MIB1	NM_020774	0.000182664	0.58361	1.23718	-1.5731
SPRYD3	NM_032840	0.000183421	0.764939	1.18518	-1.3381
HOOK3	NM_032410	0.000183598	-0.0540772	0.328228	-1.3034
SELM	NM_080430	0.000183907	1.31547	1.72757	-1.3306
C1orf59	NM_001102592	0.000184585	-0.0570213	0.455796	-1.4268
LOC100290566	XR_109384	0.000184669	0.703836	1.05071	-1.2718
ANXA3	NM_005139	0.000195889	-0.167619	0.419984	-1.5027
UNC5A	NM_133369	0.000196183	-0.573536	0.251232	-1.7712
SMYD4	NM_052928	0.000199431	0.0165459	0.256595	-1.181
STK11IP	NM_052902	0.00020068	0.00333601	0.227574	-1.1682
FAM174B	NM_207446	0.00020081	0.262257	0.892278	-1.5476
PIP5K1B	NM_003558	0.00020105	-0.221362	0.543986	-1.6998
TMEM200C	NM_001080209	0.00020169	-0.834216	-0.219171	-1.5316
TMEM63B	NM_018426	0.00021503	0.124878	0.523741	-1.3185
SCT	NM_021920	0.00021605	-0.460606	0.0578302	-1.4324
CD24	NM_013230	0.00021692	-0.025288	0.595995	-1.5382
LOC100506696	XR_108329	0.00021723	-0.0993819	0.239027	-1.2644
USP13	NM_003940	0.00021723	-0.0731629	0.336518	-1.3284
THBS2	NM_003247	0.00021813	-0.377009	0.538755	-1.8866
GRAMD4	NM_015124	0.0002186	0.0662278	0.521247	-1.3708
ZSCAN21	NM_145914	0.00021942	-0.0674211	0.229108	-1.2282
SLC1A5	NM_001145144	0.0002195	-0.424779	-0.137909	-1.22
ISG20	NM_002201	0.00021955	-0.343375	0.48674	-1.7778
TNFAIP8L1	NM_001167942	0.00021967	-0.420949	-0.0585659	-1.2855
OSBPL11	NM_022776	0.00021977	0.109005	0.432273	-1.2512
LRRC8C	NM_032270	0.00022039	0.0104452	0.514195	-1.4179
FERMT2	NM_001134999	0.00022066	-0.0595182	0.27733	-1.263
FRMD5	NM_032892	0.00022074	-0.409006	-0.112939	-1.2278
C19orf30	NR_027148	0.00022086	0.903027	1.8308	-1.9023
ELTD1	NM_022159	0.000221	-0.270631	0.0722592	-1.2683
GNL3	NM_014366	0.00022184	0.784314	1.3725	-1.5034
LSM10	NM_032881	0.00022197	0.571329	0.873596	-1.2331
CNDP2	NM_001168499	0.00022338	0.559104	1.16849	-1.5256
VSIG10	NM_019086	0.0002239	-0.0428314	0.199433	-1.1828
TCF7L2	NM_001146274	0.00022421	-0.486705	-0.0396182	-1.3633
AKR1C1	NM_001353	0.00022455	-0.562384	0.244581	-1.7495
SYTL1	NM_001193308	0.00022458	0.04428	0.472766	-1.3458
PRRG4	NM_024081	0.00023594	0.269822	1.02674	-1.6899
MT1H	NM_005951	0.0002361	0.450321	1.10991	-1.5796
NBL1	NM_005380	0.0002362	-0.0195021	0.839865	-1.8142
CD99	NM_001122898	0.00023663	0.693532	1.57505	-1.8423
KCTD1	NM_001136205	0.0002387	-0.147872	0.361084	-1.423
KIAA1737	NM_033426	0.00023989	0.866905	1.22252	-1.2795
RAB34	NM_001142624	0.0002403	-0.159225	0.745922	-1.8727
SDPR	NM_004657	0.00024111	-0.176062	0.0839564	-1.1975
FLJ42875	NR_024371	0.00024239	-0.470472	-0.107884	-1.2857
CWC22	NM_020943	0.00024268	0.191151	0.579326	-1.3087
SLC25A25	NM_001006641	0.00024296	0.563858	1.04857	-1.3993
F13A1	NM_000129	0.00024318	-0.148723	0.418699	-1.4819
ATP13A1	NM_020410	0.00024348	0.392642	0.794058	-1.3208
LOC100287696		0.00024372	0.275106	0.691341	-1.3344
LOC100287628	XR_109254	0.00024492	-0.321707	0.195553	-1.4312
FLJ23867	NM_001004128	0.00025659	-0.781647	-0.350161	-1.3486
WDR34	NM_052844	0.00025842	0.445874	0.867331	-1.3393
LOC100128439		0.0002587	-0.521537	-0.1656	-1.2798
FBLN7	NM_001128165	0.00025939	-0.215218	0.125531	-1.2664
ISM1	NM_080826	0.00025942	-0.82717	-0.319337	-1.4219
PALM2-AKAP2	NM_147150	0.0002598	1.21116	1.37987	-1.1241
TTC32	NM_001008237	0.00026003	0.558291	0.993163	-1.3518
FAM41C	NR_000029	0.00026022	0.169115	0.456169	-1.2201
PSAT1	NM_021154	0.00026165	0.131804	0.546567	-1.3331
GPR89A	NM_001097612	0.00026253	0.677521	1.1362	-1.3743
FAM24B	NM_152644	0.00026341	0.000787772	0.609581	-1.525
ZNF622	NM_033414	0.00026384	0.585976	0.954853	-1.2913
LOC100509886	XR_110642	0.00026467	0.370422	0.800457	-1.3473
MRPS36	NM_033281	0.00027506	0.693821	1.19188	-1.4123
SHISA2	NM_001007538	0.00027637	-0.713544	-0.189757	-1.4377
SLC45A4	NM_001080431	0.00027706	0.194221	0.849614	-1.575
POMC	NM_000939	0.00027805	0.685579	6.93773	-76.223
CCNY	NM_145012	0.00027869	0.42133	0.741194	-1.2482
AACS	NM_023928	0.00027903	0.322963	0.773662	-1.3667
HINT3	NM_138571	0.00027915	-0.0725978	0.348361	-1.3388
GPR176	NM_007223	0.00027991	-0.310944	0.153316	-1.3796
PIGA	NM_002641	0.00028001	-0.0658282	0.151258	-1.1624
MOB1B	NM_173468	0.00028059	-0.114003	0.43229	-1.4603
LOC100506795	NR_038426	0.00028173	-1.14128	-0.569183	-1.4867
C10orf10	NM_007021	0.00028233	0.0729468	1.02283	-1.9317
CCDC127	NM_145265	0.00028433	0.243351	0.565247	-1.25
ETV1	NM_001163147	0.00028441	-0.196723	0.548534	-1.6763
CCL2	NM_002982	0.00028444	-0.49081	0.561619	-2.074
SNTG2	NM_018968	0.000296	-0.460187	0.452718	-1.8828
ZSWIM6	NM_020928	0.00029648	0.744331	1.27052	-1.4401
ZCCHC24	NM_153367	0.00029667	-0.192353	0.345341	-1.4517
ACTR3B	NM_001040135	0.00029717	-0.0999468	0.241439	-1.267
TBL1X	NM_001139466	0.00029767	0.6933	1.60716	-1.8841
PRSS16	NM_005865	0.0002977	-0.244211	0.0777752	-1.2501
ALDH1L2	NM_001034173	0.00029929	-0.540397	0.011097	-1.4656
THUMPD3	NM_001114092	0.00030003	0.323717	0.61363	-1.2226
CD302	NM_001198763	0.00030131	-0.0130955	0.343226	-1.2802
KCNQ1OT1	NR_002728	0.00030139	-0.0301268	0.385583	-1.334
CCDC112	NM_001040440	0.00030184	0.155755	0.296795	-1.1027
LOC728903	NR_015363	0.00030217	0.411791	0.828715	-1.3351
FAM118A	NM_001104595	0.00030252	0.153815	0.604024	-1.3662
RRAGC	NM_022157	0.00030437	0.486017	0.977307	-1.4057
CSH1	NM_001317	0.0003156	-0.291411	4.83921	-35.033
CECR2	NM_031413	0.00031635	-0.308079	0.0332527	-1.2669
RNF112	NM_007148	0.00031673	-0.119062	1.02689	-2.2129
TULP4	NM_001007466	0.00031824	0.805781	1.30452	-1.413
LOC100132247	NM_001135865	0.00031994	0.740385	1.39046	-1.5692
COBL	NM_015198	0.00032033	0.239849	0.95174	-1.638
TGFB2	NM_001135599	0.00032193	-0.528653	-0.0895986	-1.3557
GDA	NM_004293	0.0003227	-0.529255	0.207892	-1.6669
DVL2	NM_004422	0.00032309	0.342204	0.823736	-1.3962
ZNF439	NM_152262	0.0003231	0.0321999	0.431042	-1.3184
SEC16B	NM_033127	0.00032371	-0.323295	0.147966	-1.3863
SCNN1A	NM_001038	0.00033549	-0.206127	0.0521565	-1.1961
FXYD3	NM_001136007	0.00033578	-0.681032	-0.138689	-1.4563
CRELD2	NM_001135101	0.00033644	1.19472	1.78438	-1.5049
TNFSF4	NM_003326	0.00033747	-0.251929	0.0465472	-1.2298
MDM1	NM_017440	0.00033879	-0.176009	0.321547	-1.4118
TMEM216	NM_001173990	0.00033972	0.568892	0.915043	-1.2712
GJA1	NM_000165	0.00034032	-0.0163366	1.24592	-2.3987
SLPI	NM_003064	0.00034086	0.353006	2.81906	-5.5253
CHCHD4	NM_001098502	0.00034172	0.456407	0.86803	-1.3302
IGHG1		0.00035531	-0.926599	0.230252	-2.2297
LONRF3	NM_001031855	0.00035544	-0.201412	0.492723	-1.6179
WWC3	NM_015691	0.00035645	0.232262	0.610734	-1.3
REXO4	NM_020385	0.00035714	-0.018402	0.179134	-1.1467
NUPR1	NM_001042483	0.00035792	-0.175934	0.782116	-1.9427
DOCK6	NM_020812	0.00035795	-0.148959	0.0830427	-1.1745
CELF6	NM_001172684	0.00035807	0.894007	1.23491	-1.2666
STON1	NM_001198595	0.00035951	-0.306667	0.0318948	-1.2645
FASN	NM_004104	0.00036001	-0.0967944	1.16496	-2.3979
SLC25A33	NM_032315	0.00036128	0.696751	1.02451	-1.2551
PLEKHA4	NM_020904	0.0003619	-0.098667	0.814566	-1.8833
GPRIN3	NM_198281	0.00036234	-0.822872	-0.423878	-1.3186
TMEM136	NM_001198670	0.00037893	0.24474	0.681021	-1.3531
IGLC7		0.0003794	-0.837571	-0.0314624	-1.7485
PPP1R35	NM_145030	0.00037977	1.16503	1.62076	-1.3715
PPAPDC1B	NM_001102559	0.00038317	0.596602	1.11716	-1.4345
UBXN11	NM_001077262	0.00038332	0.136561	0.434462	-1.2294
TMEM95	NM_198154	0.00038383	-0.118128	0.581336	-1.6239
NELF	NM_001130969	0.00038436	0.359591	0.875664	-1.4301
NNMT	NM_006169	0.00039761	-0.456747	1.05511	-2.8518
EIF2AK3	NM_004836	0.00039815	0.402365	1.12029	-1.6448
LMAN2L	NM_001142292	0.00039878	0.593687	1.08041	-1.4013
PAPSS2	NM_001015880	0.00040175	-0.314466	0.0448824	-1.2828
FAM65A	NM_001193522	0.00040187	0.410959	0.920729	-1.4238
SLC1A2	NM_001195728	0.00040198	-0.220211	0.15995	-1.3015
SDCCAG8	NM_006642	0.00040348	0.199366	0.595729	-1.3162
BAIAP2L1	NM_018842	0.00040386	-0.159021	0.347271	-1.4204
GPHA2	NM_130769	0.000404	-0.529028	0.278525	-1.7502
KLHL21	NM_014851	0.00040445	0.17865	0.804578	-1.5432
ATL3	NM_015459	0.00040453	0.212218	0.887354	-1.5967
EP400NL	NR_003290	0.00040473	-0.936155	-0.429479	-1.4208
FICD	NM_007076	0.00041731	0.394556	0.858894	-1.3797
CERCAM	NM_016174	0.00041855	0.194663	0.655512	-1.3764
SKI	NM_003036	0.00041957	0.263303	0.792114	-1.4427
C12orf65	NM_001143905	0.00041993	0.382173	0.653513	-1.2069
LOC100505806	NR_045196	0.00042065	-0.527671	1.0856	-3.0594
FAM96A	NM_001014812	0.00042382	1.04913	1.475	-1.3434
PYCR2	NM_013328	0.00042395	0.623751	1.0367	-1.3314
LAYN	NM_178834	0.0004247	-0.45698	0.138264	-1.5107
C1RL	NM_016546	0.00043603	-0.0942493	0.658635	-1.6852
EHMT1	NM_001145527	0.00043868	0.257986	0.685951	-1.3453
IGSF9	NM_020789	0.0004422	-0.0980794	0.536584	-1.5526
ZNF323	NM_001135215	0.00044231	-0.210344	0.248014	-1.374
MGC16121	NR_024607	0.00044372	-0.541316	0.404824	-1.9267
LOC100506802	XR_110009	0.00044389	-0.594784	-0.0959367	-1.4131
CYS1	NM_001037160	0.00044469	-0.318594	0.182234	-1.415
EPC1	NM_025209	0.00045515	0.645087	1.25374	-1.5248
GEMIN5	NM_015465	0.00045608	0.329174	0.62791	-1.2301
ZNF394	NM_032164	0.00045676	0.260247	0.718038	-1.3734
DFNB59	NM_001042702	0.00046455	0.0155924	0.29465	-1.2134
NLRC5	NM_032206	0.00046464	-0.202827	0.656109	-1.8137
CTNNB1	NM_001098209	0.00046499	0.128821	0.601314	-1.3875
SMAD9	NM_001127217	0.0004792	0.17017	0.798677	-1.546
CABYR	NM_012189	0.00047991	-0.407995	0.125435	-1.4474
MIEN1	NM_032339	0.00048107	1.03182	1.64629	-1.531
C17orf91	NR_028502	0.00048264	0.306516	1.01446	-1.6335
SPAG4	NM_003116	0.00048364	-0.334207	-0.00367555	-1.2575
TNS3	NM_022748	0.00048365	-0.0318504	0.571995	-1.5198
ZUFSP	NM_145062	0.00048492	0.295447	0.581234	-1.2191
KLHL8	NM_020803	0.00049561	0.705491	1.22653	-1.435
HCFC2	NM_013320	0.00049565	0.309573	0.791448	-1.3966
MFRP	NM_031433	0.00049628	0.062762	0.369555	-1.237
CTGF	NM_001901	0.00049661	0.283465	1.16292	-1.8397
PROSER1	NM_025138	0.00049756	0.57129	0.717492	-1.1067
LOC346887	XM_294450	0.00050048	-0.670181	-0.094208	-1.4907
C17orf95	NM_001080510	0.00051553	1.36369	1.71328	-1.2742
KIAA1191	NM_001079684	0.00051695	0.996511	1.59929	-1.5186
GNAL	NM_001142339	0.0005189	0.054524	0.854401	-1.741
MOBKL1A	NM_173468	0.00052015	0.561672	1.01388	-1.3681
BTBD1	NM_001011885	0.00052041	0.935723	1.55193	-1.5328
CTRB1	NM_001906	0.00052205	-1.29058	-0.512208	-1.7152
ZNF790	NM_206894	0.00052264	-0.187367	0.0103488	-1.1469
USP53	NM_019050	0.00052377	-0.223748	0.269711	-1.4078
ASAP2	NM_001135191	0.00052458	0.442022	1.22267	-1.7179
NEK11	NM_001146003	0.00053676	-0.1081	0.0315631	-1.1016
MCOLN3	NM_018298	0.00053836	0.0331665	0.516921	-1.3984
SLC12A7	NM_006598	0.00053867	0.511387	1.11164	-1.516
SOHLH1	NM_001012415	0.00053888	-0.90929	-0.0907463	-1.7636
METRNL	NM_001004431	0.00054106	-0.802794	0.287978	-2.1299
MPP7	NM_173496	0.00054261	-0.475629	-0.0891832	-1.3072
LOC440461	NR_027283	0.00054326	1.65056	1.82469	-1.1283
FAM53C	NM_001135647	0.00054456	0.319893	0.834062	-1.4282
TAC3	NM_013251	0.00055515	-0.552248	-0.0836198	-1.3838
FLJ43390	NR_015358	0.00055602	0.438846	1.12223	-1.6059
C1orf104	NM_001039517	0.00055605	-0.0674152	0.345188	-1.3311
CFH	NM_000186	0.00055814	0.180735	0.885416	-1.6298
RILPL2	NM_145058	0.00055986	0.417444	0.838934	-1.3393
ZCCHC3	NM_033089	0.0005618	0.349969	0.670415	-1.2487
IFITM2	NM_006435	0.00056431	0.574576	1.38	-1.7477
ZNF562	NM_001130031	0.00057701	0.365028	0.97414	-1.5253
LOC100506365	XR_108864	0.00057895	0.974363	1.37195	-1.3173
OR4D2	NM_001004707	0.00057901	-0.103952	0.525246	-1.5467
TLE1	NM_005077	0.0005796	0.0580326	0.526682	-1.3838
MAGED4	NM_001098800	0.0005799	0.597187	1.15119	-1.4682
WDR67	NM_001145088	0.00057996	-0.105779	0.243819	-1.2742
OPN3	NM_014322	0.00058131	-0.329285	0.0227331	-1.2763
LOC100507493	XR_133484	0.00058266	0.52381	0.836457	-1.242
ENTPD8	NM_001033113	0.00058362	-1.09275	-0.402197	-1.6139
RPP40	NM_006638	0.00059624	-0.113849	0.143554	-1.1953
VAMP8	NM_003761	0.0005967	0.494816	1.21177	-1.6437
SFN	NM_006142	0.00060104	-0.296304	-0.0149954	-1.2153
LDHD	NM_153486	0.00060139	0.225715	0.930773	-1.6302
C12orf44	NM_001098673	0.0006164	0.440986	0.890589	-1.3657
GRK5	NM_005308	0.00061651	0.076029	0.596409	-1.4343
GAFA3		0.00061691	-1.00624	-0.229427	-1.7133
SLU7	NM_006425	0.00061861	0.53743	0.888092	-1.2751
INTS8	NM_017864	0.00061895	0.357163	0.976991	-1.5367
COX6A1	NM_004373	0.00061954	-0.461835	0.0829915	-1.4588
ALDOC	NM_005165	0.00062068	-0.0709692	0.362697	-1.3507
ZNF746	NM_001163474	0.00062489	0.425416	0.981914	-1.4707
C20orf108	NM_080821	0.00063522	0.348408	0.705325	-1.2807
NCRNA00241	NR_024277	0.00063532	0.0152164	0.324377	-1.239
PLTP	NM_006227	0.00063683	0.141942	0.658267	-1.4303
ITPRIP	NM_033397	0.0006374	-0.0946167	0.545234	-1.5582
CDK3	NM_001258	0.00063826	-0.0199948	0.346675	-1.2894
HERC5	NM_016323	0.0006405	-0.00417827	0.697562	-1.6265
LOC646870	NR_033756	0.00064279	-0.446202	-0.140428	-1.2361
CRYBG3	XM_003118522	0.00064471	-0.0283324	0.52284	-1.4653
BAT5	NM_001177515	0.00065559	0.833865	1.46936	-1.5535
C12orf63		0.0006569	-1.44113	-0.762644	-1.6005
LSG1	NM_018385	0.00065833	0.239486	0.517301	-1.2124
C6orf72	NM_138785	0.00065975	1.00927	1.3819	-1.2947
LOC728640	NR_027508	0.00066051	0.635809	0.910271	-1.2095
CHD7	NM_017780	0.00066223	0.513287	1.37036	-1.8114
DUSP2	NM_004418	0.00067545	-0.585369	0.136358	-1.6492
ZNF57	NM_173480	0.00067906	-0.257047	-0.0690187	-1.1392
ABHD3	NM_138340	0.00067907	0.099358	0.584419	-1.3996
SLC7A5	NM_003486	0.00068399	-0.388222	0.0830955	-1.3864
HNRNPA1	NM_002136	0.00068454	0.117284	0.671741	-1.4686
GCNT7	NM_080615	0.00069563	-0.304814	-0.0662494	-1.1798
DERA	NM_015954	0.00069688	0.481602	1.11264	-1.5487
NUDT14	NM_177533	0.00069782	0.561314	0.803156	-1.1825
COL4A4	NM_000092	0.00070176	-0.00979743	0.589909	-1.5154
PCDHB10	NM_018930	0.00070258	0.270489	0.76187	-1.4058
LRCH2	NM_020871	0.00070295	0.507053	0.937078	-1.3473
EMCN	NM_001159694	0.00070452	-0.106493	0.297012	-1.3227
NAB2	NM_005967	0.00071626	-0.185696	0.086196	-1.2074
SPRY2	NM_005842	0.0007166	0.0208944	0.488777	-1.3831
PPP1R21	NM_152994	0.00071748	0.185354	0.617625	-1.3494
LOC644242	NR_036540	0.00071898	-0.859817	-0.201362	-1.5784
YPEL2	NM_001005404	0.00071995	-0.123186	0.09257	-1.1613
GNL2	NM_013285	0.00072001	0.328267	0.774247	-1.3622
MYBPC3	NM_000256	0.00072082	-0.296752	-0.158574	-1.1005
FAM153A	NM_001079529	0.0007244	-0.0351402	0.437425	-1.3876
ARPP21	NM_001025068	0.00073597	-0.840364	-0.0308775	-1.7526
CCDC53	NM_016053	0.0007363	0.758802	1.31352	-1.4689
ZBTB8OS	NM_178547	0.00073712	1.03856	1.37581	-1.2633
ATP2C1	NM_001001485	0.00073728	0.491777	1.00434	-1.4266
LOC220729	NM_004168	0.00073838	0.0723449	0.389262	-1.2457
TUBB6	NM_032525	0.0007386	0.133331	0.925878	-1.7321
B3GNT8	NM_198540	0.00074003	-0.159909	0.269044	-1.3463
POPDC3	NM_022361	0.00074165	-0.0830789	0.493737	-1.4916
ABHD6	NM_020676	0.00074198	0.427482	0.959722	-1.4462
JAKMIP1	NM_001099433	0.00074402	-0.271991	0.268931	-1.4549
ADARB2-AS1	NR_033387	0.00074442	-1.16897	-0.652742	-1.4302
MYO5C	NM_018728	0.00074499	0.434725	1.04945	-1.5313
CD14	NM_000591	0.00075645	0.135184	0.641898	-1.4208
PRKG1	NM_001098512	0.00075929	-0.353807	0.0650636	-1.3369
LRP8	NM_001018054	0.0007632	-0.146812	0.189255	-1.2623
LOC100652953	XM_003403517	0.00076373	1.20195	1.53693	-1.2614
ZBTB49	NM_145291	0.00077555	-0.238752	0.163332	-1.3214
PROS1	NM_000313	0.00077664	0.146639	0.62447	-1.3926
LRRC50	NM_178452	0.00077813	-0.2913	0.124837	-1.3343
MRPL15	NM_014175	0.00078046	0.558048	1.0303	-1.3873
OLFML3	NM_020190	0.00078207	-0.0748819	0.346387	-1.3391
CCDC68	NM_001143829	0.00078324	-0.375224	0.196714	-1.4865
SLC22A23	NM_015482	0.00079548	0.0634795	0.602296	-1.4528
DUSP5	NM_004419	0.00079817	-0.606886	0.0204946	-1.5448
MUS81	NM_025128	0.00079897	0.328006	0.661172	-1.2598
FBXO31	NM_024735	0.00079966	0.569279	1.07653	-1.4213
MPPED2	NM_001145399	0.00080142	0.00973515	0.531244	-1.4355
C15orf27	NM_152335	0.00080144	-0.160588	0.253511	-1.3325
SGMS2	NM_001136257	0.00080255	-0.685705	-0.235108	-1.3666
FBXO16	NM_018660	0.00081601	0.301229	0.579605	-1.2128
TBX19	NM_005149	0.00081799	-0.149735	1.94583	-4.2739
NCRNA00201	NR_026778	0.00082065	0.44728	0.922655	-1.3903
PCOLCE	NM_002593	0.00083758	-0.0432459	0.347851	-1.3114
CA12	NM_001218	0.0008424	-0.0585567	0.623506	-1.6044
ZDHHC23	NM_173570	0.00084305	-0.110082	0.242809	-1.2771
MRPS24	NM_032014	0.0008439	1.53877	1.98094	-1.3586
SERTAD1	NM_013376	0.00085666	-0.0765118	0.505862	-1.4973
D2HGDH	NM_152783	0.00085676	-0.0299962	0.240571	-1.2063
STK36	NM_015690	0.00085943	0.169924	0.415452	-1.1855
C11orf42	NM_173525	0.00085998	-0.239837	0.0315266	-1.2069
ANAPC4	NM_013367	0.00086165	0.616274	1.0442	-1.3453
ERCC6	NM_000124	0.00086183	-0.233644	-0.0143353	-1.1642
OSTalpha	NM_152672	0.00086195	-0.838582	-0.19075	-1.5668
ZRANB1	NM_017580	0.0008644	0.467456	0.963924	-1.4108
MERTK	NM_006343	0.00086491	-0.369197	0.11695	-1.4007
PSTPIP1	NM_003978	0.00087674	-0.199848	0.168	-1.2904
LOC100505523	XR_109461	0.00087792	-0.212695	0.330086	-1.4568
RAI2	NM_001172732	0.00087894	0.44856	0.888994	-1.357
SERTAD2	NM_014755	0.00088009	0.177388	0.613105	-1.3526
PQLC3	NM_152391	0.00088377	0.0719529	0.462316	-1.3107
WDR16	NM_001080556	0.00090044	-0.591336	-0.158598	-1.3498
NBPF22P	NR_003719	0.00090048	-1.24321	-0.470201	-1.7088
C1orf162	NM_174896	0.00092293	-0.125984	0.214864	-1.2665
TMEM188	NM_153261	0.00092485	0.646344	0.874443	-1.1713
CES4A	NM_001190201	0.00093539	0.369114	0.897693	-1.4425
CWF19L2	NM_152434	0.00093657	0.207772	0.496132	-1.2213
SIRPA	NM_001040022	0.00093732	-0.341083	-0.101705	-1.1805
CHST6	NM_021615	0.00094006	-0.213464	0.446001	-1.5795
LINC00319	NR_026960	0.00094065	-1.52298	-1.08179	-1.3577
COMMD1	NM_152516	0.0009438	1.22973	1.4675	-1.1792
PCSK4	NM_017573	0.00094383	0.00263194	0.828073	-1.7721
DUS1L	NM_022156	0.00095574	0.457923	0.998625	-1.4547
KRTAP10-10	NM_181688	0.00096132	0.0188335	0.347872	-1.2562
SPRYD7	NM_020456	0.00097775	-0.0217306	0.148608	-1.1253
CNKSR3	NM_173515	0.00098151	-0.672566	0.178922	-1.8044
MED30	NM_080651	0.0009817	0.222095	0.639437	-1.3355
LRRC57	NM_153260	0.00098318	0.0849972	0.305924	-1.1655
ZNF398	NM_020781	0.00099579	0.761419	1.10798	-1.2715
LGR4	NM_018490	0.00099584	0.076779	0.504033	-1.3447
MRPS9	NM_182640	0.00100062	0.745461	1.11309	-1.2902
PAMR1	NM_001001991	0.0010025	-0.498656	0.0225068	-1.4351
CPSF3	NM_016207	0.00100462	0.451623	0.779029	-1.2548
WASH1	NM_182905	0.00101727	1.0192	1.34723	-1.2553
ORMDL2	NM_014182	0.00101816	0.745449	1.2148	-1.3845
FAM119A	NM_001127395	0.00102106	-0.19907	0.0714814	-1.2063
ARID3A	NM_005224	0.00102157	-0.183108	0.0264735	-1.1564
INO80C	NM_001098817	0.00102367	0.389191	0.966463	-1.492
MTPAP	NM_018109	0.0010351	0.283906	0.613678	-1.2568
NMI	NM_004688	0.00103563	0.0114893	0.413656	-1.3215
PTPRE	NM_006504	0.00103706	-0.192078	0.270032	-1.3776
APOLD1	NM_001130415	0.00103754	0.2118	0.652472	-1.3572
LAMA5	NM_005560	0.00103838	-0.111108	0.126564	-1.1791
SERPINB9	NM_004155	0.00103951	-0.149167	0.207905	-1.2808
PANX1	NM_015368	0.00104069	-0.191738	0.0848117	-1.2113
MLLT6	NM_005937	0.0010412	0.510402	0.937261	-1.3443
SAE1	NM_001145713	0.00104403	0.548053	1.0009	-1.3687
ZBED6	NM_001174108	0.00105574	-0.0443293	0.280599	-1.2526
STEAP4	NM_024636	0.00105952	-0.262594	0.70311	-1.953
C14orf138	NM_001040662	0.00106042	-0.06478	0.217324	-1.216
LOC389765	NR_029410	0.0010608	0.636278	0.967704	-1.2583
HEATR2	NM_017802	0.00106164	0.59368	1.09192	-1.4125
RBM18	NM_033117	0.00107538	0.530653	0.878005	-1.2722
BUD13	NM_001159736	0.00107604	0.314813	0.646938	-1.2589
SNAP47	NM_053052	0.00107705	0.964724	1.30259	-1.2639
ATP1B3	NM_001679	0.00107709	0.95363	2.25592	-2.4662
SDHAP2	NR_003265	0.00107721	0.706192	1.2196	-1.4274
MT1X	NM_005952	0.00107897	1.08966	1.94078	-1.8039
CHCHD1	NM_203298	0.00108065	1.04338	1.29472	-1.1903
FTSJ3	NM_017647	0.00108207	0.100973	0.57165	-1.3858
SMARCAD1	NM_001128429	0.00108265	0.724709	1.04905	-1.2521
TRUB2	NM_015679	0.00109932	0.705451	0.946772	-1.1821
LHB	NM_000894	0.00110072	0.121048	3.30514	-9.0888
FMO2	NM_001460	0.00110105	-0.29514	0.16598	-1.3766
GFPT1	NM_002056	0.00110464	0.457938	1.04922	-1.5066
LAIR2	NM_002288	0.00112103	-0.903828	-0.506876	-1.3167
COL22A1	NM_152888	0.00112229	0.280453	1.02132	-1.6712
EYA1	NM_000503	0.00112336	0.473661	1.05515	-1.4964
DCUN1D4	NM_001040402	0.00113869	0.390456	0.987212	-1.5123
NRARP	NM_001004354	0.00114028	-0.491187	-0.0466875	-1.3608
CTXN3	NM_001048252	0.0011566	-1.14213	-0.552812	-1.5045
IRX3	NM_024336	0.0011571	-0.0275518	0.559215	-1.5019
PPP1R15A	NM_014330	0.00115848	-0.183416	0.326384	-1.4239
STK17B	NM_004226	0.00116063	-0.0232828	0.384168	-1.3263
S100A10	NM_002966	0.00116149	0.250184	1.4474	-2.293
PRR14	NM_024031	0.00117529	0.385397	0.769533	-1.3051
FAM179A	NM_199280	0.00117691	-0.376523	0.167033	-1.4576
METTL14	NM_020961	0.001177	0.270141	0.531745	-1.1988
TTPAL	NM_001039199	0.00117722	0.374005	0.937345	-1.4777
TRPM4	NM_017636	0.00117953	-0.248483	0.0109631	-1.197
WDSUB1	NM_001128212	0.00118073	0.586762	1.05505	-1.3835
BCL6	NM_001130845	0.00118096	0.0569373	0.746413	-1.6127
AGPAT3	NM_001037553	0.00119533	0.189562	0.648544	-1.3746
SOCS3	NM_003955	0.00119662	-0.492203	0.30784	-1.7412
HSDL1	NM_001146051	0.00120468	0.581617	0.846608	-1.2016
C11orf75	NM_020179	0.00121572	0.889315	1.56207	-1.5941
RCN3	NM_020650	0.00121736	-0.382813	-0.183402	-1.1482
SEMA4C	NM_017789	0.0012179	0.111348	0.630156	-1.4328
LYPD1	NM_001077427	0.00121874	0.229643	0.773318	-1.4577
TJAP1	NM_001146016	0.00122185	0.378318	0.74351	-1.2881
COMMD9	NM_001101653	0.00123572	0.353516	0.689445	-1.2622
TEX2	NM_018469	0.00123782	0.429757	0.775179	-1.2705
REL	NM_002908	0.00123845	0.0430611	0.345805	-1.2335
LPHN2	NM_012302	0.00124142	0.0358648	0.51847	-1.3973
ARAP3	NM_022481	0.00124444	-0.100976	0.305462	-1.3254
CEBPD	NM_005195	0.00125646	0.00878584	1.49781	-2.807
C9orf95	NM_001127603	0.00125767	0.602251	1.2018	-1.5152
ENPP5	NM_021572	0.00126198	0.373673	0.733442	-1.2832
MAPKAPK3	NM_004635	0.00126307	0.368193	0.789196	-1.3389
ASB4	NM_016116	0.00126356	0.2815	1.14371	-1.8178
LOC100506388	NM_001242780	0.00126464	-0.585303	0.446647	-2.0448
LOC100509196	XM_003119833	0.00127548	-0.0750342	0.199471	-1.2096
SGK3	NM_001033578	0.00127574	0.820723	1.32296	-1.4164
C10orf116	NM_006829	0.00127574	0.199463	0.846893	-1.5664
HP	NM_001126102	0.00128102	-0.281943	1.39771	-3.2035
COPS4	NM_016129	0.00129775	1.02509	1.65967	-1.5525
C5orf55	NM_138464	0.00129952	0.0560866	0.310579	-1.1929
LOC100131138	NR_036513	0.00129974	-0.27412	0.0196221	-1.2258
S100B	NM_006272	0.00130046	-0.51477	0.000607328	-1.4294
TMEM55B	NM_001100814	0.00130083	0.526452	0.863647	-1.2633
SLC38A2	NM_018976	0.00130424	1.0237	1.79518	-1.707
TGIF1	NM_003244	0.00131622	-0.675255	0.24918	-1.8979
HAMP	NM_021175	0.00131696	-0.223522	0.148181	-1.2939
C1orf198	NM_001136494	0.00131841	0.455064	0.829416	-1.2963
C7orf58	NM_001105533	0.00132255	-0.211271	0.34306	-1.4685
EPGN	NM_001013442	0.00132267	-1.669	-1.65763	-1.0079
CERS6	NM_203463	0.00133673	0.472143	1.38379	-1.8812
MRC1	NM_001009567	0.00134234	-0.152758	0.370362	-1.4371
PCDHB16	NM_020957	0.00134416	0.187755	0.634113	-1.3626
RASGEF1A	NM_145313	0.00135568	0.166048	0.663249	-1.4115
CSNK1G3	NM_001031812	0.00135937	0.244451	0.584832	-1.2661
ATF7IP	NM_018179	0.00136222	0.44638	1.07626	-1.5474
TXNDC15	NM_024715	0.00138136	0.914628	1.6129	-1.6226
TXNDC12	NM_015913	0.00138172	0.782708	1.38463	-1.5177
PARP16	NM_017851	0.0013819	0.0513085	0.250326	-1.1479
FAM107A	NM_001076778	0.00138202	0.721059	1.52298	-1.7434
CDC42SE1	NM_001038707	0.0013828	0.313054	0.698578	-1.3063
CCDC30	NM_001080850	0.00138439	-0.588015	-0.361969	-1.1696
LOC729810	XR_040839	0.00140091	-0.235243	-0.0846101	-1.1101
PHYHIP	NM_001099335	0.00140237	-0.435141	0.0666263	-1.4159
PREB	NM_013388	0.00140463	0.370863	0.812203	-1.3579
ZFP91	NM_001197051	0.00141644	0.954807	1.37622	-1.3392
FBXO8	NM_012180	0.00141718	0.581147	0.889532	-1.2383
ZC3H7A	NM_014153	0.00141795	0.321777	0.790554	-1.3839
ARMC9	NM_025139	0.00142455	0.13958	0.524831	-1.3061
F11R	NM_016946	0.00143531	-0.0118144	0.254639	-1.2028
CD99P1	NR_033380	0.00143788	-0.647442	-0.242704	-1.3238
SPATA6	NM_019073	0.00146365	0.373216	0.784132	-1.3295
SPIRE2	NM_032451	0.0014792	0.0335027	0.322931	-1.2222
SLC1A1	NM_004170	0.00148028	0.00102714	0.709723	-1.6343
C9orf85	NM_182505	0.00148132	0.470612	0.796375	-1.2533
C7orf31	NM_138811	0.00148175	-0.346163	-0.151705	-1.1443
CDKN2AIP	NM_017632	0.00148324	0.361627	0.722608	-1.2843
PDSS2	NM_020381	0.00148401	0.482362	0.873427	-1.3114
LCA5	NM_001122769	0.00149925	0.0311469	0.207961	-1.1304
HAUS3	NM_024511	0.00150048	0.0219844	0.341521	-1.2479
DNASE1L3	NM_004944	0.00151563	-0.0605978	0.527839	-1.5036
ZNF329	NM_024620	0.00151838	0.180935	0.54652	-1.2884
UTRN	NM_007124	0.00153668	-0.00400488	0.781201	-1.7233
NGEF	NM_019850	0.00154131	-0.17754	0.682241	-1.8148
IGFBP2	NM_000597	0.00154292	-0.191216	0.525773	-1.6437
LIPC	NM_000236	0.00154299	-0.371939	0.0462349	-1.3362
LOC100507237	XR_109565	0.00155883	0.773972	1.10132	-1.2547
GAL	NM_015973	0.00156107	-0.35542	4.92959	-38.989
LOC153684	NR_015447	0.00156237	-0.677592	-0.207486	-1.3852
OMA1	NM_145243	0.00156281	0.487085	0.872681	-1.3064
CCDC55	NM_032141	0.00158214	0.749406	1.12583	-1.2981
PTX3	NM_002852	0.00158236	-0.377169	0.205962	-1.4981
GJD3	NM_152219	0.0015836	-0.20147	0.110991	-1.2418
RINT1	NM_021930	0.0015953	0.327301	0.724495	-1.3169
HOXB4	NM_024015	0.00159709	-0.293989	-0.0935742	-1.149
SOX2-OT	NR_004053	0.00159835	-0.88794	-0.132723	-1.6879
S100A1	NM_006271	0.00160122	-0.425939	0.0380592	-1.3794
TIGD7	NM_033208	0.0016048	-0.0130641	0.175927	-1.14
TMEM63C	NM_020431	0.00161516	0.399936	0.77496	-1.2969
PHF5A	NM_032758	0.00161702	0.434091	0.785199	-1.2755
HENMT1	NM_144584	0.00163609	0.160757	0.963089	-1.7439
LRRC59	NM_018509	0.00163845	0.403409	0.799572	-1.316
TRMT2B	NM_001167970	0.00164122	-0.0881708	0.122925	-1.1576
ACAD11	NM_032169	0.00165703	0.748998	1.11296	-1.287
ATCAY	NM_033064	0.00166009	0.750243	1.26676	-1.4305
ZNF721	NM_133474	0.00167653	0.195242	0.64048	-1.3615
CBR4	NM_032783	0.00167851	0.143856	0.449234	-1.2357
STYK1	NM_018423	0.0016817	-0.518199	-0.10608	-1.3306
NUBPL	NM_025152	0.00168225	0.0316802	0.313117	-1.2154
NEAT1	NR_028272	0.00168407	0.365604	1.10892	-1.674
FAM53A	NM_001013622	0.00169953	-1.05199	-0.465904	-1.5012
RAI1	NM_030665	0.00169975	0.723536	1.3994	-1.5976
GHDC	NM_001142622	0.00170094	0.0577122	0.280286	-1.1668
ARPC5L	NM_030978	0.00170251	0.711881	1.14403	-1.3492
LOC100294362	NR_029376	0.00171827	-0.532387	-0.244017	-1.2213
CAPN1	NM_001198868	0.00172035	0.23232	0.696231	-1.3793
MAML3	NM_018717	0.00172087	-0.218063	0.528929	-1.6783
LIMS3-LOC440895	NR_027145	0.00172428	-0.548911	0.377444	-1.9005
SERPINA3	NM_001085	0.00172432	-0.0875757	1.8104	-3.7269
ZNF232	NM_014519	0.00172472	0.207503	0.557881	-1.2749
TRIM5	NM_033034	0.00173717	-0.342283	-0.133161	-1.156
GLRX	NM_001118890	0.00173812	0.485717	1.02508	-1.4533
NECAB2	NM_019065	0.00174171	-0.0741103	0.126326	-1.149
HSPB1	NM_001540	0.00174273	0.835517	1.58882	-1.6856
SLC2A10	NM_030777	0.0017439	-0.620623	0.00934321	-1.5475
F3	NM_001178096	0.00175561	0.134571	1.76921	-3.1051
RPLP0P2	NR_002775	0.0017614	2.12715	2.41591	-1.2216
CYP1B1	NM_000104	0.00176294	-0.21649	0.531308	-1.6792
RGNEF	NM_001080479	0.00176313	-0.765883	-0.0489852	-1.6436
ABI3BP	NM_015429	0.00177545	-0.508287	0.138369	-1.5655
ZHX1	NM_001017926	0.00177788	0.699073	1.14094	-1.3584
DNAJC21	NM_001012339	0.00177909	0.33714	0.828099	-1.4054
HCLS1	NM_005335	0.00178447	0.176534	0.707546	-1.4449
ELOVL1	NM_022821	0.0017978	0.0497538	0.259625	-1.1566
SMAD3	NM_001145102	0.00180224	0.0835948	0.411148	-1.2549
ANKRD13D	NM_207354	0.00181781	0.287326	0.625152	-1.2639
CREG1	NM_003851	0.00183671	0.894578	1.70929	-1.7589
IPPK	NM_022755	0.00184192	0.124222	0.379082	-1.1932
CEACAM19	NM_020219	0.00185625	0.026182	0.873012	-1.7985
SAT1	NM_002970	0.00187669	0.707563	1.97953	-2.4149
TMUB2	NM_001076674	0.00188481	0.181471	0.466947	-1.2188
GOLGA5	NM_005113	0.00190453	0.565192	1.17524	-1.5263
NEFM	NM_001105541	0.00191808	-0.209476	0.175222	-1.3056
FXYD6	NM_001164831	0.00191855	0.873492	1.48794	-1.531
SLC2A14	NM_006931	0.00191906	0.227568	0.689461	-1.3773
FAHD1	NM_001018104	0.00192175	0.522083	1.00421	-1.3968
PALLD	NM_001166108	0.00192363	0.20493	0.857091	-1.5715
CHCHD5	NM_032309	0.00192369	0.549804	0.829251	-1.2137
UBE2O	NM_022066	0.00193568	0.0604208	0.294856	-1.1764
TGFBR2	NM_001024847	0.00193959	0.335965	0.932612	-1.5122
FCN3	NM_003665	0.00195565	-0.282264	-0.0183957	-1.2007
WFIKKN1	NM_053284	0.00197948	-0.0941476	0.528501	-1.5397
CEP70	NM_024491	0.00198408	0.0791623	0.386247	-1.2372
HFM1	NM_001017975	0.00199528	-0.355156	0.00197129	-1.2809
ZCCHC8	NM_017612	0.0020011	0.650285	1.17348	-1.4371
FLJ46875	XM_498914	0.0020151	-0.353303	-0.133986	-1.1642
IRF7	NM_001572	0.0020151	-0.717665	-0.332114	-1.3064
ARPC1B	NM_005720	0.002016	0.572149	1.0132	-1.3576
AQP4	NM_001650	0.0020174	-0.482234	0.0856241	-1.4823
PAK1IP1	NM_017906	0.0020193	0.355174	0.890912	-1.4497
NET1	NM_001047160	0.0020355	0.145781	0.578532	-1.3498
GYPC	NM_002101	0.0020392	-0.0968912	0.194151	-1.2235
PAPLN	NM_173462	0.0020424	-0.717714	-0.224887	-1.4072
CDK2AP2	NM_005851	0.0020559	0.111993	0.591369	-1.3941
C18orf21	NM_031446	0.0020756	0.560162	0.816371	-1.1943
ALPK3	NM_020778	0.0020813	0.0132384	0.499733	-1.401
FBLL1	NR_024356	0.0020816	0.702487	1.04225	-1.2655
LOC100288778	NM_182905	0.0020954	0.990567	1.31575	-1.2528
FOXC1	NM_001453	0.0020955	-0.135772	0.183274	-1.2475
WIPI1	NM_017983	0.0020977	0.0743284	0.626523	-1.4663
TMEM161A	NM_017814	0.0020989	0.0258436	0.190259	-1.1207
FZD9	NM_003508	0.0021178	-0.262785	0.122847	-1.3064
FBXW4P1	NR_033408	0.0021182	-0.230128	-0.0409817	-1.1401
LOC100287331		0.0021214	-0.273388	-0.0330199	-1.1813
MICU1	NM_006077	0.0021222	0.390017	0.745533	-1.2794
CMBL	NM_138809	0.0021354	0.830606	1.77674	-1.9267
DLEU1	NR_002605	0.0021371	0.39859	0.957071	-1.4727
C20orf141	NM_080739	0.0021393	0.105482	1.32456	-2.328
SOX13	NM_005686	0.0021449	-0.369238	-0.193875	-1.1292
NUDT15	NM_018283	0.0021561	0.172697	0.65439	-1.3964
S1PR1	NM_001400	0.002159	-0.212902	-0.00892243	-1.1519
CSH2	NM_020991	0.0021592	-0.0315227	3.78931	-14.131
KIF5C	NM_004522	0.0021775	0.804621	1.5121	-1.6329
MED29	NM_017592	0.0021806	0.712183	1.05191	-1.2655
CA4	NM_000717	0.002184	-0.427552	0.00998056	-1.3543
TMEM2	NM_001135820	0.0021843	-0.0486181	0.423249	-1.3869
CCDC14	NM_022757	0.0021848	0.630827	1.04456	-1.3321
LOC541472	XR_108749	0.0021954	0.254847	0.818769	-1.4783
LOC100507644	XR_109127	0.0021988	0.408498	0.803266	-1.3147
KAZ	NM_001017999	0.0022015	-0.33545	0.0605114	-1.3158
TRAPPC10	NM_003274	0.0022022	0.0676941	0.412857	-1.2703
MRI1	NM_001031727	0.0022152	0.422424	0.886901	-1.3798
DUSP16	NM_030640	0.0022155	0.181624	0.737424	-1.47
ARHGEF5	NM_005435	0.0022161	0.0242801	0.370595	-1.2713
LTF	NM_002343	0.0022181	-0.313346	0.367277	-1.6028
C21orf91	NM_001100420	0.0022209	0.060826	0.548478	-1.4022
C7orf47	NM_145030	0.0022242	0.587042	0.819721	-1.175
IKZF2	NM_001079526	0.0022356	0.227064	0.607287	-1.3015
TSHB	NM_000549	0.0022367	-0.586355	4.285	-29.27
PNKP	NM_007254	0.0022564	0.282585	0.572935	-1.2229
KIAA1377	NM_020802	0.0022605	0.445992	0.800824	-1.2788
RAB27A	NM_004580	0.0022625	0.545808	1.30299	-1.6902
LOC100130776	NR_027032	0.0022644	-0.465505	-0.144274	-1.2494
NCRNA00103	NR_033380	0.0022822	-0.598618	-0.0232218	-1.4901
RTP4	NM_022147	0.0022847	-0.1277	0.224246	-1.2763
IL10RB	NM_000628	0.0023025	0.147253	0.44937	-1.233
HEPH	NM_001130860	0.0023025	-0.428343	0.00279454	-1.3483
LOC100287689		0.0023039	-0.120411	0.221804	-1.2677
CRYAB	NM_001885	0.0023158	-0.086129	2.27616	-5.1419
THBS1	NM_003246	0.002317	-0.511562	0.332697	-1.7953
POLR1E	NM_022490	0.0023178	0.0140907	0.204496	-1.1411
LOC100132707	NR_024476	0.0023372	-0.255834	-0.0123161	-1.1839
ECHDC2	NM_018281	0.0023411	0.789289	1.41206	-1.5398
C8orf4	NM_020130	0.0023436	-0.217169	0.292731	-1.424
MPZL2	NM_005797	0.002344	-0.41287	0.163063	-1.4906
SLC6A14	NM_007231	0.0023558	-0.592007	0.0379774	-1.5475
EDEM3	NM_025191	0.0023585	0.740367	1.28772	-1.4614
LOC286382		0.0023632	-0.279893	0.315975	-1.5114
C15orf63	NM_001018108	0.0023644	0.624585	1.1401	-1.4295
NEUROG1	NM_006161	0.0023752	-0.11215	0.458906	-1.4856
COMMD8	NM_017845	0.0023979	0.596782	1.13103	-1.4482
PCSK5	NM_001190482	0.0023992	-0.106084	0.249419	-1.2794
ANXA4	NM_001153	0.0023998	0.272581	0.604595	-1.2588
C12orf29	NM_001009894	0.0024008	-0.128215	0.206133	-1.2608
NUMBL	NM_004756	0.0024239	0.353085	0.995015	-1.5604
PAH	NM_000277	0.0024244	-0.410066	-0.00365418	-1.3254
FYCO1	NM_024513	0.0024378	0.0798656	0.44984	-1.2923
C1orf77	NM_015607	0.0024389	-0.231593	0.035118	-1.2031
SLMO2	NM_016045	0.002442	0.46677	1.10402	-1.5554
TFB1M	NM_016020	0.0024429	0.0722437	0.417342	-1.2702
FCN2	NM_004108	0.002443	-0.824228	-0.334477	-1.4042
MAMLD1	NM_001177465	0.0024606	-0.178639	0.254091	-1.3498
ZNF512B	NM_020713	0.0024626	0.582994	1.08612	-1.4173
ZFP36	NM_003407	0.0024795	0.488168	1.56347	-2.1072
GNA13	NM_006572	0.0024972	0.00459715	0.471194	-1.3818
ELAVL3	NM_001420	0.0025019	-0.089829	0.334492	-1.3419
PDIA5	NM_006810	0.002502	0.316355	0.832852	-1.4305
KRTAP4-12	NM_031854	0.0025159	-3333.17	-0.282659	#NAME?
PGLYRP2	NM_052890	0.0025176	-3333.43	-1.20572	#NAME?
MIXL1	NM_031944	0.0025176	-3333.28	-0.97427	#NAME?
CXCL17	NM_198477	0.0025177	-3333.27	-1.00122	#NAME?
NTPCR	NM_032324	0.0025227	0.145452	0.558303	-1.3313
SLCO2A1	NM_005630	0.0025364	0.0801724	0.543527	-1.3787
POLK	NM_016218	0.0025377	0.4201	0.819488	-1.3189
ZFYVE21	NM_024071	0.0025603	0.642831	1.2462	-1.5193
SLC19A2	NM_006996	0.0025625	0.372058	0.930649	-1.4728
BTBD6	NM_033271	0.0025774	0.839605	1.26528	-1.3432
LOC100509558	XR_112341	0.0025798	-0.111425	0.112206	-1.1677
EPC2	NM_015630	0.0025829	0.795997	1.00965	-1.1596
IER2	NM_004907	0.0025844	0.736246	1.57536	-1.789
ENTPD7	NM_020354	0.0025999	-0.149819	0.174728	-1.2523
JPH3	NM_020655	0.0026188	-0.0448648	0.533729	-1.4934
FAM92B	NM_198491	0.0026204	-0.260742	0.459327	-1.6473
DENND2D	NM_024901	0.0026233	-0.133754	0.28925	-1.3407
KCTD12	NM_138444	0.0026361	0.14177	0.562734	-1.3388
PYGB	NM_002862	0.0026376	0.458144	1.05347	-1.5108
TLR5	NM_003268	0.0026381	-0.351516	-0.0646467	-1.22
BHLHB9	NM_001142524	0.0026407	0.306316	0.694391	-1.3086
MYO9A	NM_006901	0.0026773	0.105434	0.318103	-1.1588
PECR	NM_018441	0.0026963	0.12851	0.454409	-1.2534
RPAP2	NM_024813	0.0026983	0.215	0.489443	-1.2095
LOC100287024		0.0026997	-0.483708	-0.314639	-1.1243
ATAD3C	NM_001039211	0.0027161	0.437206	1.18688	-1.6814
LMTK2	NM_014916	0.0027236	0.057361	0.456119	-1.3184
TMEM45B	NM_138788	0.0027372	-0.629196	-0.0710749	-1.4724
C1orf88	NM_181643	0.0027395	0.47748	0.750998	-1.2088
LOC100131607	XR_108636	0.0027397	0.403616	0.67264	-1.205
MAFK	NM_002360	0.0027416	0.140175	0.548899	-1.3275
MFSD10	NM_001120	0.0027428	-0.245111	0.0791661	-1.252
DSG2	NM_001943	0.002743	-0.36324	0.0455562	-1.3276
PEX5L	NM_016559	0.002756	0.0504381	0.428434	-1.2995
SCRG1	NM_007281	0.0027772	-0.445511	0.0330943	-1.3934
VPS37B	NM_024667	0.0027778	0.214769	0.627217	-1.3309
GPR25	NM_005298	0.0027816	-0.259893	-0.0730535	-1.1383
ARC	NM_015193	0.0028023	-0.541162	0.153211	-1.6182
CHST12	NM_018641	0.0028039	0.303225	0.666587	-1.2864
C2orf42	NM_017880	0.002817	0.233591	0.543782	-1.2399
PCDHB12	NM_018932	0.0028172	-2856.94	0.119502	#NAME?
SLC1A3	NM_001166695	0.0028186	-0.25403	0.336302	-1.5056
LOC100132999	XR_110829	0.0028424	1.7131	1.88152	-1.1238
TRMT12	NM_017956	0.0028432	0.16211	0.461082	-1.2303
THTPA	NM_001126339	0.0028554	0.396941	0.699559	-1.2334
AMZ2	NM_001033569	0.0028605	1.15293	1.70347	-1.4646
MLF1	NM_001130156	0.0028757	0.445277	0.974703	-1.4434
CTH	NM_001190463	0.0028842	-0.144579	0.145687	-1.2229
SATB1	NM_001131010	0.0029004	-0.203259	0.261212	-1.3798
ARL4A	NM_001037164	0.0029162	-0.0126882	0.357673	-1.2927
CENPBD1	NM_145039	0.0029207	0.268463	0.471645	-1.1512
PPP2R5A	NM_006243	0.0029217	0.171394	0.50217	-1.2577
PDK4	NM_002612	0.0029358	0.263689	1.19005	-1.9005
SH2B2	NM_020979	0.0029375	-0.144127	-0.0238848	-1.0869
TMEM196	NM_152774	0.0029376	-0.162314	0.261827	-1.3418
SRA1	NM_001035235	0.002938	0.490036	0.770175	-1.2143
PKNOX2	NM_022062	0.0029395	-0.0399881	0.25355	-1.2256
LOC100507110	XR_109286	0.0029399	0.148869	0.442465	-1.2257
CWC15	NM_016403	0.0029426	1.12852	1.67203	-1.4575
WWTR1	NM_001168278	0.0029585	-0.305881	0.770677	-2.109
RBP4	NM_006744	0.0029603	0.414007	4.0199	-12.175
ACACB	NM_001093	0.0029618	0.0560524	0.5494	-1.4077
TSHZ1	NM_005786	0.0029625	0.877788	1.22468	-1.2718
LOC100507027	XR_110407	0.0029751	-0.0762333	0.562024	-1.5564
ID2	NM_002166	0.0030152	-0.486847	0.81436	-2.4643
CFLAR	NM_001127183	0.0030169	0.135635	0.567578	-1.349
C19orf66	NM_018381	0.0030178	0.50721	0.983263	-1.3909
TBC1D10A	NM_031937	0.0030195	-0.00424363	0.262771	-1.2033
FAM27A	NR_024060	0.0030218	-0.622923	-0.376065	-1.1866
HOXA10	NM_018951	0.0030242	-0.353199	-0.116105	-1.1786
SPINK5	NM_006846	0.0030428	-2500.13	-0.349294	#NAME?
GABRA6	NM_000811	0.0030445	-2500.29	-0.885982	#NAME?
ACTL8	NM_030812	0.0030551	-2500.21	-0.901767	#NAME?
MRPL23	NM_021134	0.0030626	0.659062	1.17966	-1.4346
TYW3	NM_001162916	0.0030629	0.34382	0.70872	-1.2878
CEP76	NM_024899	0.0030649	0.039527	0.271346	-1.1743
SQLE	NM_003129	0.0031007	0.14057	0.504407	-1.2868
HEY1	NM_001040708	0.0031019	0.768027	1.5083	-1.6705
MRPL44	NM_022915	0.0031034	0.160663	0.437471	-1.2115
LOC100289373	NR_036531	0.0031188	-0.331948	-0.189388	-1.1039
FOXB1	NM_012182	0.0031221	-0.105631	0.555137	-1.5809
C5orf32	NM_032412	0.0031245	1.7088	1.96973	-1.1983
EHD4	NM_139265	0.0031365	-0.174584	0.188553	-1.2862
PTER	NM_001001484	0.0031409	-0.590992	-0.288053	-1.2337
SLC25A47	NM_207117	0.0031554	-0.341209	-0.232105	-1.0786
GPNMB	NM_001005340	0.0031594	0.0754129	1.10866	-2.0466
C1orf158	NM_152290	0.0031788	-0.119016	0.49036	-1.5256
SLC22A5	NM_003060	0.003185	0.200877	0.614755	-1.3323
PLEKHG1	NM_001029884	0.0031961	-0.669838	-0.321532	-1.2731
IFI16	NM_005531	0.0031992	0.0919323	0.462049	-1.2925
ZNF638	NM_001014972	0.0032002	0.198158	0.668039	-1.385
CNOT10	NM_015442	0.0032201	0.385665	0.713592	-1.2552
PNPT1	NM_033109	0.0032382	0.330498	0.78263	-1.3681
RGPD6	NM_001037866	0.0032787	0.0688555	0.278646	-1.1565
HOOK1	NM_015888	0.0032842	0.556668	1.06843	-1.4258
SLC15A4	NM_145648	0.0032849	0.498851	0.878075	-1.3006
SPG21	NM_001127889	0.0032965	1.22024	1.64106	-1.3387
HIST1H3J	NM_003535	0.0032987	-0.20006	0.120264	-1.2486
FRMD6	NM_001042481	0.0032995	-2105.5	-0.17655	#NAME?
FOXQ1	NM_033260	0.0033006	-2105.66	-0.525904	#NAME?
ISL2	NM_145805	0.0033009	-2105.42	-0.279081	#NAME?
ATE1	NM_001001976	0.0033023	-2105.12	-0.104399	#NAME?
ZFAT	NM_001029939	0.0033033	-2105.25	-0.422942	#NAME?
ZIC5	NM_033132	0.0033037	-2105.86	-1.26235	#NAME?
CELF2	NM_001025076	0.003304	-0.515122	-0.169339	-1.2708
PDIA4	NM_004911	0.0033176	0.279582	0.858911	-1.4942
CSH1	NM_001317	0.0033245	0.164124	3.61444	-10.931
C2orf7	NM_032319	0.0033445	0.178439	0.418296	-1.1809
GTPBP4	NM_012341	0.0033447	0.472805	0.861934	-1.3096
LGI1	NM_005097	0.0033576	-0.132024	0.383631	-1.4296
MED11	NM_001001683	0.003385	0.302849	0.569408	-1.2029
TARSL2	NM_152334	0.0033983	0.246415	0.811573	-1.4795
BTN3A2	NM_001197246	0.0034027	0.90717	1.45671	-1.4636
CYP20A1	NM_177538	0.0034168	0.0647439	0.263997	-1.1481
RAB9A	NM_001195328	0.0034168	0.264592	0.731614	-1.3823
MSI1	NM_002442	0.0034216	-0.250751	-0.129455	-1.0877
NOL9	NM_024654	0.0034216	0.405884	0.729345	-1.2513
NDUFA4	NM_002489	0.003424	-1903.71	1.5395	#NAME?
KIAA0020	NM_014878	0.0034248	0.124831	0.48929	-1.2874
HLA-DRB1	NM_002124	0.0034249	1.10953	1.68512	-1.4903
FRMD8	NM_031904	0.0034351	-1904.45	0.492091	#NAME?
PRPF39	NM_017922	0.0034353	-1904.24	0.717395	#NAME?
STAT4	NM_003151	0.0034358	0.471472	0.964638	-1.4075
PRR15L	NM_024320	0.0034366	-1904.69	-0.000820159	#NAME?
ZBTB10	NM_001105539	0.0034369	-1904.74	-0.106911	#NAME?
DNAJC22	NM_024902	0.0034376	-1904.68	-0.132267	#NAME?
POMGNT1	NM_017739	0.0034398	-1904.43	-0.105875	#NAME?
TMC5	NM_001105248	0.0034407	-1905.3	-1.30436	#NAME?
TFE3	NM_006521	0.0034577	0.425579	1.03165	-1.5221
RPS2P32	NR_026676	0.0034627	1.80866	1.97212	-1.12
HSPBAP1	NM_024610	0.0034643	0.319481	0.657302	-1.2638
C1QC	NM_001114101	0.0034645	0.407404	0.872446	-1.3804
JUP	NM_002230	0.0034772	0.106542	0.608109	-1.4158
ADM	NM_001124	0.0034835	-0.106027	1.38328	-2.8075
DUSP22	NM_020185	0.003498	-0.135317	0.540492	-1.5975
ESYT2	NM_020728	0.0035165	0.772985	1.09874	-1.2533
PPP1R2	NM_006241	0.0035187	0.123028	0.471501	-1.2732
TAP1	NM_000593	0.0035188	-0.0832347	0.396058	-1.3941
KLF4	NM_004235	0.0035195	-0.313005	0.176102	-1.4036
AIFM1	NM_001130846	0.0035405	-1738.61	0.574029	#NAME?
GDF15	NM_004864	0.0035431	-1739.37	-0.644001	#NAME?
CEACAM5	NM_004363	0.0035443	-1739.52	-0.967653	#NAME?
ANXA9	NM_003568	0.0035551	-1739.32	-0.816213	#NAME?
ZNF259	NM_003904	0.0035572	0.206398	0.538576	-1.2589
SLC25A28	NM_031212	0.0035606	0.450294	0.814233	-1.2869
RAB40C	NM_001172663	0.0035637	0.0209779	0.430427	-1.3282
ANKRD27	NM_032139	0.0035648	0.454874	0.880036	-1.3427
CLEC2B	NM_005127	0.0035809	-0.256099	0.063519	-1.248
KLF10	NM_001032282	0.0035832	0.340293	0.853705	-1.4274
FAM165B	NM_058182	0.0036238	0.454306	0.706915	-1.1914
CXXC1	NM_001101654	0.003656	0.518149	0.937323	-1.3372
LOC399959	NR_024430	0.0036569	1.38684	1.83485	-1.3642
CHIC2	NM_012110	0.0036594	0.240559	0.736323	-1.4101
MST1P2	NR_027504	0.0036615	0.892005	1.37483	-1.3975
TMEM222	NM_032125	0.0036771	0.482108	0.820905	-1.2647
ANKRD42	NM_182603	0.0036794	0.00532962	0.377572	-1.2944
IFNGR2	NM_005534	0.0036973	0.348856	0.849124	-1.4145
MST1P9	NR_002729	0.0037232	-0.89748	-0.482731	-1.3331
TMEM62	NM_024956	0.0037397	0.0699479	0.253077	-1.1353
ASMT	NM_004043	0.0037437	-0.263139	-0.106706	-1.1145
ERBB3	NM_001005915	0.003758	-0.574078	-0.299112	-1.21
HERPUD2	NM_022373	0.0037608	0.45098	1.02748	-1.4912
MUM1L1	NM_001171020	0.0037952	0.586145	1.15933	-1.4878
KLHL36	NM_024731	0.0038006	0.290077	0.743017	-1.3688
TRIT1	NM_017646	0.003805	0.466037	0.931384	-1.3807
EZR	NM_001111077	0.0038182	-0.27821	1.2205	-2.8259
LINC00346	NR_027701	0.0038186	-0.755486	-0.616858	-1.1009
TMEM123	NM_052932	0.0038369	0.366117	0.968426	-1.5181
PTPDC1	NM_152422	0.0038607	0.148743	0.473258	-1.2522
RPS6KA2	NM_001006932	0.0038774	0.345158	1.19989	-1.8084
MOS	NM_005372	0.003898	-0.220111	0.0051583	-1.169
FARP1	NM_001001715	0.0039015	0.282568	0.806237	-1.4376
GH1	NM_000515	0.0039186	0.604617	7.71433	-138.11
ZNF217	NM_006526	0.0039569	0.109666	0.438175	-1.2557
SPPL3	NM_139015	0.0039793	0.487907	0.817469	-1.2566
PRR5-ARHGAP8	NM_181334	0.0039806	-0.547045	-0.152402	-1.3146
C5orf56	NM_001013717	0.0039813	0.24355	0.511475	-1.2041
RSPO3	NM_032784	0.0039821	-0.753028	-0.25685	-1.4105
LOC100507218	NR_040017	0.0039826	-0.617731	0.677262	-2.4538
ARSK	NM_198150	0.0040002	-0.249344	0.266501	-1.4298
ACRC	NM_052957	0.0040164	-0.32846	0.0505016	-1.3004
COL11A1	NM_001190709	0.0040421	-0.25707	0.276692	-1.4477
FLJ23867	NR_026900	0.0040609	-0.457781	-0.0445606	-1.3317
GMCL1	NM_178439	0.0040757	0.462814	0.829812	-1.2897
LPPR4	NM_001166252	0.0040769	0.26503	0.76754	-1.4167
HTATIP2	NM_001098520	0.0040797	0.298114	0.771655	-1.3885
MAP1S	NM_018174	0.0040846	-0.034234	0.207418	-1.1823
LARP6	NM_018357	0.0041008	0.246428	0.781595	-1.4491
SNORA28	NR_002964	0.0041018	-0.257589	-0.00118952	-1.1945
FAM164C	NM_001042430	0.0041041	-0.0424663	0.204736	-1.1869
SH3D21	NM_024676	0.0041219	0.233316	1.23506	-2.0024
FLJ36031	NM_175884	0.0041238	-0.734173	-0.168786	-1.4798
TMEM206	NM_001198862	0.0041561	0.011829	0.243781	-1.1744
HECTD3	NM_024602	0.0041829	0.108512	0.394321	-1.2191
BROX	NM_144695	0.0041838	-0.247285	-0.0458169	-1.1499
CWC27	NM_005869	0.0041998	0.335661	0.646974	-1.2408
TMEM57	NM_018202	0.0041999	0.340849	0.865942	-1.439
NOP14	NM_003703	0.004205	-0.0800467	0.324362	-1.3235
FAM49A	NM_030797	0.0042207	-0.358957	-0.0739966	-1.2184
TMEM184C	NM_018241	0.0042239	0.2416	0.655583	-1.3324
RBM12B	NM_203390	0.0042364	0.203192	0.511641	-1.2384
WDR60	NM_018051	0.0042411	0.178593	0.458952	-1.2145
SLC30A3	NM_003459	0.0042441	-0.378332	-0.110396	-1.2041
SELENBP1	NM_003944	0.0042825	-0.38143	0.107282	-1.4032
TNAP		0.0042978	-1.06643	-0.100293	-1.9536
ARHGAP5	NM_001030055	0.0043043	0.230162	0.595808	-1.2885
VIM	NM_003380	0.0043386	0.928409	1.84573	-1.8886
DNAJB1	NM_006145	0.0043426	0.690029	1.30283	-1.5292
RETSAT	NM_017750	0.0043428	0.0867922	0.317963	-1.1738
ZBTB9	NM_152735	0.0043637	-0.0141081	0.151008	-1.1213
KAT8	NM_032188	0.0043641	0.397442	0.611241	-1.1597
NLGN4X	NM_020742	0.0043778	-0.712923	-0.164235	-1.4628
PGM3	NM_015599	0.0043805	0.332234	0.823869	-1.406
CASP7	NM_001227	0.0043821	-0.105533	0.222148	-1.255
TMEM47	NM_031442	0.0043833	0.0688302	0.707377	-1.5568
PRLR	NM_000949	0.0043997	-0.517014	-0.215363	-1.2326
TTTY14	NR_001543	0.0044009	0.321468	0.929275	-1.5239
PSMG3	NM_001134340	0.0044162	0.411918	0.679388	-1.2037
COMMD7	NM_001099339	0.0044363	0.551371	0.908246	-1.2806
PPAPDC2	NM_203453	0.0044556	0.200407	0.409982	-1.1563
IRAK1	NM_001025242	0.0044572	0.38286	0.750605	-1.2903
NRAP	NM_198060	0.0044624	-0.822449	0.184203	-2.0092
TSPYL5	NM_033512	0.0044802	0.596346	1.24879	-1.5718
APPL2	NM_018171	0.0044821	0.195167	0.450232	-1.1934
NFKBIZ	NM_001005474	0.0045194	-0.278641	0.696328	-1.9656
FAM136A	NM_032822	0.0045416	0.451486	0.978794	-1.4412
NPAS2	NM_002518	0.0045592	-0.392852	0.073639	-1.3817
RAB13	NM_002870	0.0046178	0.444571	1.00197	-1.4716
HSD17B11	NM_016245	0.0046183	0.712722	1.27772	-1.4794
CLPTM1L	NM_030782	0.0046386	0.730902	0.986993	-1.1942
PDIA2	NM_006849	0.0046393	-0.219688	0.135168	-1.2789
ACVR1	NM_001105	0.0046402	0.312198	0.74256	-1.3476
APOA1	NM_000039	0.0046567	-0.619453	-0.263983	-1.2794
TMEM167A	NM_174909	0.0046613	0.873401	1.34019	-1.382
DTX3L	NM_138287	0.004662	0.36845	0.747109	-1.3001
TIMP4	NM_003256	0.0046751	-0.118974	0.571331	-1.6136
TSPAN19	NM_001100917	0.0046835	-0.941677	0.0658769	-2.0105
COL8A1	NM_001850	0.0047042	-0.0524676	0.501862	-1.4685
SLC35A4	NM_080670	0.0047563	0.289921	0.506787	-1.1622
PEMT	NM_007169	0.0047596	0.455949	0.901611	-1.3619
SNHG7	NR_003672	0.0047598	0.430012	0.839843	-1.3285
RAB17	NM_022449	0.00478	-0.788666	-0.470656	-1.2466
NBEA	NM_015678	0.0047804	0.875447	1.35153	-1.391
GPR89B	NM_016334	0.004784	0.254195	0.384754	-1.0947
MRPL22	NM_001014990	0.0047979	0.566669	1.0178	-1.3671
ALG2	NM_033087	0.0047993	0.912282	1.51944	-1.5233
KCNG1	NM_002237	0.0048353	-0.365372	-0.101601	-1.2006
ADCY4	NM_139247	0.0048599	-0.00176456	0.789762	-1.7309
LOC100507463	XR_108622	0.0048848	-0.289286	0.196462	-1.4003
CALU	NM_001130674	0.004898	0.0903459	0.491399	-1.3205
C14orf128	NR_027263	0.0049049	0.321594	0.58437	-1.1998
SLTM	NM_001013843	0.0049561	0.765335	1.3958	-1.5481
TMX3	NM_019022	0.004982	0.353632	1.04244	-1.6119
ZNF354A	NM_005649	0.0049972	-0.0991716	0.0871104	-1.1378
PRPF38B	NM_018061	0.0050036	0.381447	0.724962	-1.2688
POU1F1	NM_000306	0.005016	-0.112141	0.807636	-1.8918
EIF4ENIF1	NM_001164501	0.0050219	0.440902	0.797802	-1.2807
LDB2	NM_001130834	0.0050367	-0.137792	0.196602	-1.2608
INSIG2	NM_016133	0.0050374	0.224891	0.63247	-1.3265
MRPL42	NM_014050	0.0050577	0.580507	0.988244	-1.3266
CRIM1	NM_016441	0.0050577	-0.0486285	0.631256	-1.602
WASH3P	NR_003659	0.005064	1.0849	1.36023	-1.2103
NOL8	NM_017948	0.0050822	0.491857	0.965374	-1.3885
SIX5	NM_175875	0.0050969	-0.295783	-0.105486	-1.141
SHQ1	NM_018130	0.0050993	-0.0534579	0.324529	-1.2995
ERV3-2		0.0051215	-0.931645	-0.618887	-1.2421
PDPR	NM_017990	0.0051445	0.360549	0.762732	-1.3215
TMPRSS3	NM_024022	0.0051581	-0.899149	-0.50124	-1.3176
MYO19	NM_001033580	0.0051763	-0.0220249	0.249452	-1.207
TAAR5	NM_003967	0.0052383	-0.189993	0.159329	-1.274
SERPINH1	NM_001235	0.0052397	-0.157742	0.283098	-1.3574
JRKL	NM_003772	0.0052801	0.0309881	0.389346	-1.282
ZNF836	NM_001102657	0.0052955	-0.122721	0.0586659	-1.134
PHAX	NM_032177	0.0052981	0.556125	0.842867	-1.2199
ACADM	NM_000016	0.0053214	0.388576	0.943704	-1.4693
CLCNKA	NM_004070	0.005322	-2916.35	0.0776847	#NAME?
CRK	NM_005206	0.0053224	-0.0620609	0.145231	-1.1545
SNHG1	NR_003098	0.0053226	0.810768	1.09087	-1.2143
UBLCP1	NM_145049	0.005342	0.18783	0.636843	-1.3651
ZBTB37	NM_032522	0.005365	-0.30325	-0.143451	-1.1171
CLIC2	NM_001289	0.0053771	-0.336562	-0.134236	-1.1506
LOC728613	NM_013232	0.0053783	1.04378	1.44008	-1.3161
MYEOV2	NM_001163424	0.0053808	1.46194	1.96077	-1.4131
CISH	NM_013324	0.0053818	-0.712617	-0.21482	-1.4121
LAMB1	NM_002291	0.0053837	0.151942	0.614371	-1.3779
LOC100131354	XM_001719406	0.0053849	-0.131331	0.227715	-1.2826
SWI5	NM_001040011	0.005396	1.02743	1.18574	-1.116
CDC7	NM_001134419	0.0053988	-0.105761	0.109919	-1.1613
CDADC1	NM_001193478	0.0054022	0.126383	0.503049	-1.2983
TTC39B	NM_001168339	0.0054179	-0.0832611	0.0785307	-1.1187
UBE2F	NM_080678	0.0054183	0.620722	0.884497	-1.2006
H19	NR_002196	0.0054399	-0.869424	-0.273574	-1.5114
ZBTB48	NM_005341	0.005462	-0.0688946	0.191414	-1.1977
SEMA3C	NM_006379	0.0054633	-0.529203	-0.102159	-1.3445
CDC25B	NM_004358	0.0054788	0.354498	0.71321	-1.2823
ZNF730	XM_001719792	0.0054801	0.559548	0.685371	-1.0911
SERPINE2	NM_001136528	0.005484	0.083185	0.733706	-1.5697
MINOS1	NM_001032363	0.0055048	1.85213	1.97865	-1.0917
OR52K2	NM_001005172	0.005517	-0.698964	-0.32404	-1.2968
PPP4R2	NM_174907	0.0055357	0.421209	0.821478	-1.3198
LCN2	NM_005564	0.0055594	-0.406084	0.332542	-1.6686
TMF1	NM_007114	0.0055755	0.161116	0.453833	-1.2249
MRC2	NM_006039	0.005578	-0.237753	0.217195	-1.3707
GALNS	NM_000512	0.0056016	0.129329	0.389874	-1.1979
C5orf54	NM_022090	0.0056197	0.446892	0.849815	-1.3222
HSD17B1	NM_000413	0.0056214	-0.0623117	0.206917	-1.2052
UCN2	NM_033199	0.0056245	0.594906	1.38718	-1.7318
PLK3	NM_004073	0.0056559	0.0872961	0.425461	-1.2641
C12orf34	NM_032829	0.0056564	0.433997	0.833174	-1.3188
RBFOX3	NM_001082575	0.0056625	-0.75927	-0.0768406	-1.6048
SLC6A17	NM_001010898	0.0056639	0.141999	0.565469	-1.3411
DEF8	NM_017702	0.0056832	0.400014	0.815254	-1.3335
EGR1	NM_001964	0.0057211	0.867667	1.72899	-1.8167
AKIRIN2	NM_018064	0.0057227	0.723698	1.02864	-1.2354
PHOX2A	NM_005169	0.0057237	-2499.36	1.60913	#NAME?
OGN	NM_014057	0.005738	-0.506699	0.278654	-1.7235
TAS2R16	NM_016945	0.0057563	-2500.25	-1.07904	#NAME?
SLC24A6	NM_024959	0.0057568	-0.177323	0.0788445	-1.1943
PDDC1	NM_182612	0.0057573	0.153827	0.647716	-1.4082
PLA2G2F	NM_022819	0.0057578	-2500.21	-1.19509	#NAME?
C22orf26	NM_018280	0.0057578	-2500.1	-1.05059	#NAME?
ANGEL1	NM_015305	0.005761	0.0983615	0.370754	-1.2078
LOC728323	NR_024437	0.0057626	1.38704	1.63746	-1.1895
S100A11	NM_005620	0.0057799	0.581488	1.10535	-1.4378
PAK6	NM_001128628	0.0057814	0.209455	0.517972	-1.2384
TBX3	NM_005996	0.005783	-0.632423	-0.259394	-1.2951
INTS3	NM_023015	0.0057969	0.33322	0.854353	-1.4351
FBXO2	NM_012168	0.0058359	0.807408	1.31725	-1.4239
PPRC1	NM_015062	0.005858	0.0669203	0.399294	-1.2591
LOC150381	NR_027034	0.0058621	1.01807	1.33333	-1.2442
SLC25A32	NM_030780	0.0058631	0.785781	1.31807	-1.4462
RBM27	NM_018989	0.0058996	0.607184	0.799628	-1.1427
F2R	NM_001992	0.0059033	-0.202215	-0.070744	-1.0954
MARVELD1	NM_031484	0.0059352	0.34707	0.858833	-1.4258
POR	NM_000941	0.0059578	0.494669	0.947977	-1.3692
C22orf25	NM_152906	0.0059996	0.14073	0.311495	-1.1257
BAMBI	NM_012342	0.0060046	-0.0298268	0.543765	-1.4882
MIR22HG	NR_028502	0.0060389	0.692444	0.995092	-1.2334
RAB25	NM_020387	0.0060426	0.570144	0.925268	-1.2791
DDX58	NM_014314	0.0060434	0.0521439	0.31337	-1.1985
ETNK1	NM_001039481	0.0060568	0.222607	0.749065	-1.4404
SEMG2	NM_003008	0.0060596	-2187.78	-0.66517	#NAME?
GYS2	NM_021957	0.0060603	-2187.78	-0.737294	#NAME?
TOX2	NM_001098796	0.0060964	0.390832	0.945667	-1.469
ATP8B2	NM_001005855	0.0061046	0.355665	0.948477	-1.5082
GDE1	NM_016641	0.0061171	0.449967	0.880435	-1.3477
DIP2C	NM_014974	0.0061221	0.179026	0.540086	-1.2844
C20orf106	NM_001012971	0.0061243	-0.088099	0.125548	-1.1596
RP9P	NR_003500	0.0061356	0.484233	0.755998	-1.2073
NADSYN1	NM_018161	0.0061361	0.151219	0.521675	-1.2928
LOC100506130	XR_108747	0.0061391	-0.0045358	0.270948	-1.2104
EAF1	NM_033083	0.006177	0.44219	0.895844	-1.3695
HES6	NM_001142853	0.0061821	-0.54167	0.0728648	-1.5311
ARL4D	NM_001661	0.0061832	-0.0504197	0.352162	-1.3219
THUMPD2	NM_025264	0.006217	0.218403	0.51245	-1.2261
SLC12A6	NM_001042494	0.0062236	0.181094	0.740405	-1.4736
COPG	NM_016128	0.0062412	0.8019	1.19407	-1.3124
RXRA	NM_002957	0.0062573	0.543598	1.04443	-1.415
TIMM9	NM_012460	0.006283	0.426746	0.847341	-1.3385
LOC401397	NR_015442	0.0062848	0.873866	1.22117	-1.2722
AGT	NM_000029	0.0062988	0.136522	0.662325	-1.4397
RBM26	NM_022118	0.0062995	-0.0268488	0.161171	-1.1392
NOP10	NM_018648	0.0063035	1.37655	1.7768	-1.3197
DDRGK1	NM_023935	0.0063153	0.589401	0.981491	-1.3123
FBXO15	NM_001142958	0.0063176	0.360355	0.629808	-1.2054
C11orf63	NM_024806	0.0063558	-0.140717	0.129596	-1.2061
ZNF791	NM_153358	0.0063577	1.04448	1.37351	-1.2562
MPPED1	NM_001044370	0.0063803	-0.411131	0.113055	-1.4381
DPY19L3	NM_001172774	0.006381	-1841.81	0.867051	#NAME?
TMEM126A	NM_032273	0.0063821	1.17362	1.37601	-1.1506
SOX6	NM_001145811	0.006396	-1841.79	0.511978	#NAME?
EID2B	NM_152361	0.0063977	-1841.49	0.739499	#NAME?
TMEM88	NM_203411	0.0064005	-1842.07	-0.181939	#NAME?
PIGU	NM_080476	0.0064023	-1841.71	0.114689	#NAME?
GPC4	NM_001448	0.0064184	0.236954	1.75352	-2.8611
DLL1	NM_005618	0.0064216	-0.344595	-0.130552	-1.1599
FPGT	NM_003838	0.006422	0.0789632	0.403546	-1.2523
ZFP36L1	NM_004926	0.0064224	-0.353691	0.123112	-1.3917
BCAT1	NM_001178091	0.0064798	-0.522909	0.814764	-2.5274
HLA-F-AS1	NR_026972	0.0064813	1.83492	1.98379	-1.1087
CKAP2	NM_001098525	0.0064848	0.313275	0.611275	-1.2294
SCIN	NM_001112706	0.0064956	-0.619588	-0.26527	-1.2784
LOC100506758	XR_110007	0.0065028	-0.246826	-0.129714	-1.0846
MST1	NM_020998	0.0065183	-0.0196339	0.582737	-1.5182
SMAD7	NM_001190821	0.0065249	0.0487279	0.337414	-1.2215
LUC7L2	NM_016019	0.0065639	-1666.12	0.650594	#NAME?
MTRF1	NM_004294	0.0065783	-1666.75	-0.399623	#NAME?
LRRC36	NM_001161575	0.0065784	-1666.98	-0.682517	#NAME?
GALNT11	NM_022087	0.0065786	0.904572	1.53881	-1.5521
ULK4	NM_017886	0.0065797	-1666.92	-0.710415	#NAME?
OPA3	NM_001017989	0.0065808	-1666.85	-0.692211	#NAME?
PPP1R12C	NM_017607	0.0065963	0.444	0.70381	-1.1973
DROSHA	NM_001100412	0.006599	0.858062	1.34958	-1.4059
ABHD12	NM_001042472	0.0066041	0.167448	0.575482	-1.3269
RMND5A	NM_022780	0.0066176	0.282934	0.822044	-1.4531
LHFP	NM_005780	0.0066217	0.00410421	0.437867	-1.3508
RHOB	NM_004040	0.0066849	0.212039	1.15664	-1.9247
WFS1	NM_001145853	0.0066984	-1521.13	1.08227	#NAME?
FLJ43681	NR_029406	0.0067019	1.57379	1.8145	-1.1816
PPID	NM_005038	0.0067038	-1521.41	0.439535	#NAME?
TGFBR1	NM_001130916	0.0067038	-1521.18	0.699973	#NAME?
KRT10	NM_000421	0.0067049	-1520.92	0.945257	#NAME?
TDRD3	NM_001146070	0.0067154	-1521.59	0.125849	#NAME?
TRAF3IP1	NM_001139490	0.006716	-1521.37	0.345109	#NAME?
CHST2	NM_004267	0.0067165	-1521.37	0.321471	#NAME?
FLNB	NM_001164317	0.0067175	-1521.22	0.42883	#NAME?
VGLL1	NM_016267	0.0067177	-1522.2	-0.737392	#NAME?
LIX1	NM_153234	0.0067178	-0.628267	-0.205344	-1.3406
MED13	NM_005121	0.0067179	-1521.75	-0.214861	#NAME?
AP4E1	NM_007347	0.0067191	-1522.29	-0.924594	#NAME?
MEIS1	NM_002398	0.0067192	-1521.94	-0.513486	#NAME?
CXCL13	NM_006419	0.0067193	-1521.67	-0.202888	#NAME?
PAX4	NM_006193	0.0067196	-1521.87	-0.458359	#NAME?
UPK1B	NM_006952	0.0067211	-1522.32	-1.08084	#NAME?
FKBP8	NM_012181	0.0067219	-1521.35	0.0143813	#NAME?
MAGEB2	NM_002364	0.0067229	-1522.1	-0.931177	#NAME?
LOC100128288	NR_024447	0.0067243	-0.11571	-0.0210532	-1.0678
SPINK4	NM_014471	0.0067249	-1521.86	-0.761357	#NAME?
ZNF700	NM_144566	0.0067371	0.245746	0.441432	-1.1453
VCAM1	NM_001078	0.0067568	-0.398205	-0.00216643	-1.3159
FAM114A1	NM_138389	0.0067787	0.0464937	0.443717	-1.317
CYP4F30P	NR_023391	0.0067953	0.591091	0.865874	-1.2098
GNMT	NM_018960	0.006796	-0.531885	-0.153548	-1.2998
FLJ37644	XR_109424	0.0068049	-0.661025	0.0637181	-1.6526
HMG20B	NM_006339	0.0068228	-0.00110169	0.21855	-1.1645
ATP11A	NM_015205	0.0068384	-0.00357122	0.772934	-1.713
RSPH10B	NM_173565	0.0068623	-0.997824	-0.319754	-1.6
FBXW12	NM_001159927	0.0068645	0.755166	1.3287	-1.4882
FAM129A	NM_052966	0.0068954	0.159956	0.517565	-1.2813
IKBIP	NM_153687	0.0068979	-0.162099	0.120426	-1.2163
MFAP2	NM_001135247	0.0069006	-0.4584	-0.116555	-1.2674
RALYL	NM_001100391	0.0069025	-0.0679814	0.464231	-1.4461
RAB11FIP3	NM_001142272	0.0069559	0.39228	1.01962	-1.5447
DYNLT3	NM_006520	0.006964	0.893995	1.66711	-1.709
MAD2L2	NM_001127325	0.0069806	0.315351	0.517392	-1.1503
C1orf122	NM_001142726	0.0069813	1.07676	1.4853	-1.3273
LRRC40	NM_017768	0.0069987	0.390004	0.772518	-1.3036
OSMR	NM_001168355	0.0070406	-0.34345	0.355291	-1.6231
SMG8	NM_018149	0.007045	0.0798339	0.407738	-1.2552
TCEAL7	NM_152278	0.0070574	0.82358	1.46914	-1.5643
COQ10A	NM_001099337	0.0070626	0.879767	1.0841	-1.1522
C1orf229	NM_207401	0.0070759	0.954582	1.18452	-1.1728
KIAA0427	NM_001142397	0.0070981	-0.135785	0.117163	-1.1916
ZNF331	NM_001079906	0.0070992	0.916688	1.48269	-1.4804
RUNX2	NM_001015051	0.007101	-0.496543	-0.252871	-1.184
BHLHE23	NM_080606	0.0071021	0.620747	1.42771	-1.7495
LINC00246A	NR_026595	0.0071553	0.566524	0.819011	-1.1913
CXXC5	NM_016463	0.0072019	1.37485	1.75469	-1.3012
LOC100652791	NR_045217	0.007215	0.795123	1.04945	-1.1928
PXDN	NM_012293	0.0072216	-0.708337	-0.134136	-1.4889
USP1	NM_001017415	0.0072365	0.510728	1.08036	-1.4841
SLC12A2	NM_001046	0.0072834	0.117853	0.412014	-1.2262
KCNK1	NM_002245	0.0073212	0.629839	1.23729	-1.5236
EXOC2	NM_018303	0.0073618	0.0705265	0.319878	-1.1887
CAPS2	NM_032606	0.0073759	0.364389	0.683402	-1.2475
RAPH1	NM_203365	0.0073772	0.399443	0.745249	-1.2709
GCNT2	NM_001491	0.0073805	-0.577704	0.026023	-1.5196
LPIN1	NM_145693	0.007383	0.67625	1.28573	-1.5257
AK8	NM_152572	0.0074563	-0.0798979	0.418576	-1.4127
TUFT1	NM_001126337	0.0074566	0.447869	0.853218	-1.3244
CCDC142	NM_032779	0.0074829	1.23438	1.50711	-1.2081
CLTCL1	NM_001835	0.0074957	-0.159106	0.215415	-1.2964
PHLDB3	NM_198850	0.0075031	-0.0384615	0.365803	-1.3234
HSPA1A	NM_005345	0.0075184	0.937051	1.859	-1.8947
CA5BP	NR_026551	0.0075238	-0.0702579	0.356192	-1.3439
RIIAD1	NM_001144956	0.0075428	0.487345	0.909131	-1.3396
LONRF2	NM_198461	0.0075951	0.844129	1.28773	-1.36
LSR	NM_015925	0.0076178	0.110778	0.54776	-1.3538
C10orf82	NM_144661	0.0076208	-0.432149	0.322011	-1.6866
TWSG1	NM_020648	0.0076227	0.438231	1.21049	-1.7079
MEF2C	NM_001131005	0.0076607	0.300816	0.827777	-1.4409
CPLX1	NM_006651	0.0076647	0.0541368	0.286389	-1.1747
VEZT	NM_017599	0.0076769	0.550627	0.94802	-1.3171
CRIPAK	NM_175918	0.0076813	0.180441	0.588099	-1.3265
SNX29	NM_001080530	0.007683	0.168019	0.576475	-1.3273
TRIM45	NM_001145635	0.0076844	-0.0133587	0.254863	-1.2043
DNAJC3-AS1	XR_109147	0.007699	0.81024	0.96371	-1.1122
RPS6KA6	NM_014496	0.0077016	0.133454	0.518204	-1.3056
PLVAP	NM_031310	0.0077198	0.249317	0.650259	-1.3204
TTC18	NM_145170	0.0077594	0.639193	1.13849	-1.4135
C7orf49	NM_024033	0.0077609	0.420593	0.685518	-1.2016
BEND7	NM_001100912	0.0077623	0.573742	0.857166	-1.2171
LOC100130428	XR_110533	0.0077637	-0.323351	-0.187193	-1.099
ZFP64	NM_018197	0.0077751	0.209032	0.521242	-1.2416
POGLUT1	NM_152305	0.0077813	0.307479	0.587776	-1.2144
FGF7	NM_002009	0.0078011	0.434575	0.832641	-1.3177
SNORA78		0.0078555	0.716822	1.5769	-1.8151
FOXD3	NM_012183	0.0078568	-0.175832	0.185187	-1.2843
MYC	NM_002467	0.007883	-0.20234	0.106908	-1.2391
KLHL29	NM_052920	0.0078968	-0.160296	0.789232	-1.9312
SLAMF9	NM_033438	0.0078983	-0.233382	-0.0184354	-1.1607
ZHX2	NM_014943	0.007935	0.358706	0.920636	-1.4762
TFB2M	NM_022366	0.0079368	0.36322	0.832015	-1.384
CCDC110	NM_001145411	0.0079443	-0.373521	-0.0483378	-1.2528
DTX4	NM_015177	0.0079565	-0.341376	-0.0259984	-1.2443
BZW2	NM_001159767	0.0079766	0.633853	1.11302	-1.3939
A2M	NM_000014	0.0080351	1.47766	2.0031	-1.4394
KCNJ3	NM_002239	0.0080385	0.419504	1.04916	-1.5472
INMT	NM_006774	0.0080445	-0.821884	-0.319598	-1.4165
LOC100506517	XR_110223	0.0080564	0.46716	0.96523	-1.4123
GH2	NM_002059	0.0080774	-0.613105	2.96447	-11.939
AGR2	NM_006408	0.0080807	-0.237174	1.00733	-2.3694
TIE1	NM_005424	0.0081003	-0.314667	-0.0294242	-1.2186
KRT15	NM_002275	0.0081196	-0.262079	-0.0120288	-1.1892
GTF2IRD2B		0.008121	0.0454116	0.707194	-1.582
GIMAP4	NM_018326	0.0081416	-0.0396224	0.171324	-1.1574
LOC145694	XR_109210	0.0081561	-0.0087003	0.521032	-1.4437
TMEM229A	NM_001136002	0.0081958	-1.07135	0.616567	-3.2219
POLR3A	NM_007055	0.0082029	0.157372	0.482723	-1.253
DOK5	NM_018431	0.008205	-0.675869	-0.376287	-1.2308
NOC3L	NM_022451	0.0082247	0.267198	0.550212	-1.2167
SLC7A6	NM_001076785	0.0082424	0.0436615	0.475711	-1.3491
HS3ST3B1	NM_006041	0.0082558	-0.891495	-0.603395	-1.221
STAT3	NM_003150	0.0082784	-0.592832	-0.210902	-1.3031
GLYR1	NM_015129	0.0082834	0.0993061	0.430182	-1.2578
HSPB2	NM_001541	0.0082958	-0.217506	0.168963	-1.3072
TRAPPC2	NM_001011658	0.0082983	0.48273	0.840845	-1.2817
CHSY1	NM_014918	0.0082984	0.256689	0.874882	-1.535
PCDHB4	NM_018938	0.0083244	0.0880415	0.370159	-1.216
SSR4P1	NR_027292	0.0083802	-0.0839845	0.310069	-1.3141
RNF111	NM_017610	0.0084036	0.578862	1.03553	-1.3724
PEX12	NM_000286	0.0084047	0.3107	0.743633	-1.35
MTMR9LP	NR_026850	0.00842	0.321598	0.795421	-1.3888
CCDC75	NM_174931	0.0084608	0.36537	0.604837	-1.1806
UPF1	NM_002911	0.0084614	0.306589	0.735701	-1.3464
PNMT	NM_002686	0.008497	-0.0467375	0.374681	-1.3392
SMARCAL1	NM_001127207	0.0085033	0.205317	0.52179	-1.2453
PDZRN3	NM_015009	0.0085191	-0.624073	-0.100082	-1.4379
PIH1D1	NM_017916	0.008524	0.553377	1.04515	-1.4062
GORAB	NM_001146039	0.0085364	0.205133	0.476863	-1.2073
SPHAR	NM_006542	0.0085371	0.32635	0.563509	-1.1787
LGALS3	NM_001177388	0.0085394	0.561019	1.51419	-1.9361
OR6K2	NM_001005279	0.0085813	-0.499891	0.00991075	-1.4239
RELN	NM_005045	0.0085817	-0.703261	-0.235166	-1.3833
S1PR3	NM_005226	0.0086433	0.0013619	0.860147	-1.8135
THRB	NM_000461	0.0086446	0.39434	0.997803	-1.5194
TRIM25	NM_005082	0.0087359	0.148068	0.518092	-1.2924
C3orf38	NM_173824	0.0087361	0.313773	0.596174	-1.2162
SLC17A5	NM_012434	0.0087435	0.691248	1.09871	-1.3263
SCAF11	NM_004719	0.0087551	0.467993	0.981823	-1.4278
GDAP1	NM_001040875	0.0087823	0.423801	0.972191	-1.4625
GSPT2	NM_018094	0.0087953	0.552062	0.969511	-1.3356
GET4	NM_015949	0.0088004	0.336111	0.84811	-1.426
LYSMD2	NM_001143917	0.0088049	1.44884	1.82129	-1.2946
KHDRBS3	NM_006558	0.0088245	0.212907	0.64546	-1.3496
EGR3	NM_004430	0.0088377	-0.563924	-0.192279	-1.2938
NAV2	NM_001111018	0.0088397	-0.524343	-0.211484	-1.2422
C16orf71	NM_139170	0.0088598	-0.333711	-0.179848	-1.1125
PAN2	NM_001127460	0.0088622	0.352893	0.717099	-1.2872
SLC27A2	NM_001159629	0.0089154	0.10569	0.621214	-1.4295
IFT46	NM_001168618	0.0089219	0.548459	0.82756	-1.2134
CMPK1	NM_001136140	0.0089241	0.617694	1.06034	-1.3591
DCAF12	NM_015397	0.0089357	0.46539	0.70358	-1.1795
SPAG6	NM_012443	0.0089384	0.423061	1.06931	-1.5651
ABHD16B	NM_080622	0.0089389	-0.210988	0.0394561	-1.1896
LOC100506125	XR_110339	0.008939	-0.136945	0.243408	-1.3017
KIAA1530	NM_020894	0.0089844	0.532981	1.13894	-1.522
EPB41L5	NM_001184937	0.009	-0.56201	-0.288195	-1.209
VIPR2	NM_003382	0.0090442	-0.447629	-0.0613113	-1.3071
RPL23AP32	NR_002229	0.0090607	0.450974	0.859854	-1.3277
SFRS4	NM_005626	0.0091017	0.796286	1.20086	-1.3237
CT45A5	NM_001007551	0.0091036	-1.26715	-0.963082	-1.2346
ZNF876P	NR_027481	0.0091042	-0.0519882	0.199484	-1.1904
PMM2	NM_000303	0.0091177	-0.225197	0.143904	-1.2915
CNN3	NM_001839	0.0091424	0.576937	1.44886	-1.8301
PMEL	NM_006928	0.0091564	-0.0528037	0.50961	-1.4767
MCEE	NM_032601	0.0091958	0.534998	0.839975	-1.2354
TRIP13	NM_001166260	0.0092193	-0.714967	-0.286257	-1.346
PREX2	NM_024870	0.0092198	-0.511811	-0.299087	-1.1589
MED20	NM_004275	0.0092204	0.0979657	0.398957	-1.232
BBS10	NM_024685	0.0092589	0.434854	0.774374	-1.2653
DCPS	NM_014026	0.0092793	0.100404	0.419012	-1.2471
CERK	NM_022766	0.0092794	0.771224	1.2477	-1.3913
BMS1	NM_014753	0.0093011	0.197614	0.567942	-1.2926
TMEM176B	NM_001101311	0.0093156	0.16889	0.500634	-1.2585
KLHDC2	NM_014315	0.0093631	1.10041	1.57785	-1.3923
HIPK2	NM_001113239	0.0093773	0.565661	1.19698	-1.549
MAN1C1	NM_020379	0.0093777	0.209749	0.608474	-1.3183
GPATCH1	NM_018025	0.009379	0.104254	0.318663	-1.1602
NKAP	NM_024528	0.0093836	0.268123	0.454322	-1.1378
PFKP	NM_002627	0.0093971	0.547612	1.1184	-1.4853
PGM5	NM_021965	0.0094197	-0.251147	0.0178203	-1.2049
NEIL2	NM_001135746	0.0094227	0.0513528	0.211636	-1.1175
USP31	NM_020718	0.0094392	0.604321	1.01741	-1.3315
ENOPH1	NM_021204	0.0094412	0.763416	1.43219	-1.5897
MGAT2	NM_002408	0.0094432	0.128649	0.393754	-1.2017
HERPUD1	NM_001010989	0.0094567	0.947529	1.73163	-1.722
STX12	NM_177424	0.0094761	0.968862	1.45221	-1.398
BRAF	NM_004333	0.0094973	0.0152705	0.276703	-1.1987
ZDHHC6	NM_022494	0.0095157	0.356832	0.73914	-1.3034
TNFRSF14	NM_003820	0.0095206	-0.0860635	0.25767	-1.269
TUBB2B	NM_178012	0.0095241	0.743173	1.30183	-1.4729
CERS3	NM_178842	0.0095388	-1.46804	-0.930272	-1.4517
B3GNT2	NM_006577	0.0095415	0.53269	1.12986	-1.5127
TP53I13	NM_138349	0.0095438	0.154219	0.356941	-1.1509
SNORD89	NR_003070	0.0095442	0.0739651	0.329635	-1.1939
MAGI2-IT		0.009603	-0.120526	0.116791	-1.1788
TMEM114	NM_001146336	0.0096358	-0.0796876	0.366267	-1.3622
ISOC1	NM_016048	0.009642	0.847923	1.49483	-1.5658
DHX32	NM_018180	0.0096446	0.315246	0.723384	-1.327
PDXDC2P		0.0096586	1.21776	1.35333	-1.0985
C1orf210	NM_001164829	0.0096831	-0.21496	-0.0769918	-1.1004
ZFP106	NM_022473	0.0097001	0.900631	1.25323	-1.2769
NGB	NM_021257	0.0097014	-0.682004	-0.330795	-1.2756
SLC41A2	NM_032148	0.0097191	-0.221243	-0.037229	-1.136
PET117	NM_001164811	0.0097224	0.679743	0.996752	-1.2457
GALNT4	NM_003774	0.0097599	-0.379573	0.27286	-1.5718
PNMA5	NM_052926	0.0097633	0.145368	1.28886	-2.2091
SERHL2	NM_014509	0.0098043	-0.281842	0.00751159	-1.2221
CRISPLD2	NM_031476	0.0098195	-0.138887	0.547418	-1.6092
NPM3	NM_006993	0.0098205	-0.196609	0.00242523	-1.1479
GOLIM4	NM_014498	0.0098578	0.240592	0.723753	-1.3978
FAM35B	NR_027632	0.0098586	0.196745	0.579708	-1.304
STYXL1	NM_016086	0.00986	0.172542	0.431389	-1.1965
KCNG3	NM_133329	0.0098815	-0.919763	-0.54124	-1.3
OTUD1	NM_001145373	0.0098963	0.782286	1.16048	-1.2997
SAT2	NM_133491	0.0099036	1.34132	1.80329	-1.3774
GLRX2	NM_016066	0.0099156	0.49428	0.783364	-1.2219
KCNE4	NM_080671	0.0099226	-0.249241	0.34852	-1.5134
SAA1	NM_000331	0.0099237	-0.44174	0.452906	-1.8592
TUBD1	NM_001193609	0.0099576	0.202936	0.512543	-1.2394
LCOR	NM_001170765	0.0099832	0.848755	1.16359	-1.2439
CDH1	NM_004360	0.0099964	1.03491	1.61969	-1.4998
NPR2	NM_003995	0.0099995	-0.0428145	0.23062	-1.2087
